# Supplementary material for: Copper-promoted difunctionalization of unactivated alkenes with silanes
Source: Royal Society of Chemistry journal article supplement (doi:10.1039/d1ob02318g), 2022-01-01
Supplement: d1ob02318g1.pdf [file d1ob02318g1.pdf]

## Supporting Information

### Copper-Promoted Difunctionalization of Unactivated Alkenes with Silanes

Yingying Xue,<sup>a</sup> Zhuangzhuang Guo,<sup>a</sup> Xiaoyu Chen,<sup>a</sup> Jingya Li,<sup>b</sup> Dapeng Zou,<sup>\*a</sup> Yangjie Wu<sup>\*a</sup>  
and Yusheng Wu<sup>\*a,c</sup>

<sup>a</sup>College of Chemistry, Green Catalysis Center, Zhengzhou University, Zhengzhou, Henan 450001, People's Republic of China

<sup>b</sup>Tetranov Biopharm, LLC., Zhengzhou, 450052, People's Republic of China

<sup>c</sup>Tetranov International, Inc., 100 Jersey Avenue, Suite A340, New Brunswick, NJ 08901, USA

\*Corresponding author. Tel.: (+86)-371-6776-6865; fax: (+86)-371-6776-3390; e-mail: [zdp@zzu.edu.cn](mailto:zdp@zzu.edu.cn) or [wyj@zzu.edu.cn](mailto:wyj@zzu.edu.cn)

\*Corresponding author. Tel.: (+1)-732-253-7326; fax: (+1)-732-253-7327; e-mail: [yusheng.wu@tetranovglobal.com](mailto:yusheng.wu@tetranovglobal.com)

### *Table of Contents*

|                                                                                                 |    |
|-------------------------------------------------------------------------------------------------|----|
| 1. General Information.....                                                                     | 2  |
| 2. General Procedure.....                                                                       | 2  |
| 3. Optimization of the reaction .....                                                           | 4  |
| 4. Characterization data of the products .....                                                  | 5  |
| 5. Radical trapping experiment.....                                                             | 16 |
| 6. X-Ray crystallographic data of <b>3aa</b> .....                                              | 19 |
| 7. References.....                                                                              | 21 |
| 8. <sup>1</sup> H NMR, <sup>13</sup> C NMR and <sup>19</sup> F NMR spectra of the products..... | 21 |

## 1. General Information

All manipulations were performed in 25 mL Schlenk tube equipped with a magnetic stir bar unless otherwise noted. Solvents and reagents were purchased from commercial sources and used as received. Flash column chromatography was performed using silica gel (60-Å pore size, 32-63  $\mu\text{m}$ , standard grade). Analytical thin-layer chromatography was performed using glass plates pre-coated with 0.25 mm 230-400 mesh silica gel impregnated with a fluorescent indicator (254 nm). Melting points were recorded by XT4A micro melting point Measurement Instruments, thermometer was unrevised. The transformation progress and mass spectra were indicated by GC (Shimadzu GC-2010 Plus) or GC-MS (Thermo Fisher Scientific DSQ II). NMR spectra were obtained on Bruker AVANCE III systems using  $\text{CDCl}_3$  as a solvent,  $\text{CDCl}_3$  as an internal standard substance, at 400 MHz for  $^1\text{H}$  NMR, 100 MHz for  $^{13}\text{C}$  NMR, and 376 MHz for  $^{19}\text{F}$  NMR. High-resolution mass spectrometry (HRMS) data were obtained on an Agilent Technologies 1290-6540 UHPLC/Accurate-Mass Quadrupole Time-of Flight (Q-TOF) LC/MS using ESI as ion source. X-ray analysis was performed with a single-crystal X-ray diffractometer. Preparative TLC was performed on silica gel plates and developed with ethyl acetate/petroleum ether.

## 2. General Procedure

### 2.1 Substrate Synthesis

Anilides, sulfonamides, and substrates **1** were prepared according to literature procedures.<sup>1</sup>

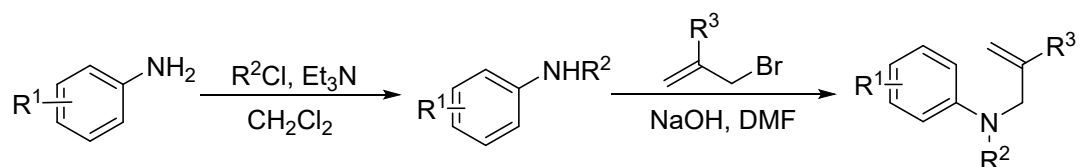

A 250 mL flask, equipped with a magnetic stirring bar, was charged with aniline compound (20.0 mmol, 1.0 equiv.),  $\text{CH}_2\text{Cl}_2$  (60.0 mL), and  $\text{Et}_3\text{N}$  (40.0 mmol, 2.0 equiv.), followed by the addition of acyl chloride (24.0 mmol, 1.2 equiv.) at 0 °C. The

reaction mixture was stirred at room temperature. After aniline compound was consumed, as indicated by TLC, the reaction mixture was quenched with aqueous NaHCO<sub>3</sub> (130 mL) and extracted with CH<sub>2</sub>Cl<sub>2</sub> (130 mL) three times. The combined organic phase was washed with brine (70 mL). After removal of solvents, the solid of the crude product was further purified by washing with a petroleum ether/ethyl acetate mixture (7:1, v/v), affording *N*-acylaniline. To a stirred solution of *N*-acylaniline (15.0 mmol, 1.0 equiv.), and NaOH (22.5 mmol, 1.5 equiv.) in DMF (45.0 mL) was added 3-bromo-prop-1-ene (19.5 mmol, 1.3 equiv.), and the mixture was stirred at room temperature. After *N*-acylaniline was consumed, as indicated by TLC, the reaction mixture was quenched with brine (90 mL) and extracted with CH<sub>2</sub>Cl<sub>2</sub> (90 mL) three times. The combined organic layers were dried with anhydrous Na<sub>2</sub>SO<sub>4</sub>, then filtered and concentrated under reduced pressure. The residue was purified by column chromatography (Petroleum/EtOAc = 8:1) on silica gel to afford **1a-1x**.

## 2.2 Experimental Procedure

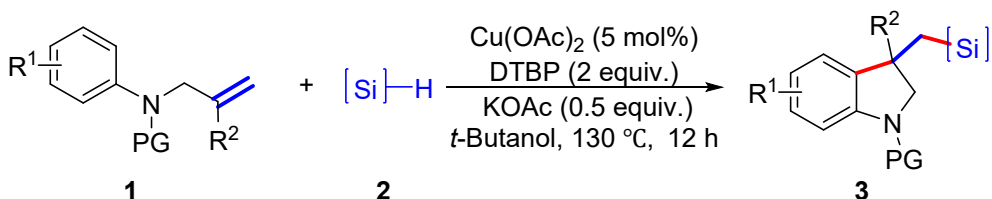

A dried 25 mL Schlenk tube equipped with a magnetic stir bar was charged with **1** (0.50 mmol, 1.0 equiv.), **2** (4.0 mmol, 8.0 equiv.), DTBP (1.0 mmol, 2.0 equiv.), KOAc (0.25 mmol, 0.5 equiv.), Cu(OAc)<sub>2</sub> (0.025 mmol, 5 mol%), and *t*-BuOH (3.0 mL). Subsequently, the tube was sealed and the resulting mixture was stirred at 130 °C for 12 h under Ar atmosphere. After cooling to room temperature, the reaction mixture was washed with water and extracted with CH<sub>2</sub>Cl<sub>2</sub> three times. The combined organic layers dried over anhydrous Na<sub>2</sub>SO<sub>4</sub>, concentrated in vacuo. The crude products were purified by flash column chromatography on silica gel (Petroleum ether/EtOAc) to afford desired products **3**.

## 2.3 Scale-up Reaction

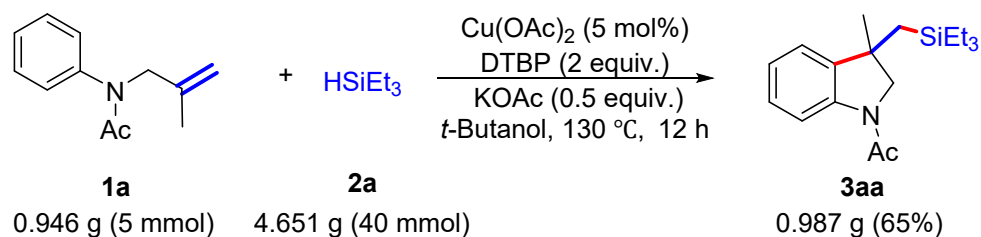

A mixture of *N*-(2-methyl-allyl)-*N*-phenylacetamide **1a** (0.946 g, 5.0 mmol, 1.0 equiv.), triethylsilane **2a** (4.651 g, 40 mmol, 8.0 equiv.), DTBP (1.462 g, 10 mmol, 2.0 equiv.), KOAc (0.245 g, 2.5 mmol, 0.5 equiv.), Cu(OAc)<sub>2</sub> (0.091g, 0.25 mmol, 5 mol%), *t*-BuOH (30 mL), was taken in a dry round-bottomed flask. The reaction mixture was then stirred at 130 °C for 12 h under an argon atmosphere. After cooling down to room temperature, the reaction mixture was washed with water and extracted with CH<sub>2</sub>Cl<sub>2</sub> three times. The combined organic layers dried over anhydrous Na<sub>2</sub>SO<sub>4</sub>, concentrated in vacuo. Then the crude reaction mixture was purified by flash silica gel column chromatography (Petroleum/EtOAc = 60:1-30:1) to afford the desired product **3aa** (0.987 g, 65%).

### 3. Optimization of the reaction

**Table S1. Reaction Optimization**

| entry | <b>2a</b><br>(equiv.) | solvent            | Catalyst (mol%)            | Oxidant<br>(equiv.) | Base<br>(equiv.) | yield<br>(%) <sup>b</sup> |
|-------|-----------------------|--------------------|----------------------------|---------------------|------------------|---------------------------|
| 1     | 10                    | <i>t</i> -Butanol  | -                          | DTBP(3)             | -                | 32                        |
| 2     | 10                    | THF                | -                          | DTBP(3)             | -                | 17                        |
| 3     | 10                    | DMSO               | -                          | DTBP(3)             | -                | 18                        |
| 4     | 10                    | Benzene            | -                          | DTBP(3)             | -                | 16                        |
| 5     | 10                    | Toluene            | -                          | DTBP(3)             | -                | 23                        |
| 6     | 10                    | CH <sub>3</sub> CN | -                          | DTBP(3)             | -                | trace                     |
| 7     | 10                    | <i>t</i> -Butanol  | CuI(10)                    | DTBP(3)             | -                | 46                        |
| 8     | 10                    | <i>t</i> -Butanol  | CuBr(10)                   | DTBP(3)             | -                | 44                        |
| 9     | 10                    | <i>t</i> -Butanol  | Cu(OAc) <sub>2</sub> (10)  | DTBP(3)             | -                | 50                        |
| 10    | 10                    | <i>t</i> -Butanol  | Cu(acac) <sub>2</sub> (10) | DTBP(3)             | -                | 0                         |

|           |          |                         |                                          |                |                                    |               |
|-----------|----------|-------------------------|------------------------------------------|----------------|------------------------------------|---------------|
| 11        | 10       | <i>t</i> -Butanol       | MnCl <sub>2</sub> ·4H <sub>2</sub> O(10) | DTBP(3)        | -                                  | 16            |
| 12        | 10       | <i>t</i> -Butanol       | AgOAc(10)                                | DTBP(3)        | -                                  | trace         |
| 13        | 10       | <i>t</i> -Butanol       | CoCl <sub>2</sub> (10)                   | DTBP(3)        | -                                  | trace         |
| 14        | 10       | <i>t</i> -Butanol       | FeCl <sub>2</sub> (10)                   | DTBP(3)        | -                                  | trace         |
| 15        | 10       | <i>t</i> -Butanol       | Ni <sub>2</sub> O <sub>3</sub> (10)      | DTBP(3)        | -                                  | 19            |
| 16        | 10       | <i>t</i> -Butanol       | Cu(OAc) <sub>2</sub> (10)                | -              | -                                  | 0             |
| 17        | 10       | <i>t</i> -Butanol       | Cu(OAc) <sub>2</sub> (10)                | TBHP(3)        | -                                  | trace         |
| 18        | 10       | <i>t</i> -Butanol       | Cu(OAc) <sub>2</sub> (10)                | TBPB(3)        | -                                  | 24            |
| 19        | 10       | <i>t</i> -Butanol       | Cu(OAc) <sub>2</sub> (10)                | LPO(3)         | -                                  | 27            |
| 20        | 10       | <i>t</i> -Butanol       | Cu(OAc) <sub>2</sub> (10)                | DTBP(3)        | NaOAc(3)                           | 57            |
| 21        | 10       | <i>t</i> -Butanol       | Cu(OAc) <sub>2</sub> (10)                | DTBP(3)        | NaHCO <sub>3</sub> (3)             | 19            |
| 22        | 10       | <i>t</i> -Butanol       | Cu(OAc) <sub>2</sub> (10)                | DTBP(3)        | KOAc(3)                            | 70            |
| 23        | 10       | <i>t</i> -Butanol       | Cu(OAc) <sub>2</sub> (10)                | DTBP(3)        | K <sub>3</sub> PO <sub>4</sub> (3) | 7             |
| 24        | 10       | <i>t</i> -Butanol       | Cu(OAc) <sub>2</sub> (10)                | DTBP(3)        | Et <sub>3</sub> N(3)               | 14            |
| 25        | 10       | <i>t</i> -Butanol       | Cu(OAc) <sub>2</sub> (10)                | DTBP(3)        | DBU(3)                             | 15            |
| 26        | 10       | <i>t</i> -Butanol       | Cu(OAc) <sub>2</sub> (10)                | DTBP(3)        | Pyridine(3)                        | 41            |
| 27        | 10       | <i>t</i> -Butanol       | Cu(OAc) <sub>2</sub> (10)                | DTBP(2.5)      | KOAc(3)                            | 74            |
| 28        | 10       | <i>t</i> -Butanol       | Cu(OAc) <sub>2</sub> (10)                | DTBP(2)        | KOAc(3)                            | 88            |
| 29        | 10       | <i>t</i> -Butanol       | Cu(OAc) <sub>2</sub> (10)                | DTBP(1.5)      | KOAc(3)                            | 35            |
| 30        | 12       | <i>t</i> -Butanol       | Cu(OAc) <sub>2</sub> (10)                | DTBP(2)        | KOAc(3)                            | 86            |
| 31        | 8        | <i>t</i> -Butanol       | Cu(OAc) <sub>2</sub> (10)                | DTBP(2)        | KOAc(3)                            | 88            |
| 32        | 6        | <i>t</i> -Butanol       | Cu(OAc) <sub>2</sub> (10)                | DTBP(2)        | KOAc(3)                            | 65            |
| 33        | 8        | <i>t</i> -Butanol       | Cu(OAc) <sub>2</sub> (15)                | DTBP(2)        | KOAc(3)                            | 72            |
| 34        | 8        | <i>t</i> -Butanol       | Cu(OAc) <sub>2</sub> (5)                 | DTBP(2)        | KOAc(3)                            | 87            |
| 35        | 8        | <i>t</i> -Butanol       | Cu(OAc) <sub>2</sub> (2)                 | DTBP(2)        | KOAc(3)                            | 75            |
| 36        | 8        | <i>t</i> -Butanol       | Cu(OAc) <sub>2</sub> (5)                 | DTBP(2)        | KOAc(1.5)                          | 87            |
| <b>37</b> | <b>8</b> | <b><i>t</i>-Butanol</b> | <b>Cu(OAc)<sub>2</sub>(5)</b>            | <b>DTBP(2)</b> | <b>KOAc(0.5)</b>                   | <b>88(80)</b> |
| 38        | 8        | <i>t</i> -Butanol       | Cu(OAc) <sub>2</sub> (5)                 | DTBP(2)        | KOAc(0.25)                         | 63            |

<sup>a</sup>Reaction conditions: **1a** (0.5 mmol, 1.0 equiv.), **2a**, oxidant, catalyst, base, solvent (3.0 mL), 130 °C, under Ar, 12 h (DTBP = di-*tert*-butylperoxide, TBHP = *tert*-butyl hydroperoxide, TBPB = *tert*-butyl peroxybenzoate, LPO = dilauroyl peroxide).

<sup>b</sup>Yields determined by GC analysis with naphthalene as the internal standard, isolated yield of **3aa** was shown in parentheses.

#### 4. Characterization data of the products

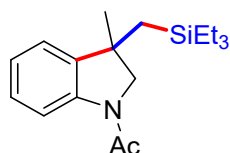

**1-(3-methyl-3-((triethylsilyl)methyl)indolin-1-yl)ethan-1-one (3aa).** White solid, 80% yield (121.6 mg). Column chromatography on silica gel (Petroleum ether/EtOAc = 10:1). M.p. = 47-49 °C.  $^1\text{H NMR}$  (400 MHz,  $\text{CDCl}_3$ , ppm) present in 5.0:1 ratio of rotational isomer about the amide:  $\delta$  8.17 (d,  $J = 8.0$  Hz, 1 H), 7.20-7.16 (m, 1 H), 7.14-7.12 (m, 1 H), 7.05-7.01 (m, 1 H), 3.93-3.83 (m, 0.33 H), 3.83-3.72 (m, 1.66 H), 2.44 (s, 0.50 H), 2.21 (s, 2.49 H), 1.33 (s, 2.54 H), 1.39 (s, 0.51 H), 1.17 (d,  $J = 14.8$  Hz, 1 H), 1.07 (d,  $J = 14.8$  Hz, 1 H), 0.88 (t,  $J = 8.0$  Hz, 9 H), 0.51-0.36 (m, 6 H);  $^{13}\text{C NMR}$  (100 MHz,  $\text{CDCl}_3$ , ppm), major rotational isomer:  $\delta$  168.6, 141.8, 141.1, 127.6, 123.8, 122.0, 116.9, 63.4, 42.5, 30.9, 26.2, 24.2, 7.4, 4.4; minor rotational isomer:  $\delta$  168.4, 144.6, 140.0, 127.2, 123.4, 123.3, 114.0, 62.0, 40.9, 30.2, 25.3, 24.5, 7.3, 4.4; **HRMS (ESI-TOF)  $m/z$ :**  $[\text{M} + \text{H}]^+$  Calcd for  $\text{C}_{18}\text{H}_{30}\text{NOSi}$  304.2091; Found 304.2093.

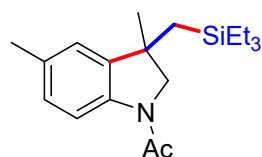

**1-(3,5-dimethyl-3-((triethylsilyl)methyl)indolin-1-yl)ethan-1-one (3ba).** Light yellow liquid, 81% yield (128.4 mg). Column chromatography on silica gel (Petroleum ether/EtOAc = 10:1).  $^1\text{H NMR}$  (400 MHz,  $\text{CDCl}_3$ , ppm) present in 5.0:1 ratio of rotational isomers about the amide:  $\delta$  8.03 (d,  $J = 8.4$  Hz, 1 H), 6.99-6.93 (m, 2 H), 3.92-3.83 (m, 0.34 H), 3.81-3.71 (m, 1.69 H), 2.41 (s, 0.50 H), 2.31 (s, 3 H), 2.19 (s, 2.50 H), 1.38 (s, 2.52 H), 1.31 (s, 0.50 H), 1.16 (d,  $J = 15.2$  Hz, 1 H), 1.05 (d,  $J = 15.2$  Hz, 1 H), 0.88 (t,  $J = 8.0$  Hz, 9 H), 0.52-0.39 (m, 6 H);  $^{13}\text{C NMR}$  (100 MHz,  $\text{CDCl}_3$ , ppm), major rotational isomer:  $\delta$  168.3, 141.9, 138.8, 133.4, 128.1, 122.6, 116.6, 63.5, 42.5, 30.8, 26.2, 24.1, 21.1, 7.4, 4.4; minor rotational isomer:  $\delta$  168.2, 144.8, 137.7, 133.1, 127.6, 124.0, 113.8, 62.1, 40.9, 30.1, 25.2, 24.4, 20.9, 7.3, 4.5; **HRMS (ESI-TOF)  $m/z$ :**  $[\text{M} + \text{H}]^+$  Calcd for  $\text{C}_{19}\text{H}_{32}\text{NOSi}$  318.2248; Found 318.2248.

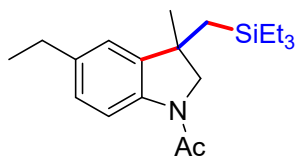

**1-(5-ethyl-3-methyl-3-((triethylsilyl)methyl)indolin-1-yl)ethan-1-one (3ca).** Light yellow liquid, 71% yield (117.4 mg). Column chromatography on silica gel (Petroleum ether/EtOAc = 10:1).  $^1\text{H NMR}$  (400 MHz,  $\text{CDCl}_3$ , ppm) present in 4.5:1 ratio of rotational isomers about the amide:  $\delta$  8.06 (d,  $J = 8.0$  Hz, 1 H), 7.02-6.95 (m, 2 H), 3.92-3.84 (m, 0.36 H), 3.82-3.71 (m, 1.63 H), 2.64-2.58 (m, 2 H), 2.42 (s, 0.54 H), 2.19 (s, 2.46 H), 1.39 (s, 2.50 H), 1.33 (s, 0.55 H), 1.21 (t,  $J = 7.6$  Hz, 3 H), 1.18-1.05 (m, 2 H), 0.88 (t,  $J = 7.8$  Hz, 9 H), 0.50-0.37 (m, 6 H);  $^{13}\text{C NMR}$  (100 MHz,  $\text{CDCl}_3$ , ppm), major rotational isomer:  $\delta$  168.3, 141.8, 139.9, 139.1, 127.0, 121.5, 116.7, 63.6, 42.5, 31.0, 28.6, 26.2, 24.1, 15.9, 7.4, 4.3; minor rotational isomer:  $\delta$  144.7, 139.6, 138.0, 126.5, 122.8, 113.9, 62.2, 40.9, 30.3, 28.4, 25.2, 24.4, 4.4. **HRMS (ESI-TOF)  $m/z$ :**  $[\text{M} + \text{H}]^+$  Calcd for  $\text{C}_{20}\text{H}_{34}\text{NOSi}$  332.2404; Found 332.2402.

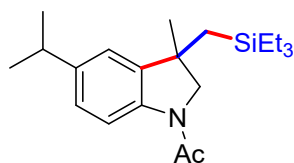

**1-(5-isopropyl-3-methyl-3-((triethylsilyl)methyl)indolin-1-yl)ethan-1-one (3da).** Light yellow liquid, 67% yield (116.1 mg). Column chromatography on silica gel (Petroleum ether/EtOAc = 10:1).  $^1\text{H NMR}$  (400 MHz,  $\text{CDCl}_3$ , ppm) present in 4.2:1 ratio of rotational isomers about the amide:  $\delta$  8.06 (d,  $J = 8.4$  Hz, 1 H), 7.06-6.97 (m, 2 H), 3.92-3.84 (m, 0.38 H), 3.82-3.71 (m, 1.61 H), 2.92-2.84 (m, 1 H), 2.42 (s, 0.57 H), 2.19 (s, 2.41 H), 1.40 (s, 2.46 H), 1.33 (s, 0.59 H), 1.24-1.22 (m, 6 H), 1.16 (d,  $J = 14.8$  Hz, 1 H), 1.07 (d,  $J = 15.2$  Hz, 1 H), 0.87 (t,  $J = 7.8$  Hz, 9 H), 0.49-0.34 (m, 6 H);  $^{13}\text{C NMR}$  (100 MHz,  $\text{CDCl}_3$ , ppm), major rotational isomer:  $\delta$  168.3, 144.6, 141.5, 139.2, 125.6, 120.0, 116.7, 63.7, 42.6, 34.0, 31.1, 26.3, 24.2, 24.1, 7.4, 4.3; minor rotational isomer:  $\delta$  144.5, 144.3, 138.1, 125.1, 121.3, 113.8, 62.3, 41.0, 33.8, 30.4, 25.3, 24.4, 4.4; **HRMS (ESI-TOF)  $m/z$ :**  $[\text{M} + \text{H}]^+$  Calcd for  $\text{C}_{21}\text{H}_{36}\text{NOSi}$  346.2561; Found 346.2560.

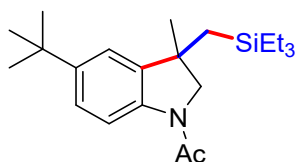

**1-(5-(tert-butyl)-3-methyl-3-((triethylsilyl)methyl)indolin-1-yl)ethan-1-one (3ea).**

Light yellow liquid, 64% yield (114.3 mg). Column chromatography on silica gel (Petroleum ether/EtOAc = 15:1).  $^1\text{H NMR}$  (400 MHz,  $\text{CDCl}_3$ , ppm) present in 4.0:1 ratio of rotational isomers about the amide:  $\delta$  8.07 (d,  $J = 8.4$  Hz, 1 H), 7.23-7.12 (m, 2 H), 3.92-3.85 (m, 0.40 H), 3.82-3.72 (m, 1.60 H), 2.42 (s, 0.60 H), 2.19 (s, 2.39 H), 1.40 (s, 2.44 H), 1.34 (s, 0.61 H), 1.30 (s, 9 H), 1.15 (d,  $J = 14.8$  Hz, 1 H), 1.08 (d,  $J = 15.2$  Hz, 1 H), 0.86 (t,  $J = 7.8$  Hz, 9 H), 0.49-0.32 (m, 6 H);  $^{13}\text{C NMR}$  (100 MHz,  $\text{CDCl}_3$ , ppm), major rotational isomer:  $\delta$  168.3, 146.9, 141.0, 138.9, 124.6, 118.8, 116.3, 63.7, 42.7, 34.6, 31.5, 31.3, 26.4, 24.1, 7.5, 4.3; minor rotational isomer:  $\delta$  146.5, 144.0, 137.8, 124.1, 120.2, 113.5, 62.3, 41.0, 34.5, 31.5, 30.6, 25.3, 24.4, 4.4; **HRMS (ESI-TOF)  $m/z$** :  $[\text{M} + \text{H}]^+$  Calcd for  $\text{C}_{22}\text{H}_{38}\text{NOSi}$  360.2717; Found 360.2717.

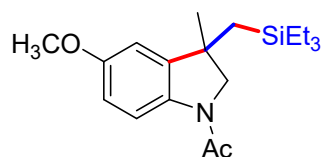

**1-(5-methoxy-3-methyl-3-((triethylsilyl)methyl)indolin-1-yl)ethan-1-one (3fa).**

Light brown liquid, 70% yield (116.0 mg). Column chromatography on silica gel (Petroleum ether/EtOAc = 5:1).  $^1\text{H NMR}$  (400 MHz,  $\text{CDCl}_3$ , ppm) present in 6.3:1 ratio of rotational isomers about the amide:  $\delta$  8.08 (d,  $J = 8.8$  Hz, 1 H), 6.74-6.67 (m, 2 H), 3.93-3.83 (m, 0.29 H), 3.81-3.71 (m, 4.83 H), 2.38 (s, 0.41 H), 2.17 (s, 2.59 H), 1.37 (s, 2.60 H), 1.30 (s, 0.41 H), 1.14 (d,  $J = 15.2$  Hz, 1 H), 1.04 (d,  $J = 14.8$  Hz, 1 H), 0.88 (t,  $J = 7.8$  Hz, 9 H), 0.52-0.36 (m, 6 H);  $^{13}\text{C NMR}$  (100 MHz,  $\text{CDCl}_3$ , ppm), major rotational isomer:  $\delta$  167.9, 156.5, 143.5, 134.9, 117.5, 111.9, 108.5, 63.5, 55.6, 42.6, 30.7, 26.0, 23.9, 7.4, 4.3; minor rotational isomer:  $\delta$  156.3, 146.4, 133.7, 114.7, 111.7, 109.6, 62.2, 55.5, 41.2, 30.0, 25.0, 24.1, 7.3, 4.4; **HRMS (ESI-TOF)  $m/z$** :  $[\text{M} + \text{H}]^+$  Calcd for  $\text{C}_{19}\text{H}_{32}\text{NO}_2\text{Si}$  334.2197; Found 334.2197.



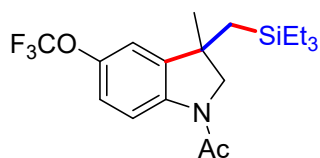

**1-(3-methyl-3-((triethylsilyl)methyl)-5-(trifluoromethoxy)indolin-1-yl)ethan-1-one (3ga).** Yellow liquid, 79% yield (153.7 mg). Column chromatography on silica gel (Petroleum ether/EtOAc = 10:1).  $^1\text{H NMR}$  (400 MHz,  $\text{CDCl}_3$ , ppm) present in 10.1:1 ratio of rotational isomers about the amide:  $\delta$  8.17 (d,  $J = 8.8$  Hz, 1 H), 7.04–7.01 (m, 1 H), 6.95 (s, 1 H), 3.92–3.90 (m, 0.18 H), 3.86–3.76 (m, 1.82 H), 2.42 (s, 0.27 H), 2.20 (s, 2.72 H), 1.39 (s, 2.72 H), 1.33 (s, 0.27 H), 1.15 (d,  $J = 14.8$  Hz, 1 H), 1.06 (d,  $J = 15.2$  Hz, 1 H), 0.88 (t,  $J = 8.0$  Hz, 9 H), 0.50–0.36 (m, 6 H);  $^{13}\text{C NMR}$  (100 MHz,  $\text{CDCl}_3$ , ppm):  $\delta$  168.7, 145.4, 143.7, 139.9, 120.6 (q,  $^1J_{\text{(C-F)}} = 254.7$  Hz), 120.4, 117.6, 115.5, 63.6, 42.7, 30.9, 26.2, 24.1, 7.4, 4.4;  $^{19}\text{F NMR}$  (376 MHz,  $\text{CDCl}_3$ , ppm):  $\delta$  -61.58; **HRMS (ESI-TOF)  $m/z$ :**  $[\text{M} + \text{H}]^+$  Calcd for  $\text{C}_{19}\text{H}_{29}\text{F}_3\text{NO}_2\text{Si}$  388.1914; Found 388.1914.

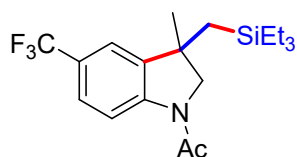

**1-(3-methyl-3-((triethylsilyl)methyl)-5-(trifluoromethyl)indolin-1-yl)ethan-1-one (3ha).** Yellow liquid, 43% yield (80.3 mg). Column chromatography on silica gel (Petroleum ether/EtOAc = 5:1).  $^1\text{H NMR}$  (400 MHz,  $\text{CDCl}_3$ , ppm) present in 10.5:1 ratio of rotational isomers about the amide:  $\delta$  8.25 (d,  $J = 8.4$  Hz, 1 H), 7.47–7.44 (m, 1 H), 7.35 (s, 1 H), 3.87 (d,  $J = 10.0$  Hz, 1 H), 3.80 (d,  $J = 10.0$  Hz, 1 H), 2.46 (s, 0.26 H), 2.23 (s, 2.74 H), 1.42 (s, 2.74 H), 1.36 (s, 0.26 H), 1.18 (d,  $J = 14.8$  Hz, 1 H), 1.08 (d,  $J = 14.8$  Hz, 1 H), 0.88 (t,  $J = 8.0$  Hz, 9 H), 0.52–0.35 (m, 6 H);  $^{13}\text{C NMR}$  (100 MHz,  $\text{CDCl}_3$ , ppm):  $\delta$  169.2, 143.9, 142.4, 125.7 (q,  $^2J_{\text{(C-F)}} = 32.0$  Hz), 125.3 (d,  $^3J_{\text{(C-F)}} = 3.6$  Hz), 124.4 (q,  $^1J_{\text{(C-F)}} = 270.0$  Hz), 119.2 (d,  $^3J_{\text{(C-F)}} = 3.4$  Hz), 116.6, 63.5, 42.6, 30.9, 26.2, 24.2, 7.3, 4.3;  $^{19}\text{F NMR}$  (376 MHz,  $\text{CDCl}_3$ , ppm):  $\delta$  -58.12; **HRMS (ESI-TOF)  $m/z$ :**  $[\text{M} + \text{H}]^+$  Calcd for  $\text{C}_{19}\text{H}_{29}\text{F}_3\text{NOSi}$  372.1965; Found 372.1964.

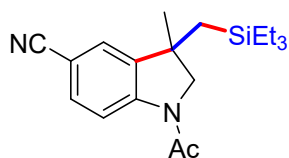

**1-acetyl-3-methyl-3-((triethylsilyl)methyl)indoline-5-carbonitrile (3ia).** Colorless liquid, 48% yield (78.5 mg). Column chromatography on silica gel (Petroleum ether/EtOAc = 7:1).  $^1\text{H NMR}$  (400 MHz,  $\text{CDCl}_3$ , ppm)  $\delta$  8.22 (d,  $J = 8.4$  Hz, 1 H), 7.48-7.45 (m, 1 H), 7.37 (s, 1 H), 3.85 (d,  $J = 10.0$  Hz, 1 H), 3.78 (d,  $J = 10.0$  Hz, 1 H), 2.22 (s, 3 H), 1.38 (s, 3 H), 1.16 (d,  $J = 15.2$  Hz, 1 H), 1.03 (d,  $J = 15.2$  Hz, 1 H), 0.88 (t,  $J = 8.0$  Hz, 9 H), 0.50-0.36 (m, 6 H);  $^{13}\text{C NMR}$  (100 MHz,  $\text{CDCl}_3$ , ppm):  $\delta$  169.4, 144.8, 143.1, 132.7, 126.0, 119.3, 117.1, 106.5, 63.3, 42.6, 30.7, 26.2, 24.3, 7.4, 4.4; **HRMS (ESI-TOF)**  $m/z$ :  $[\text{M} + \text{H}]^+$  Calcd for  $\text{C}_{19}\text{H}_{29}\text{N}_2\text{OSi}$  329.2044; Found 329.2042.

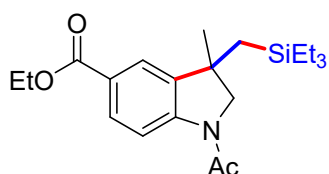

**ethyl 1-acetyl-3-methyl-3-((triethylsilyl)methyl)indoline-5-carboxylate (3ja).** Yellow liquid, 41% yield (76.9 mg). Column chromatography on silica gel (Petroleum ether/EtOAc = 7:1).  $^1\text{H NMR}$  (400 MHz,  $\text{CDCl}_3$ , ppm) present in 9.2:1 ratio of rotational isomers about the amide:  $\delta$  8.18 (d,  $J = 8.4$  Hz, 1 H), 7.91-7.89 (m, 1 H), 7.80 (s, 1 H), 4.37-4.31 (m, 2 H), 3.87-3.77 (m, 2 H), 2.45 (s, 0.30 H), 2.22 (s, 2.75 H), 1.40-1.36 (m, 6 H), 1.20 (d,  $J = 14.8$  Hz, 1 H), 1.07 (d,  $J = 15.2$  Hz, 1 H), 0.87 (t,  $J = 7.8$  Hz, 9 H), 0.50-0.37 (m, 6 H);  $^{13}\text{C NMR}$  (100 MHz,  $\text{CDCl}_3$ , ppm):  $\delta$  169.2, 166.4, 145.0, 142.1, 130.1, 125.8, 123.6, 116.1, 63.7, 60.8, 42.4, 30.9, 26.2, 24.3, 14.4, 7.4, 4.4; **HRMS (ESI-TOF)**  $m/z$ :  $[\text{M} + \text{H}]^+$  Calcd for  $\text{C}_{21}\text{H}_{34}\text{NO}_3\text{Si}$  376.2302; Found 376.2304.

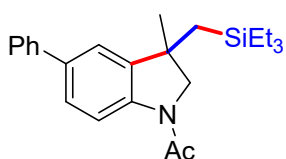

**1-(3-methyl-5-phenyl-3-((triethylsilyl)methyl)indolin-1-yl)ethan-1-one (3la).** Yellow liquid, 67% yield (127.4 mg). Column chromatography on silica gel

(Petroleum ether/EtOAc = 10:1). **<sup>1</sup>H NMR** (400 MHz, CDCl<sub>3</sub>, ppm) present in 5.4:1 ratio of rotational isomers about the amide: δ 8.26 (d, *J* = 8.4 Hz, 1 H), 7.60-7.58 (m, 2 H), 7.46-7.30 (m, 5 H), 4.00-3.92 (m, 0.31 H), 3.89-3.79 (m, 1.68 H), 2.48 (s, 0.47 H), 2.24 (s, 2.55 H), 1.46 (s, 2.54 H), 1.40 (s, 0.47 H), 1.24 (d, *J* = 14.8 Hz, 1 H), 1.15 (d, *J* = 15.2 Hz, 1 H), 0.92 (t, *J* = 8.0 Hz, 9 H), 0.58-0.40 (m, 6 H); **<sup>13</sup>C NMR** (100 MHz, CDCl<sub>3</sub>, ppm): δ 168.6, 142.5, 141.2, 140.7, 137.0, 128.8, 126.9 (2 C), 126.7, 120.8, 117.1, 63.7, 42.7, 31.0, 26.4, 24.2, 7.5, 4.4; **HRMS (ESI-TOF)** *m/z*: [M + H]<sup>+</sup> Calcd for C<sub>24</sub>H<sub>34</sub>NOSi 380.2404; Found 380.2402.

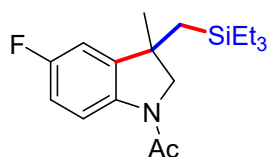

**1-(5-fluoro-3-methyl-3-((triethylsilyl)methyl)indolin-1-yl)ethan-1-one (3ma).**

White solid, 83% yield (132.7 mg). Column chromatography on silica gel (Petroleum ether/EtOAc = 10:1). M.p. = 32-34 °C. **<sup>1</sup>H NMR** (400 MHz, CDCl<sub>3</sub>, ppm) present in 9.0:1 ratio of rotational isomers about the amide: δ 8.14-8.11 (m, 1 H), 6.88-6.80 (m, 2 H), 3.96-3.85 (m, 0.20 H), 3.85-3.74 (m, 1.80 H), 2.40 (s, 0.30 H), 2.19 (s, 2.70 H), 1.38 (s, 2.69 H), 1.31 (s, 0.30 H), 1.14 (d, *J* = 14.8 Hz, 1 H), 1.04 (d, *J* = 15.2 Hz, 1 H), 0.89 (t, *J* = 7.8 Hz, 9 H), 0.52-0.42 (m, 6 H); **<sup>13</sup>C NMR** (100 MHz, CDCl<sub>3</sub>, ppm): δ 168.3, 159.6 (d, <sup>1</sup>*J*<sub>(C-F)</sub> = 240.6 Hz), 144.0 (d, <sup>3</sup>*J*<sub>(C-F)</sub> = 7.1 Hz), 137.2 (d, <sup>4</sup>*J*<sub>(C-F)</sub> = 1.8 Hz), 117.8 (d, <sup>3</sup>*J*<sub>(C-F)</sub> = 7.8 Hz), 113.7 (d, <sup>2</sup>*J*<sub>(C-F)</sub> = 22.5 Hz), 109.3 (d, <sup>2</sup>*J*<sub>(C-F)</sub> = 27.3 Hz), 63.4, 42.6, 30.6, 26.0, 23.9, 7.4, 4.3; **<sup>19</sup>F NMR** (376 MHz, CDCl<sub>3</sub>, ppm): δ -118.83; **HRMS (ESI-TOF)** *m/z*: [M + H]<sup>+</sup> Calcd for C<sub>18</sub>H<sub>29</sub>FNOSi 322.1997; Found 322.1995.

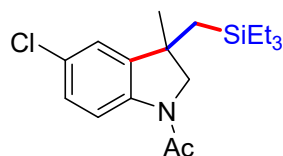

**1-(5-chloro-3-methyl-3-((triethylsilyl)methyl)indolin-1-yl)ethan-1-one (3na).**

Yellow liquid, 90% yield (151.5 mg). Column chromatography on silica gel (Petroleum ether/EtOAc = 7:1). **<sup>1</sup>H NMR** (400 MHz, CDCl<sub>3</sub>, ppm) present in 8.7:1 ratio of rotational isomers about the amide: δ 8.10 (d, *J* = 8.4 Hz, 1 H), 7.15-7.07 (m,

2 H), 3.94-3.84 (m, 0.21 H), 3.84-3.74 (m, 1.81 H), 2.41 (s, 0.31 H), 2.20 (s, 2.70 H), 1.38 (s, 2.70 H), 1.32 (s, 0.31 H), 1.15 (d,  $J = 15.2$  Hz, 1 H), 1.04 (d,  $J = 15.2$  Hz, 1 H), 0.90 (t,  $J = 8.0$  Hz, 9 H), 0.53-0.38 (m, 6 H);  $^{13}\text{C}$  NMR (100 MHz,  $\text{CDCl}_3$ , ppm):  $\delta$  168.6, 143.9, 139.7, 128.6, 127.4, 122.4, 117.8, 63.4, 42.6, 30.6, 26.1, 24.0, 7.4, 4.3; **HRMS (ESI-TOF)**  $m/z$ :  $[\text{M} + \text{H}]^+$  Calcd for  $\text{C}_{18}\text{H}_{29}\text{ClNOSi}$  338.1701; Found 338.1700.

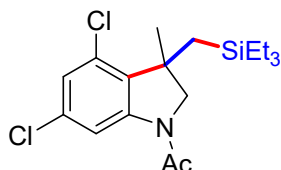

**1-(4,6-dichloro-3-methyl-3-((triethylsilyl)methyl)indolin-1-yl)ethan-1-one (3pa).**

Colorless liquid, 47% yield (88.4 mg). Column chromatography on silica gel (Petroleum ether/EtOAc = 7:1).  $^1\text{H}$  NMR (400 MHz,  $\text{CDCl}_3$ , ppm):  $\delta$  8.21 (d,  $J = 1.2$  Hz, 1 H), 6.95 (d,  $J = 2.0$  Hz, 1 H), 3.84 (d,  $J = 10.4$  Hz, 1 H), 3.74 (d,  $J = 10.4$  Hz, 1 H), 2.18 (s, 3 H), 1.54 (s, 3 H), 1.38-1.29 (m, 2 H), 0.88 (t,  $J = 7.8$  Hz, 9 H), 0.45-0.40 (m, 6 H);  $^{13}\text{C}$  NMR (100 MHz,  $\text{CDCl}_3$ , ppm):  $\delta$  168.9, 143.8, 135.4, 133.9, 130.3, 124.9, 115.9, 64.1, 43.9, 28.8, 24.3, 23.7, 7.4, 4.3; **HRMS (ESI-TOF)**  $m/z$ :  $[\text{M} + \text{H}]^+$  Calcd for  $\text{C}_{18}\text{H}_{28}\text{Cl}_2\text{NOSi}$  372.1312; Found 372.1307.

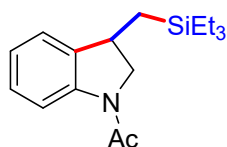

**1-(3-((triethylsilyl)methyl)indolin-1-yl)ethan-1-one (3qa).**

White solid, 67% yield (97.0 mg). Column chromatography on silica gel (Petroleum ether/EtOAc = 7:1). M.p. = 51-53 °C.  $^1\text{H}$  NMR (400 MHz,  $\text{CDCl}_3$ , ppm) present in 4.6:1 ratio of rotational isomers about the amide:  $\delta$  8.17 (d,  $J = 8.0$  Hz, 1 H), 7.23-7.01 (m, 3 H), 4.39 (t,  $J = 10.6$  Hz, 0.18 H), 4.16 (t,  $J = 9.2$  Hz, 0.82 H), 3.57-3.31 (m, 2 H), 2.42 (s, 0.53 H), 2.21 (s, 2.46 H), 1.23-1.18 (m, 1 H), 0.98 (t,  $J = 7.8$  Hz, 9 H), 0.88-0.82 (m, 1 H), 0.63-0.56 (m, 6 H);  $^{13}\text{C}$  NMR (100 MHz,  $\text{CDCl}_3$ , ppm):  $\delta$  168.5, 141.9, 137.9, 127.6, 123.7, 123.3, 116.8, 57.2, 36.4, 24.2, 18.3, 7.4, 3.9; **HRMS (ESI-TOF)**  $m/z$ :  $[\text{M} + \text{H}]^+$  Calcd for  $\text{C}_{17}\text{H}_{28}\text{NOSi}$  290.1935; Found 290.1932.

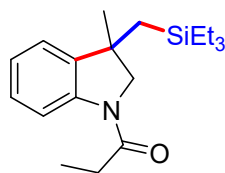

**1-(3-methyl-3-((triethylsilyl)methyl)indolin-1-yl)propan-1-one (3ra).** Yellow liquid, 79% yield (124.9 mg). Column chromatography on silica gel (Petroleum ether/EtOAc = 10:1).  $^1\text{H NMR}$  (400 MHz,  $\text{CDCl}_3$ , ppm) present in 7.1:1 ratio of rotational isomers about the amide:  $\delta$  8.20 (d,  $J = 8.0$  Hz, 1 H), 7.20-7.12 (m, 2 H), 7.04-7.00 (m, 1 H),  $\delta$  3.93-3.86 (m, 0.24 H), 3.82-3.71 (m, 1.71 H), 2.69 (s, 0.24 H), 2.45-2.39 (m, 1.71 H), 1.38 (s, 2.64 H), 1.33 (s, 0.37 H), 1.23 (t,  $J = 7.4$  Hz, 3 H), 1.17 (d,  $J = 15.2$  Hz, 1 H), 1.06 (d,  $J = 15.2$  Hz, 1 H), 0.88 (t,  $J = 7.8$  Hz, 9 H), 0.49-0.39 (m, 6 H);  $^{13}\text{C NMR}$  (100 MHz,  $\text{CDCl}_3$ , ppm):  $\delta$  171.9, 141.7, 141.4, 127.6, 123.6, 122.0, 116.8, 62.4, 42.6, 30.9, 29.2, 26.1, 8.7, 7.4, 4.4; **HRMS (ESI-TOF)  $m/z$ :**  $[\text{M} + \text{H}]^+$  Calcd for  $\text{C}_{19}\text{H}_{32}\text{NOSi}$  318.2248; Found 318.2245.

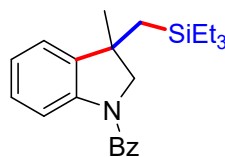

**(3-methyl-3-((triethylsilyl)methyl)indolin-1-yl)(phenyl)methanone (3sa).** Colorless liquid, 45% yield (81.7 mg). Column chromatography on silica gel (Petroleum ether/EtOAc = 10:1).  $^1\text{H NMR}$  (400 MHz,  $\text{CDCl}_3$ , ppm)  $\delta$  8.08 (s, 1 H), 7.63-7.61 (m, 2 H), 7.55-7.52 (m, 3 H), 7.32-7.30 (m, 1 H), 7.21-7.15 (m, 1 H), 7.10-7.06 (m, 1 H), 3.91-3.85 (m, 2 H), 1.41 (s, 3 H), 1.23(d,  $J = 14.9$  Hz, 1 H), 1.11 (d,  $J = 14.9$  Hz, 1 H), 0.86 (t,  $J = 7.9$  Hz, 9 H), 0.49-0.38 (m, 6 H);  $^{13}\text{C NMR}$  (100 MHz,  $\text{CDCl}_3$ , ppm):  $\delta$  168.0, 143.0, 141.5, 137.6, 130.1, 128.4, 127.1, 127.0, 123.9, 122.5, 116.7, 64.6, 42.4, 29.5, 25.2, 6.8, 4.0; **HRMS (ESI-TOF)  $m/z$ :**  $[\text{M} + \text{H}]^+$  Calcd for  $\text{C}_{23}\text{H}_{32}\text{NOSi}$  366.2248; Found 366.2244.

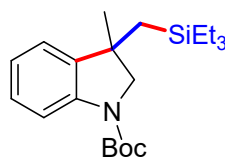

**tert-butyl 3-methyl-3-((triethylsilyl)methyl)indoline-1-carboxylate (3ta).** Colorless liquid, 54% yield (97.6 mg). Column chromatography on silica gel (Petroleum

ether/EtOAc = 100:1). **<sup>1</sup>H NMR** (400 MHz, CDCl<sub>3</sub>, ppm): δ 7.62 (s, 1 H), 7.17-7.10 (m, 2 H), 6.97-6.93 (m, 1 H), 3.78-3.65 (m, 2 H), 1.56 (s, 9 H), 1.36 (s, 3 H), 1.11-1.00 (m, 2 H), 0.87 (t, *J* = 8.0 Hz, 9 H), 0.43 (s, 6 H); **<sup>13</sup>C NMR** (100 MHz, CDCl<sub>3</sub>, ppm): δ 152.5, 142.6, 141.4, 127.4, 122.3, 114.6, 80.4, 61.9, 41.7, 30.8 (2 C), 28.5, 26.7, 7.4, 4.3; **HRMS (ESI-TOF)** *m/z*: [M + Na]<sup>+</sup> Calcd for C<sub>21</sub>H<sub>36</sub>NO<sub>2</sub>SiNa 384.2329; Found 384.2325.

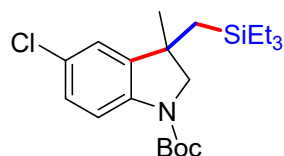

**tert-butyl 5-chloro-3-methyl-3-((triethylsilyl)methyl)indoline-1-carboxylate (3ua).**

Yellow liquid, 90% yield (178.6 mg). Column chromatography on silica gel (Petroleum ether/EtOAc = 100:1). **<sup>1</sup>H NMR** (400 MHz, CDCl<sub>3</sub>, ppm): δ 7.53 (s, 1 H), 7.11-7.04 (m, 2 H), 3.78-3.65 (m, 2 H), 1.55 (s, 9 H), 1.35 (s, 3 H), 1.10 (d, *J* = 14.4 Hz, 1 H), 1.00 (d, *J* = 14.8 Hz, 1 H), 0.88 (t, *J* = 8.0 Hz, 9 H), 0.46-0.44 (m, 6 H); **<sup>13</sup>C NMR** (100 MHz, CDCl<sub>3</sub>, ppm): δ 152.3, 143.5, 140.0, 127.3, 122.6, 115.6, 80.7, 62.1, 41.8, 30.5 (2 C), 28.4, 26.5, 7.4, 4.3; **HRMS (ESI-TOF)** *m/z*: [M + Na]<sup>+</sup> Calcd for C<sub>21</sub>H<sub>35</sub>ClNO<sub>2</sub>SiNa 418.1940; Found 418.1939.

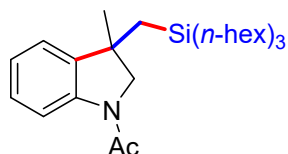

**1-(3-methyl-3-((trihexylsilyl)methyl)indolin-1-yl)ethan-1-one (3ab).** Light yellow liquid, 58% yield (136.5 mg). Column chromatography on silica gel (Petroleum ether/EtOAc = 7:1). **<sup>1</sup>H NMR** (400 MHz, CDCl<sub>3</sub>, ppm) present in 5.3:1 ratio of rotational isomers about the amide: δ 8.17 (d, *J* = 8.0 Hz, 1 H), 7.20-7.12 (m, 2 H), 7.05-7.01 (m, 1 H), 3.92-3.85 (m, 0.31 H), 3.83-3.72 (m, 1.66 H), 2.44 (s, 0.48 H), 2.21 (s, 2.55 H), 1.39-1.14 (m, 28 H), 1.05 (d, *J* = 14.8 Hz, 1 H), 0.88 (t, *J* = 6.8 Hz, 9 H), 0.48-0.34 (m, 6 H); **<sup>13</sup>C NMR** (100 MHz, CDCl<sub>3</sub>, ppm): δ 168.5, 141.8, 141.2, 127.6, 123.8, 122.0, 116.9, 63.4, 42.6, 33.6, 31.5, 31.0, 27.2, 24.2, 23.8, 22.6, 14.1, 13.6; **HRMS (ESI-TOF)** *m/z*: [M + H]<sup>+</sup> Calcd for C<sub>30</sub>H<sub>54</sub>NOSi 472.3969; Found 472.3970.

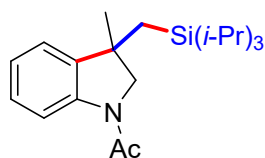

**1-(3-methyl-3-((triisopropylsilyl)methyl)indolin-1-yl)ethan-1-one (3ac).** Colorless liquid, 31% yield (54.3 mg). Column chromatography on silica gel (Petroleum ether/EtOAc = 10:1).  $^1\text{H NMR}$  (400 MHz,  $\text{CDCl}_3$ , ppm) present in 5.1:1 ratio of rotational isomers about the amide:  $\delta$  8.17 (d,  $J = 8.0$  Hz, 1 H), 7.24-7.16 (m, 2 H), 7.10-7.03 (m, 1 H), 4.01-3.92 (m, 0.33 H), 3.92-3.76 (m, 1.67 H), 2.44 (s, 0.49 H), 2.21 (s, 2.51 H), 1.41 (s, 2.51 H), 1.36 (s, 0.49 H), 1.28 (d,  $J = 15.2$  Hz, 1 H), 1.15 (d,  $J = 15.2$  Hz, 1 H), 1.06-1.03 (m, 21 H);  $^{13}\text{C NMR}$  (100 MHz,  $\text{CDCl}_3$ , ppm):  $\delta$  168.6, 142.8, 140.9, 127.6, 123.9, 121.9, 116.9, 63.6, 42.5, 31.0, 24.3, 23.4, 19.1, 19.0, 11.9; **HRMS (ESI-TOF)  $m/z$ :**  $[\text{M} + \text{Na}]^+$  Calcd for  $\text{C}_{21}\text{H}_{36}\text{NOSiNa}$  368.2380; Found 368.2378.

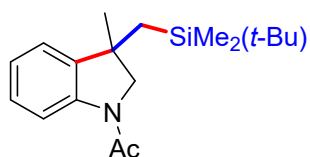

**1-(3-((tert-butyl dimethylsilyl)methyl)-3-methylindolin-1-yl)ethan-1-one (3ad).** Colorless liquid, 25% yield (37.8 mg). Column chromatography on silica gel (Petroleum ether/EtOAc = 10:1).  $^1\text{H NMR}$  (400 MHz,  $\text{CDCl}_3$ , ppm) present in 5.1:1 ratio of rotational isomers about the amide:  $\delta$  8.18 (d,  $J = 8.0$  Hz, 1 H), 7.21-7.17 (m, 1 H), 7.13-7.09 (m, 1 H), 7.06-7.02 (m, 1 H), 3.97-3.83 (m, 0.33 H), 3.83-3.74 (m, 1.67 H), 2.44 (s, 0.49 H), 2.21 (s, 2.49 H), 1.40 (s, 2.49 H), 1.34 (s, 0.49 H), 1.18-1.08 (m, 2 H), 0.83 (s, 9 H), 0.00 (s, 3 H), -0.18 (s, 0.50 H), -0.25 (s, 2.50 H);  $^{13}\text{C NMR}$  (100 MHz,  $\text{CDCl}_3$ , ppm):  $\delta$  168.6, 141.7, 141.2, 127.7, 123.8, 122.2, 116.9, 63.2, 42.5, 31.4, 26.4, 26.2, 24.3, 16.5, -4.1, -4.9; **HRMS (ESI-TOF)  $m/z$ :**  $[\text{M} + \text{H}]^+$  Calcd for  $\text{C}_{18}\text{H}_{30}\text{NOSi}$  304.2091; Found 304.2092.

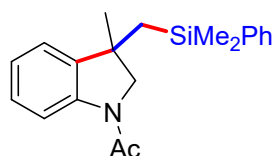

**1-(3-((dimethyl(phenyl)silyl)methyl)-3-methylindolin-1-yl)ethan-1-one (3ae).** Colorless liquid, 77% yield (125.0 mg). Column chromatography on silica gel

(Petroleum ether/EtOAc = 7:1). **<sup>1</sup>H NMR** (400 MHz, CDCl<sub>3</sub>, ppm) present in 9.2:1 ratio of rotational isomers about the amide: δ 8.18 (d, *J* = 8.0 Hz, 1 H), 7.46-7.35 (m, 5 H), 7.22-7.18 (m, 1 H), 7.12-7.10 (m, 1 H), 7.04-7.00 (m, 1 H), 3.90-3.80 (m, 0.19 H), 3.54-3.42 (m, 1.75 H), 2.39 (s, 0.29 H), 1.72 (s, 2.67 H), 1.42-1.27 (m, 5 H), 0.25 (s, 0.29 H), 0.19 (s, 3 H), -0.02 (s, 2.67 H); **<sup>13</sup>C NMR** (100 MHz, CDCl<sub>3</sub>, ppm): δ 169.9, 142.7, 142.0, 140.2, 134.7, 130.3, 129.1, 128.9, 124.9, 123.4, 118.0, 63.5, 43.7, 33.1, 32.7, 24.9, -0.0, -1.7; **HRMS (ESI-TOF)** *m/z*: [M + H]<sup>+</sup> Calcd for C<sub>20</sub>H<sub>26</sub>NOSi 324.1778; Found 324.1774.

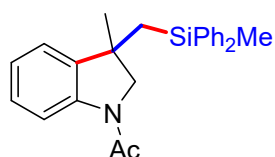

**1-(3-methyl-3-((methyldiphenylsilyl)methyl)indolin-1-yl)ethan-1-one (3af).**

Colorless liquid, 66% yield (128.0 mg). Column chromatography on silica gel (Petroleum ether/EtOAc = 7:1). **<sup>1</sup>H NMR** (400 MHz, CDCl<sub>3</sub>, ppm) present in 12.6:1 ratio of rotational isomers about the amide: δ 8.17 (d, *J* = 8.0 Hz, 1 H), 7.50-7.30 (m, 10 H), 7.24-7.14 (m, 2 H), 7.05-7.02 (m, 1 H), 3.90-3.75 (m, 0.15 H), 3.57-3.38 (m, 1.85 H), 2.33 (s, 0.22 H), 1.77 (d, *J* = 15.2 Hz, 1 H), 1.63 (d, *J* = 14.8 Hz, 1 H), 1.58 (s, 2.78 H), 1.45 (s, 2.78 H), 1.31 (s, 0.22 H), 0.47 (s, 0.22 H), 0.19 (s, 2.78 H); **<sup>13</sup>C NMR** (100 MHz, CDCl<sub>3</sub>, ppm): δ 168.8, 141.6, 140.7, 137.7, 136.8, 134.6, 134.3, 129.5, 129.3, 128.0, 127.9 (2 C), 123.8, 122.3, 116.9, 62.2, 42.5, 31.7, 29.8, 23.6, -3.9; **HRMS (ESI-TOF)** *m/z*: [M + H]<sup>+</sup> Calcd for C<sub>25</sub>H<sub>28</sub>NOSi 386.1935; Found 386.1933.

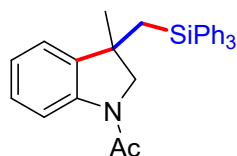

**1-(3-methyl-3-((triphenylsilyl)methyl)indolin-1-yl)ethan-1-one (3ag).**

White solid, 78% yield (175.4 mg). Column chromatography on silica gel (Petroleum ether/EtOAc = 15:1). M.p. = 156-158 °C. **<sup>1</sup>H NMR** (400 MHz, CDCl<sub>3</sub>, ppm) present in 14.0:1 ratio of rotational isomers about the amide: δ 8.11-8.09 (m, 1 H), 7.58-7.56 (m, 6 H), 7.44-7.35 (m, 9 H), 7.17-7.14 (m, 2 H), 6.99-6.95 (m, 1 H), 3.76-3.65 (m, 0.13 H), 3.51-3.18 (m, 1.90 H), 2.29 (s, 0.20 H), 2.16 (d, *J* = 15.2 Hz, 1 H), 1.95 (d, *J* = 15.2 Hz, 1



H), 1.71 (s, 2.80 H), 1.32 (s, 2.80 H), 1.28 (s, 0.20 H);  $^{13}\text{C}$  NMR (100 MHz,  $\text{CDCl}_3$ , ppm):  $\delta$  168.6, 142.0, 141.0, 135.8, 134.8, 129.7, 128.1, 127.7, 123.8, 122.1, 116.8, 62.5, 42.7, 30.9, 27.0, 23.8; HRMS (ESI-TOF)  $m/z$ :  $[\text{M} + \text{H}]^+$  Calcd for  $\text{C}_{30}\text{H}_{30}\text{NOSi}$  448.2091; Found 448.2093.

## 5. Radical trapping experiment

To study the reaction mechanism, several control experiments were carried out under the optimized reaction conditions (Scheme S2). When 2.0 equiv. of TEMPO (2,2,6,6-tetramethyl-1-piperidinyloxy) was added to the system, the reaction was completely inhibited. By adding 2.0 equiv. of radical scavenger 1,1-diphenylethylene to the reaction mixture, the reaction was totally suppressed and corresponding adducts **4** and **5** could be detected by GC-MS. When 2.0 equiv. of BHT (2,6-di-tert-butyl-4-methylphenol) was added to the reaction, no target product was obtained and GC-MS analysis indicated that compounds **6** and **7** were formed. These results showed that the reaction system proceeded in a free radical way.

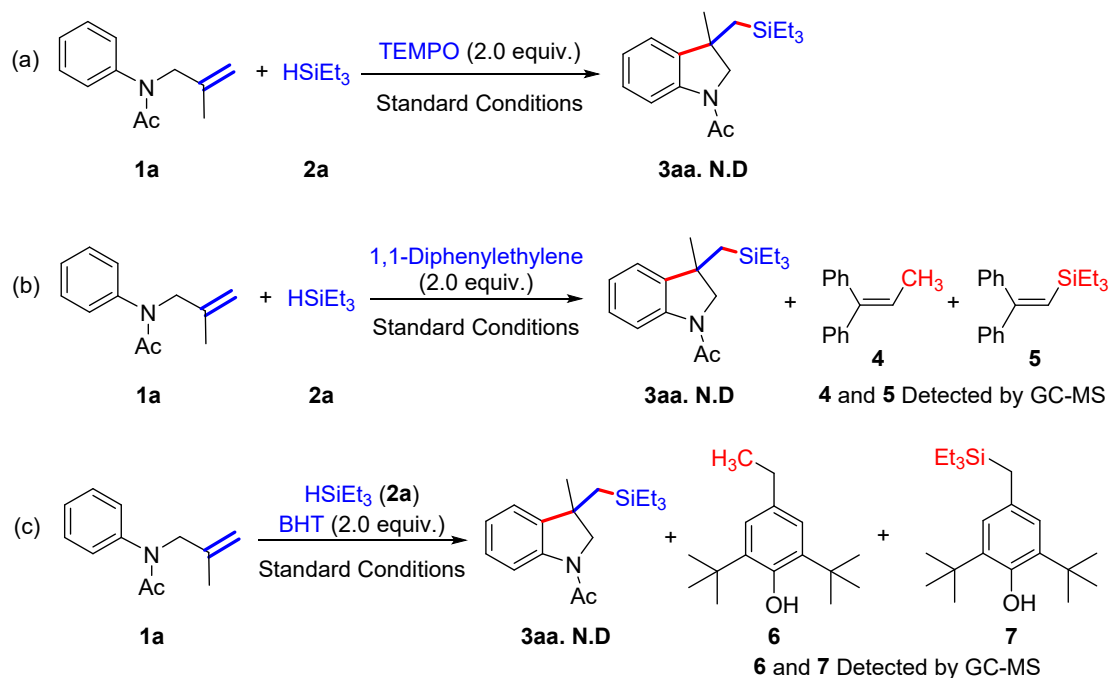

Scheme S2. Radical trapping experiment

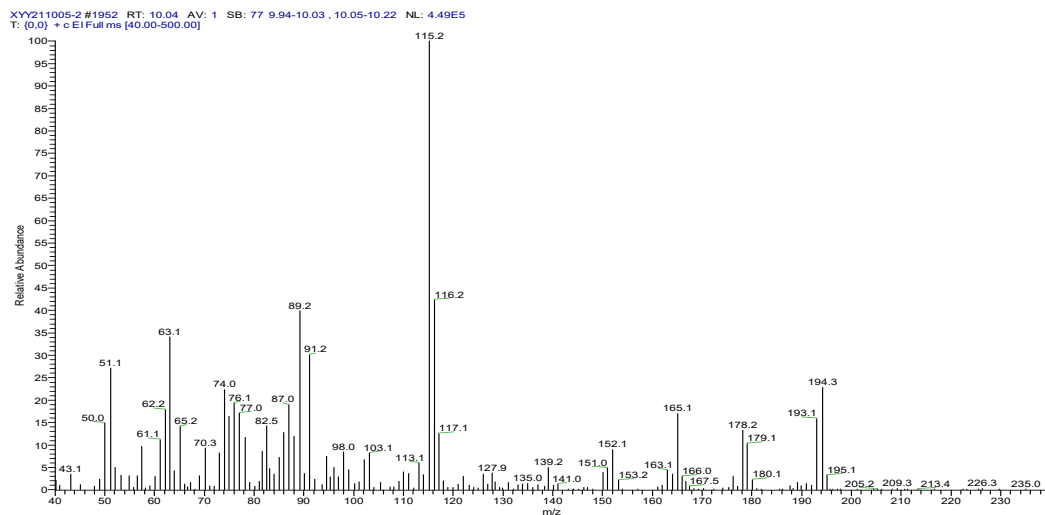

**Figure S1. GC-MS (EI, m/z) of compound 4**

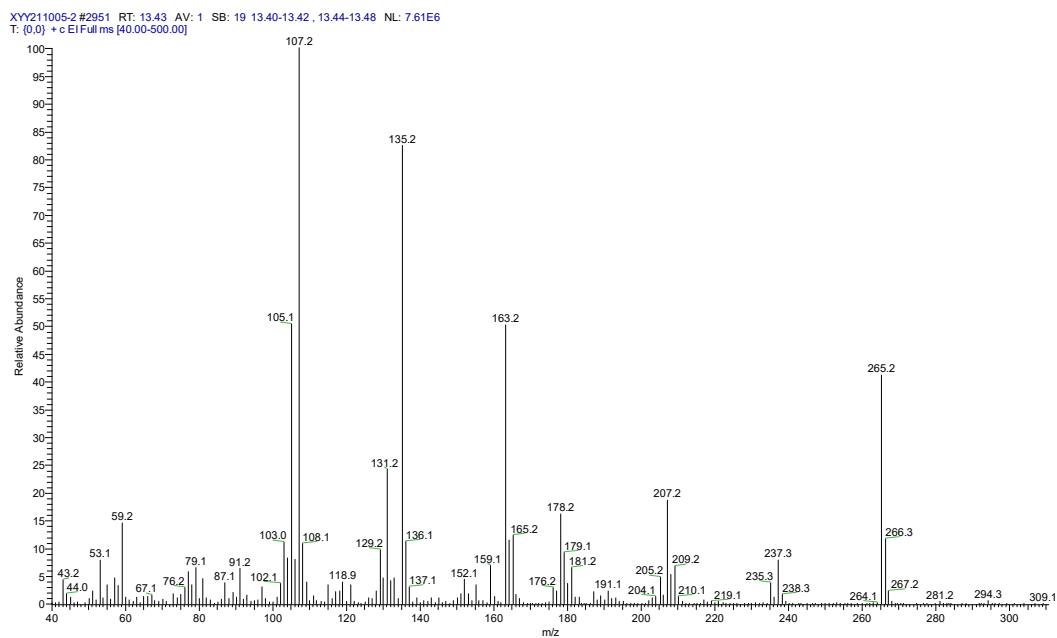

**Figure S2. GC-MS (EI, m/z) of compound 5**

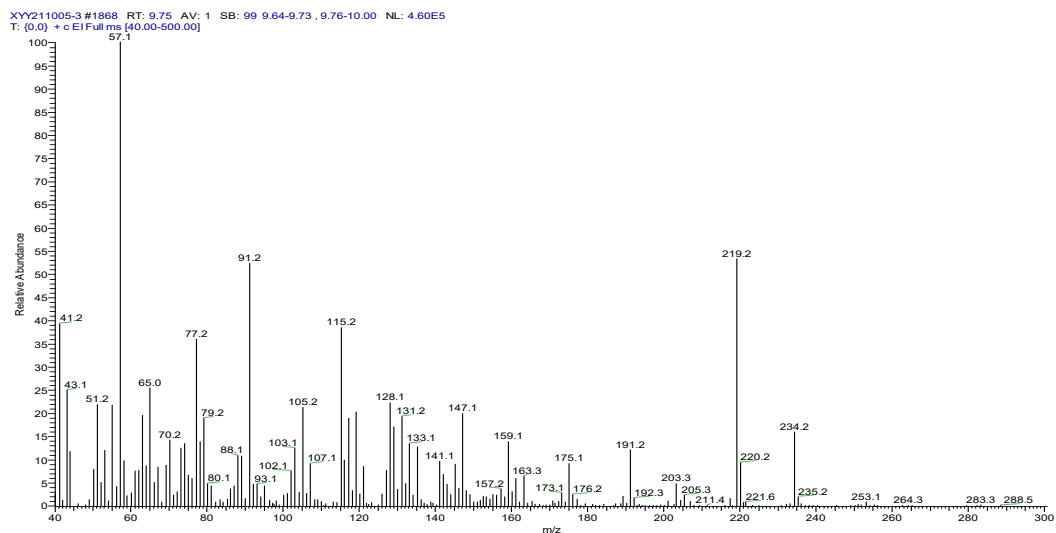

**Figure S3. GC-MS (EI, m/z) of compound 6**

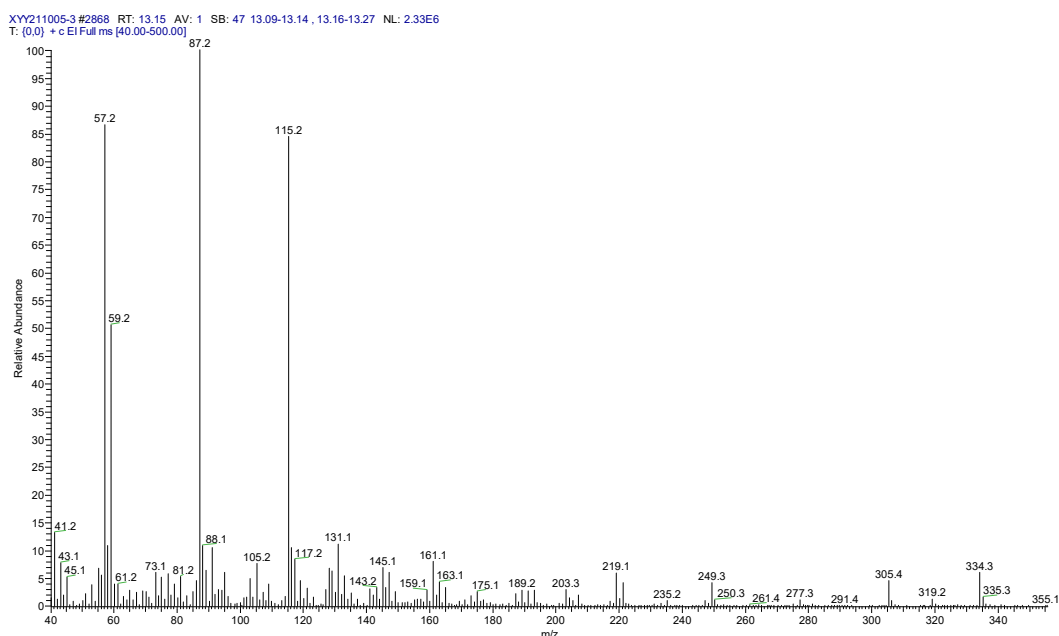

**Figure S4. GC-MS (EI, m/z) of compound 7**

## 6. X-Ray crystallographic data of 3aa

The product **3aa** was recrystallized from petroleum ether. Further information can be found in the CIF file. This crystal was deposited in the Cambridge Crystallographic Data Centre and assigned as **CCDC2120950**.

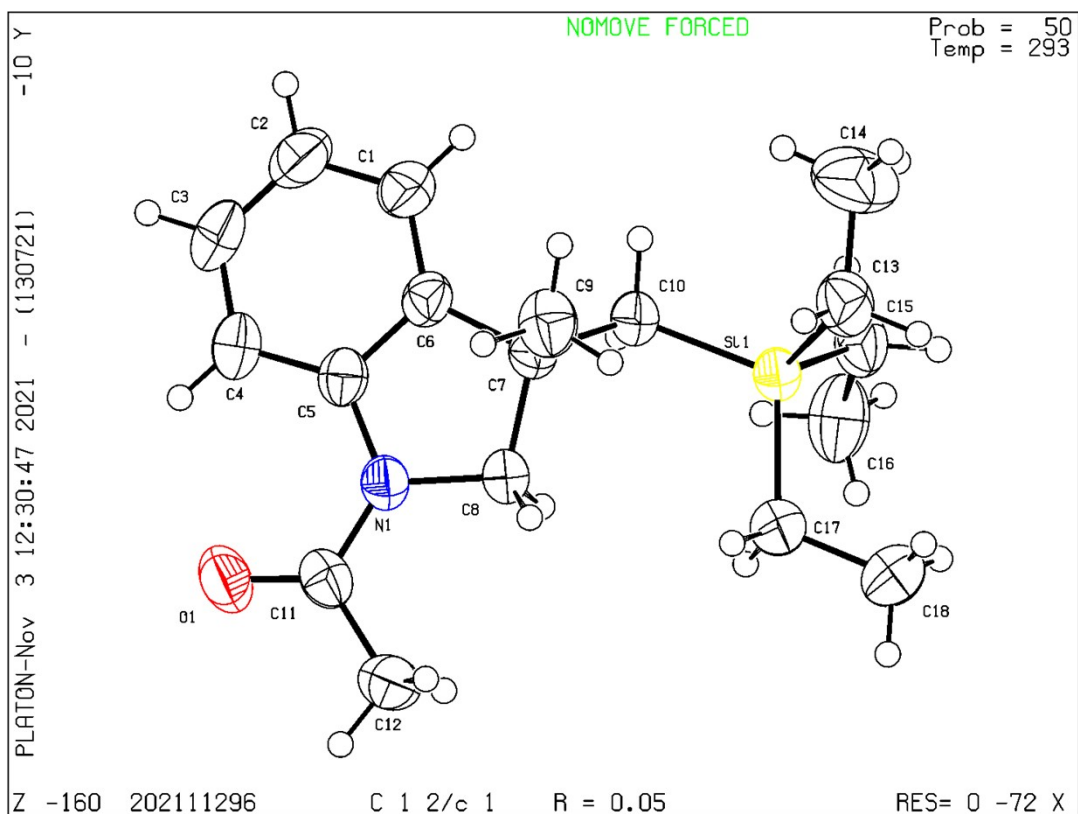

**Figure S5. Single-crystal X-ray Molecular Structure of 3aa**

**Table S2. Crystal data and structure refinement for 3aa**

|                                  |                                            |
|----------------------------------|--------------------------------------------|
| Identification code              | <b>3aa</b>                                 |
| Empirical formula                | $C_{18}H_{29}NOSi$                         |
| Formula weight                   | 303.51                                     |
| Temperature/K                    | 293(2)                                     |
| Crystal system                   | monoclinic                                 |
| Space group                      | $C2/c$                                     |
| $a/\text{\AA}$                   | 22.3463(8)                                 |
| $b/\text{\AA}$                   | 7.5222(3)                                  |
| $c/\text{\AA}$                   | 22.4194(11)                                |
| $\alpha/^\circ$                  | 90                                         |
| $\beta/^\circ$                   | 102.133(4)                                 |
| $\gamma/^\circ$                  | 90                                         |
| Volume/ $\text{\AA}^3$           | 3684.4(3)                                  |
| Z                                | 8                                          |
| $\rho_{\text{calc}}/\text{cm}^3$ | 1.094                                      |
| $\mu/\text{mm}^{-1}$             | 1.104                                      |
| F(000)                           | 1328.0                                     |
| Crystal size/ $\text{mm}^3$      | $0.18 \times 0.08 \times 0.06$             |
| Radiation                        | $\text{CuK}\alpha$ ( $\lambda = 1.54184$ ) |

|                                                  |                                                                  |
|--------------------------------------------------|------------------------------------------------------------------|
| 2 $\theta$ range for data collection/ $^{\circ}$ | 8.068 to 134.14                                                  |
| Index ranges                                     | $-26 \leq h \leq 26$ , $-5 \leq k \leq 8$ , $-26 \leq l \leq 26$ |
| Reflections collected                            | 12393                                                            |
| Independent reflections                          | 3274 [ $R_{\text{int}} = 0.0402$ , $R_{\text{sigma}} = 0.0365$ ] |
| Data/restraints/parameters                       | 3274/0/195                                                       |
| Goodness-of-fit on $F^2$                         | 1.037                                                            |
| Final R indexes [ $I \geq 2\sigma(I)$ ]          | $R_1 = 0.0470$ , $wR_2 = 0.1276$                                 |
| Final R indexes [all data]                       | $R_1 = 0.0606$ , $wR_2 = 0.1415$                                 |
| Largest diff. peak/hole / $e \text{ \AA}^{-3}$   | 0.32/-0.17                                                       |

## 7. References

- a) D. Q. Liang, D. D. Ge, Y. P. Lv, W. Z. Huang, B. L. Wang and W. L. Li, *J Org Chem.*, 2018, **83**, 4681-4691; b) D. Q. Liang, Q. S. Dong, P. H. Xu, Y. Dong, W. L. Li and Y. Ma, *J Org Chem.*, 2018, **83**, 11978-11986; c) Y. N. Li, Y. Chang, Y. F. Li, C. Cao, J. S. Yang, B. L. Wang and D. Q. Liang, *Adv. Synth. Catal.*, 2018, **360**, 2488-2492.

## 8. $^1\text{H}$ NMR, $^{13}\text{C}$ NMR and $^{19}\text{F}$ NMR spectra of the products

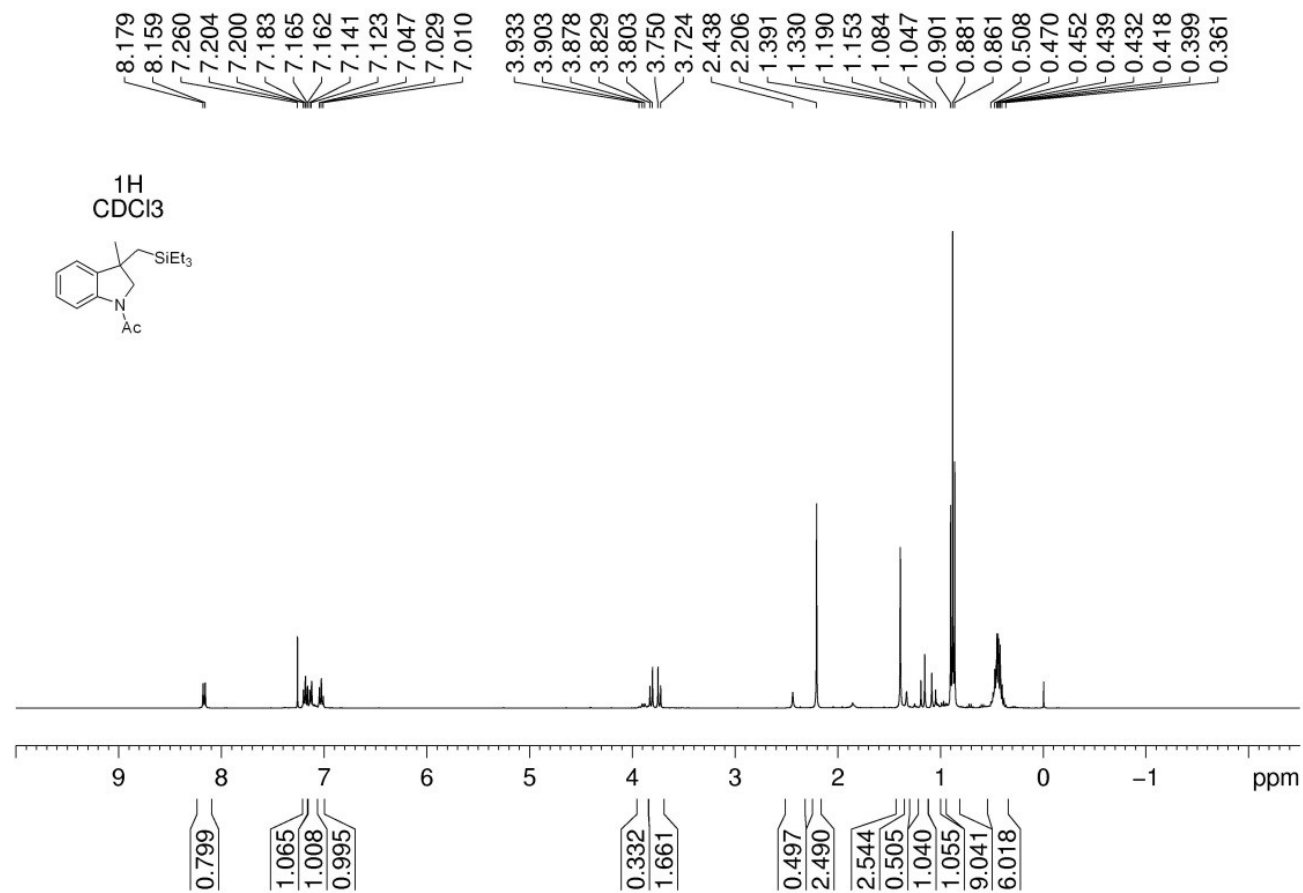

Figure S6. <sup>1</sup>H NMR (400 MHz, CDCl<sub>3</sub>) of compound 3aa

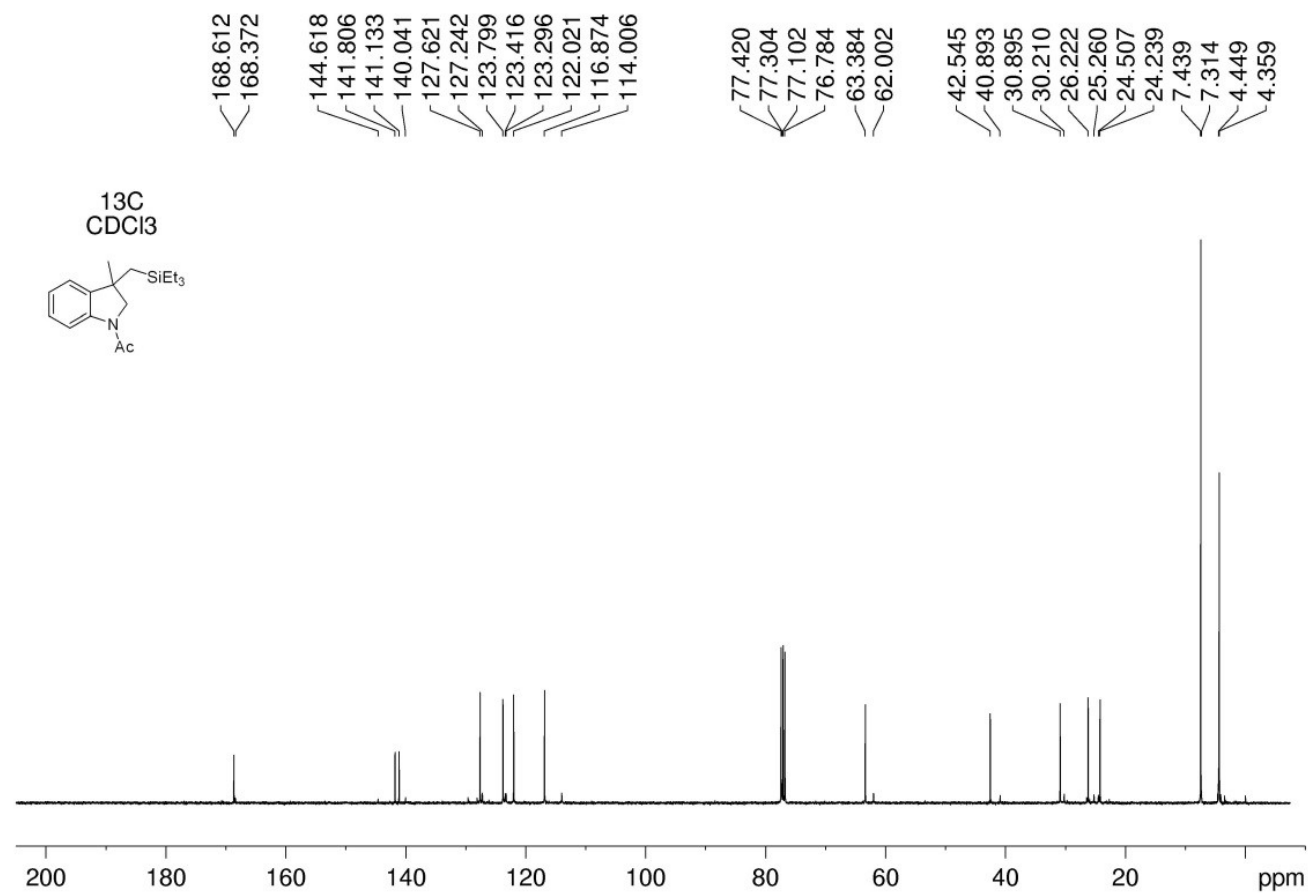

Figure S7. <sup>13</sup>C NMR (100 MHz, CDCl<sub>3</sub>) of compound 3aa

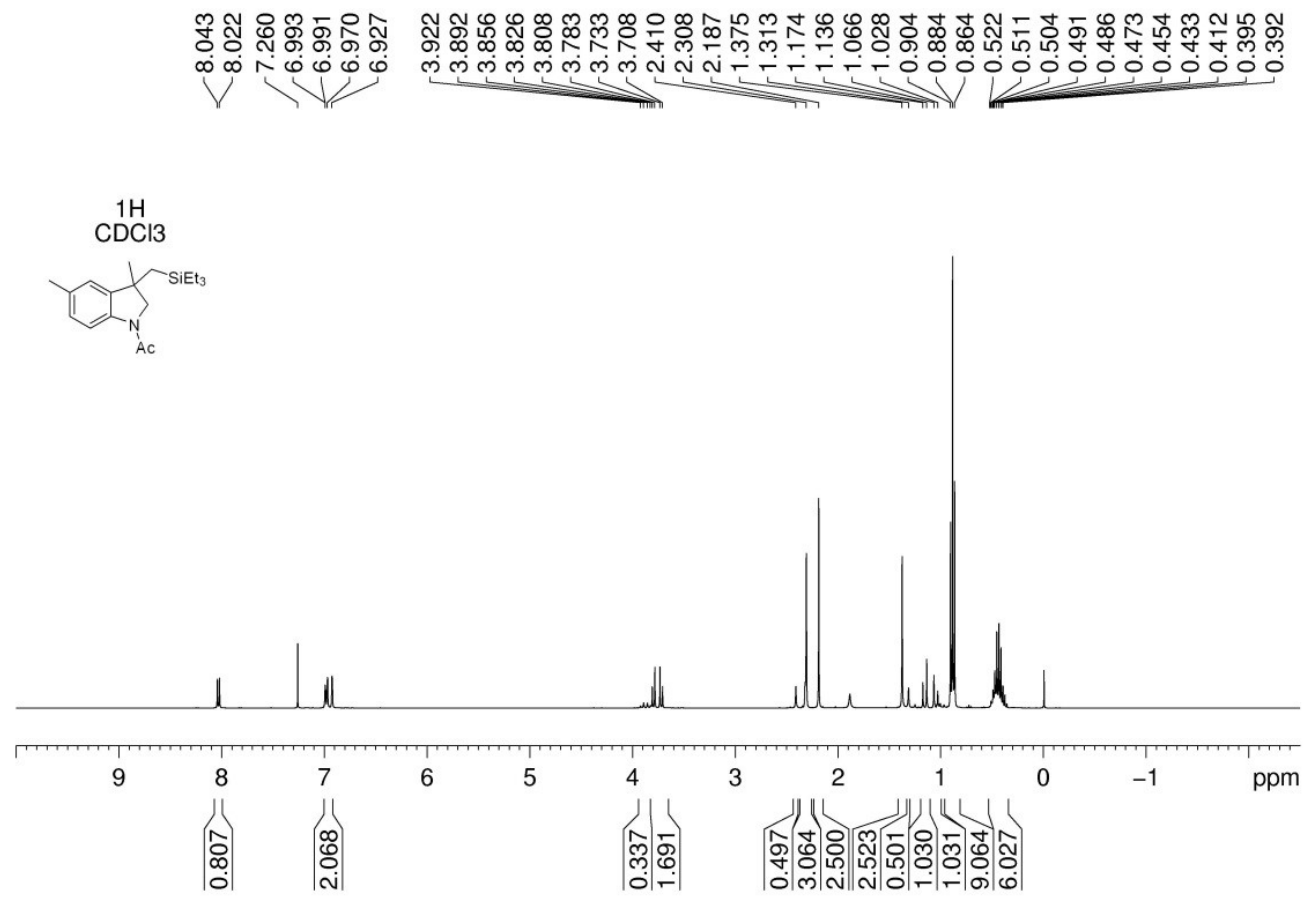

Figure S8. <sup>1</sup>H NMR (400 MHz, CDCl<sub>3</sub>) of compound 3ba



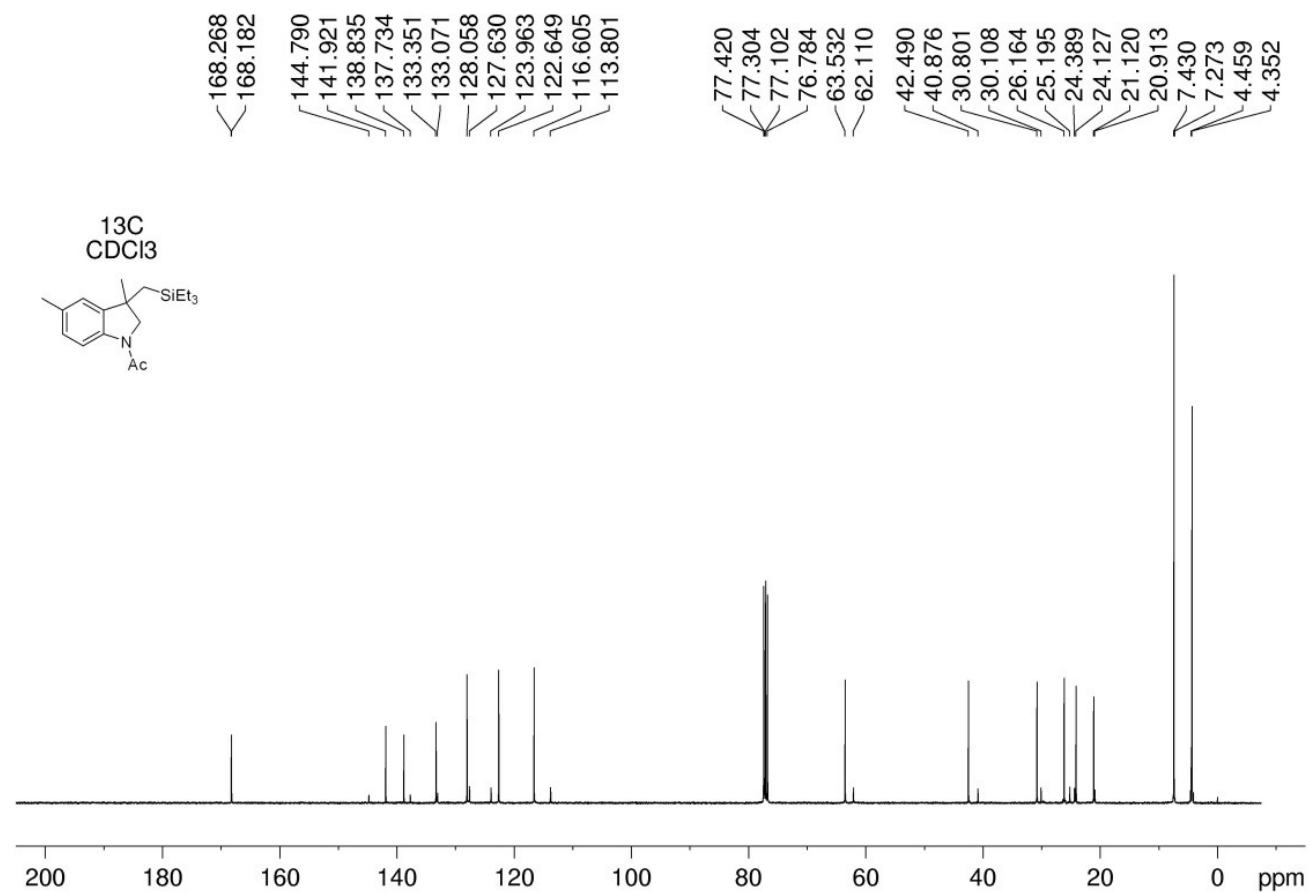

Figure S9. <sup>13</sup>C NMR (100 MHz, CDCl<sub>3</sub>) of compound 3ba

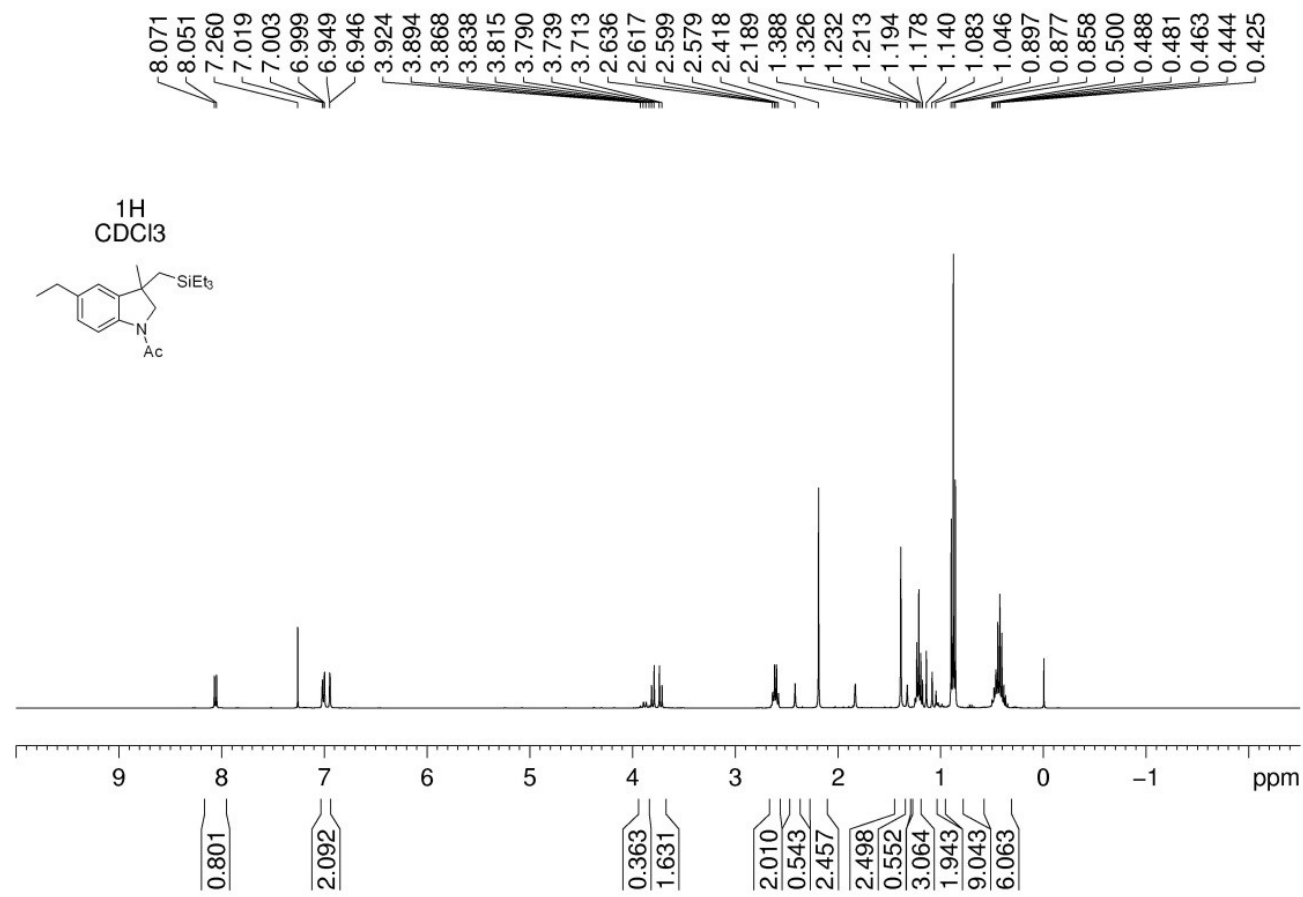

Figure S10. <sup>1</sup>H NMR (400 MHz, CDCl<sub>3</sub>) of compound 3ca

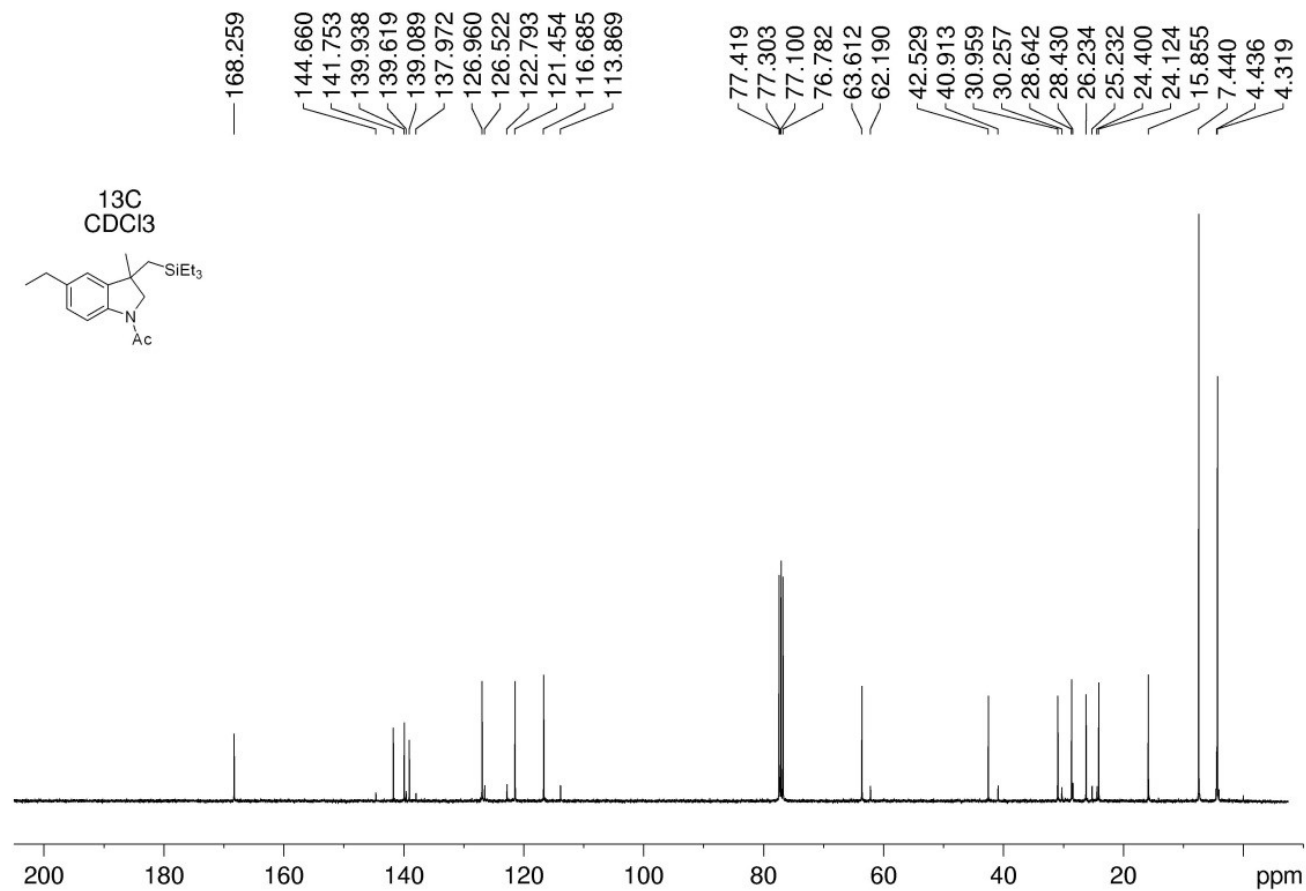

Figure S11. <sup>13</sup>C NMR (100 MHz, CDCl<sub>3</sub>) of compound 3ca

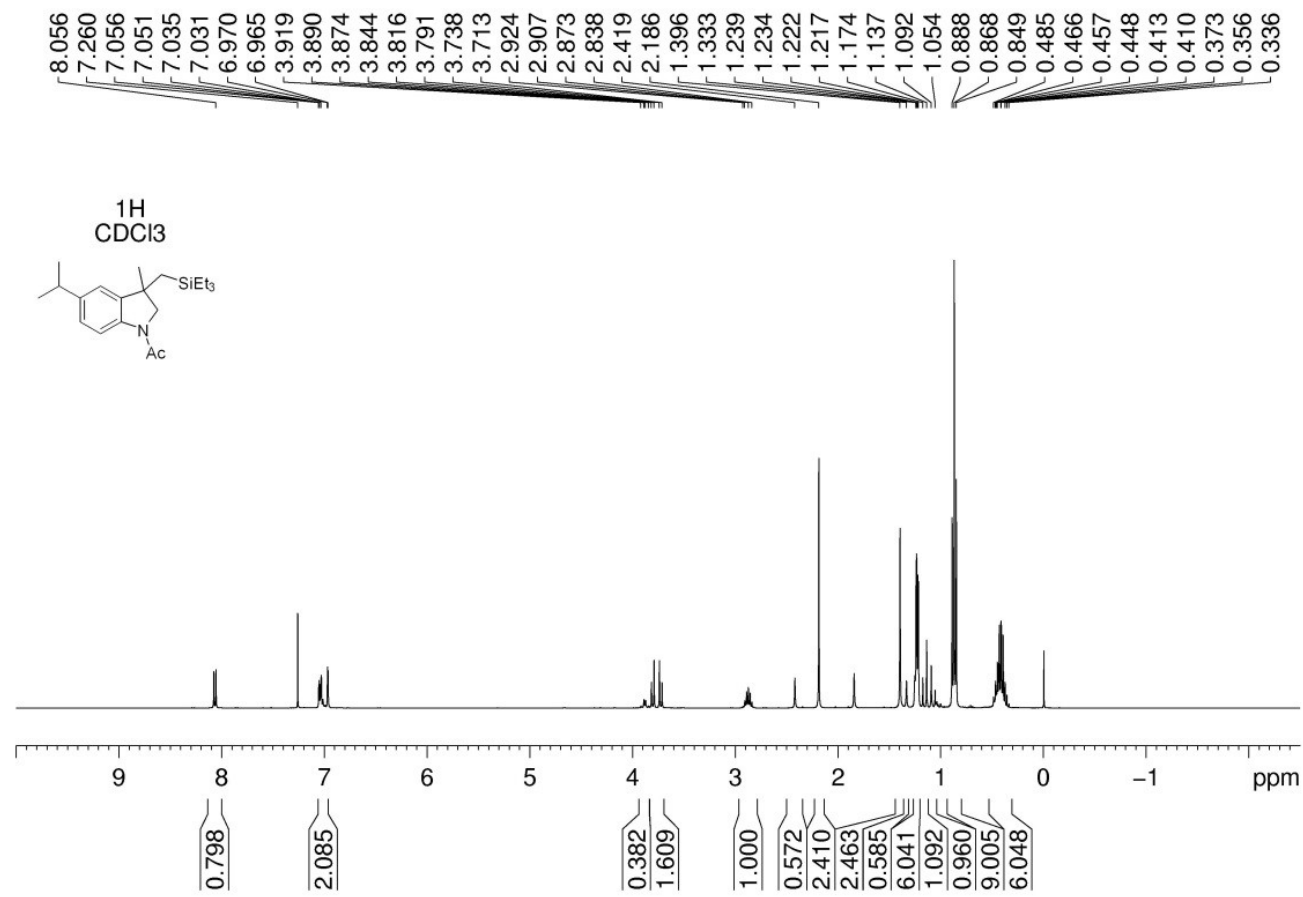

Figure S12. <sup>1</sup>H NMR (400 MHz, CDCl<sub>3</sub>) of compound 3da

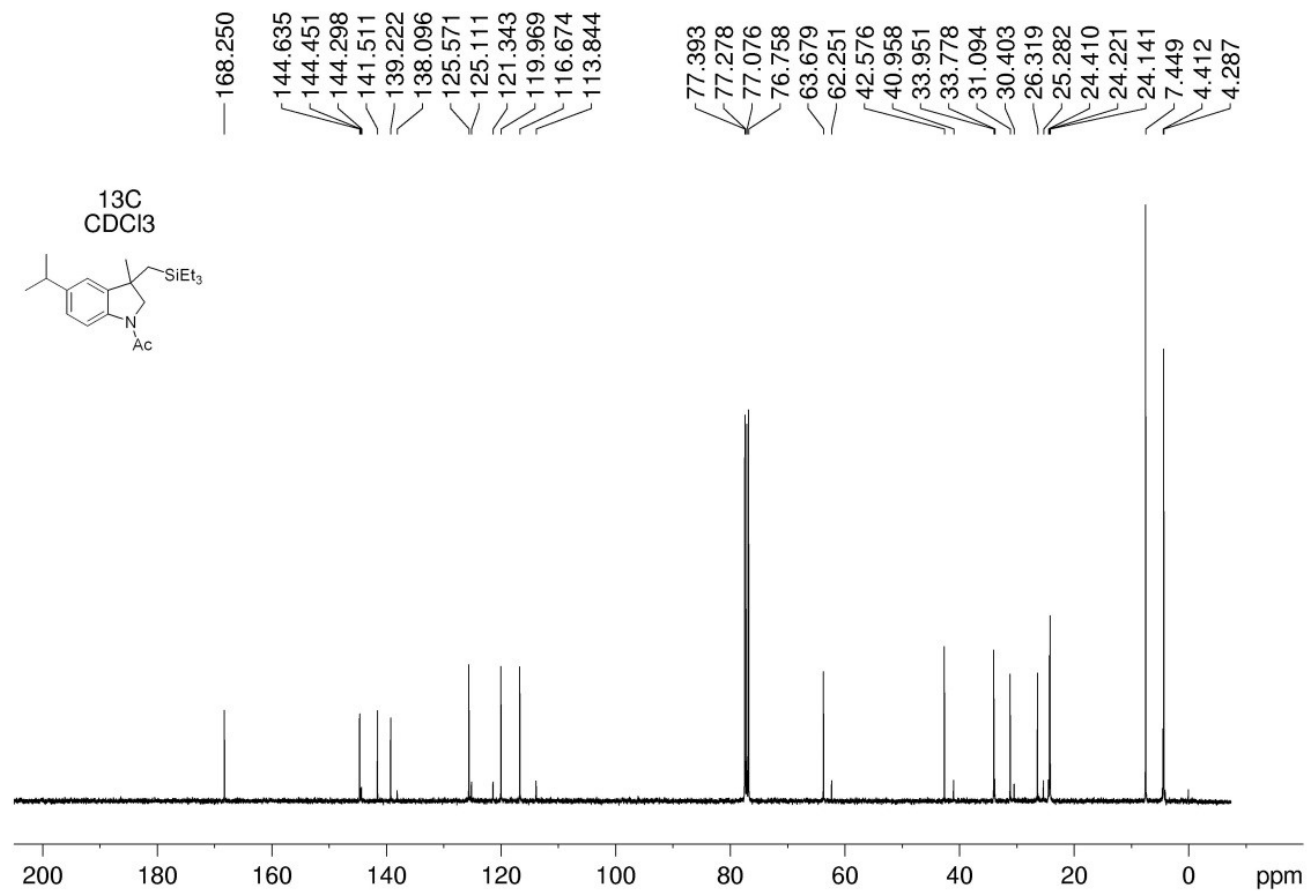

Figure S13. <sup>13</sup>C NMR (100 MHz, CDCl<sub>3</sub>) of compound 3da

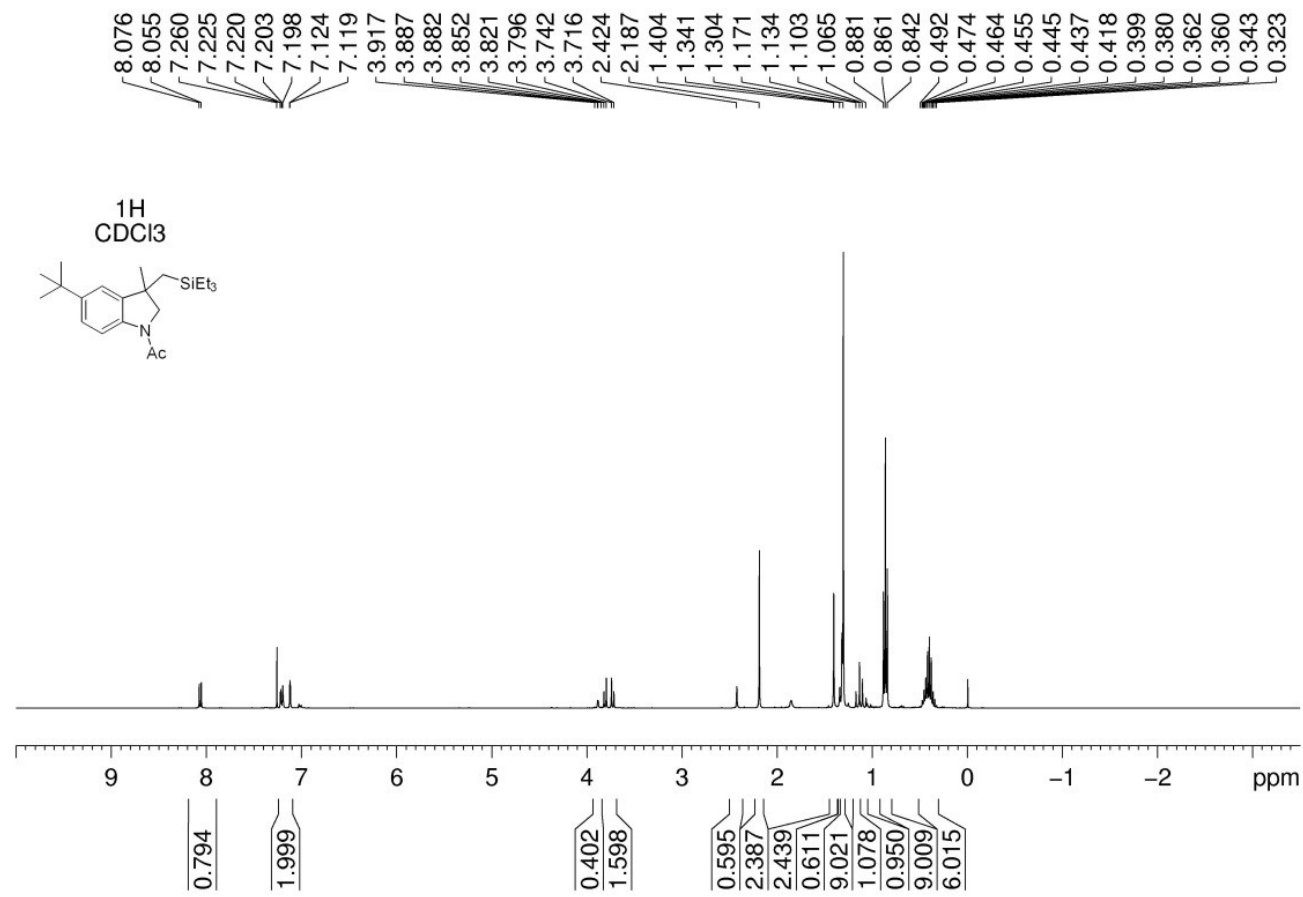

Figure S14. <sup>1</sup>H NMR (400 MHz, CDCl<sub>3</sub>) of compound 3ea

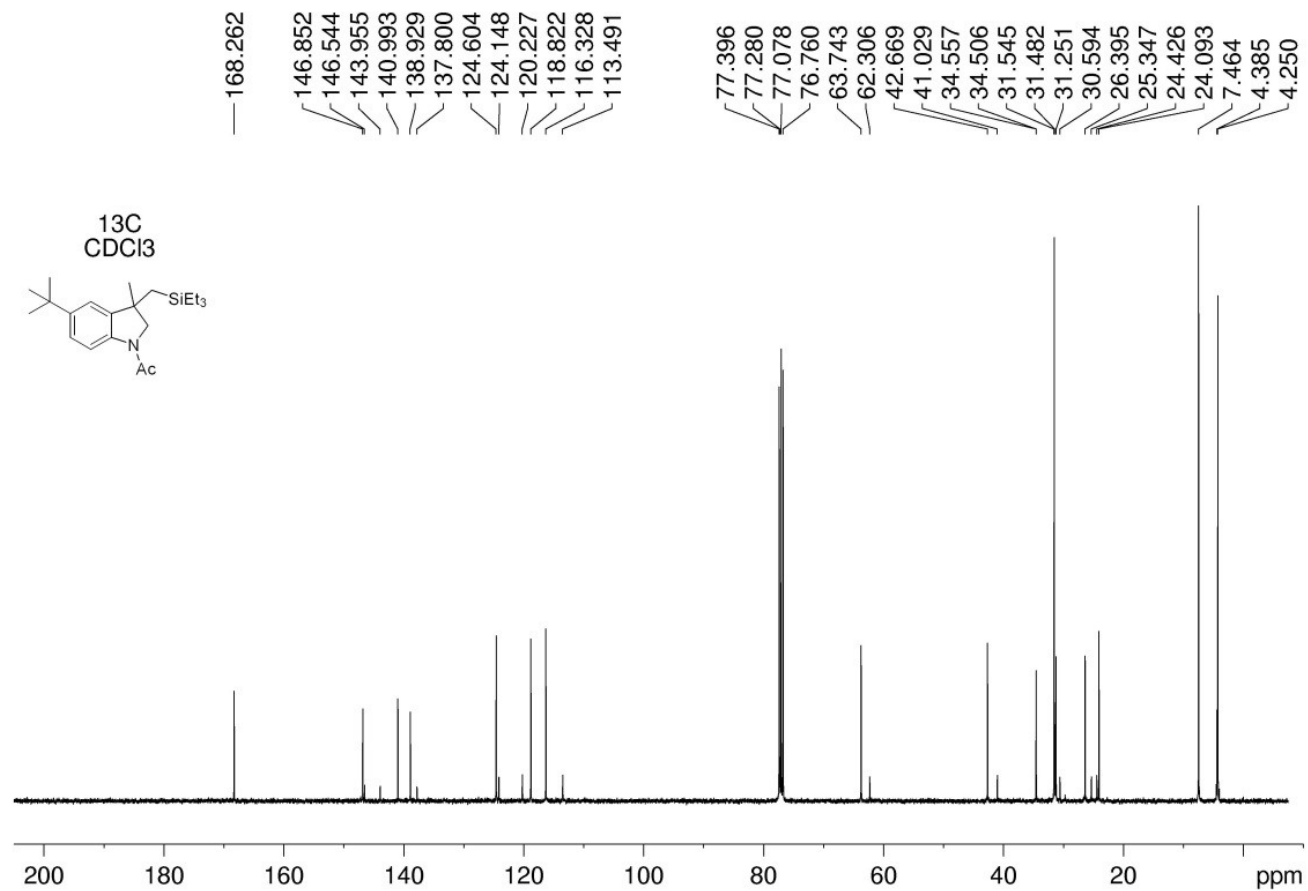

Figure S15. <sup>13</sup>C NMR (100 MHz, CDCl<sub>3</sub>) of compound 3ea

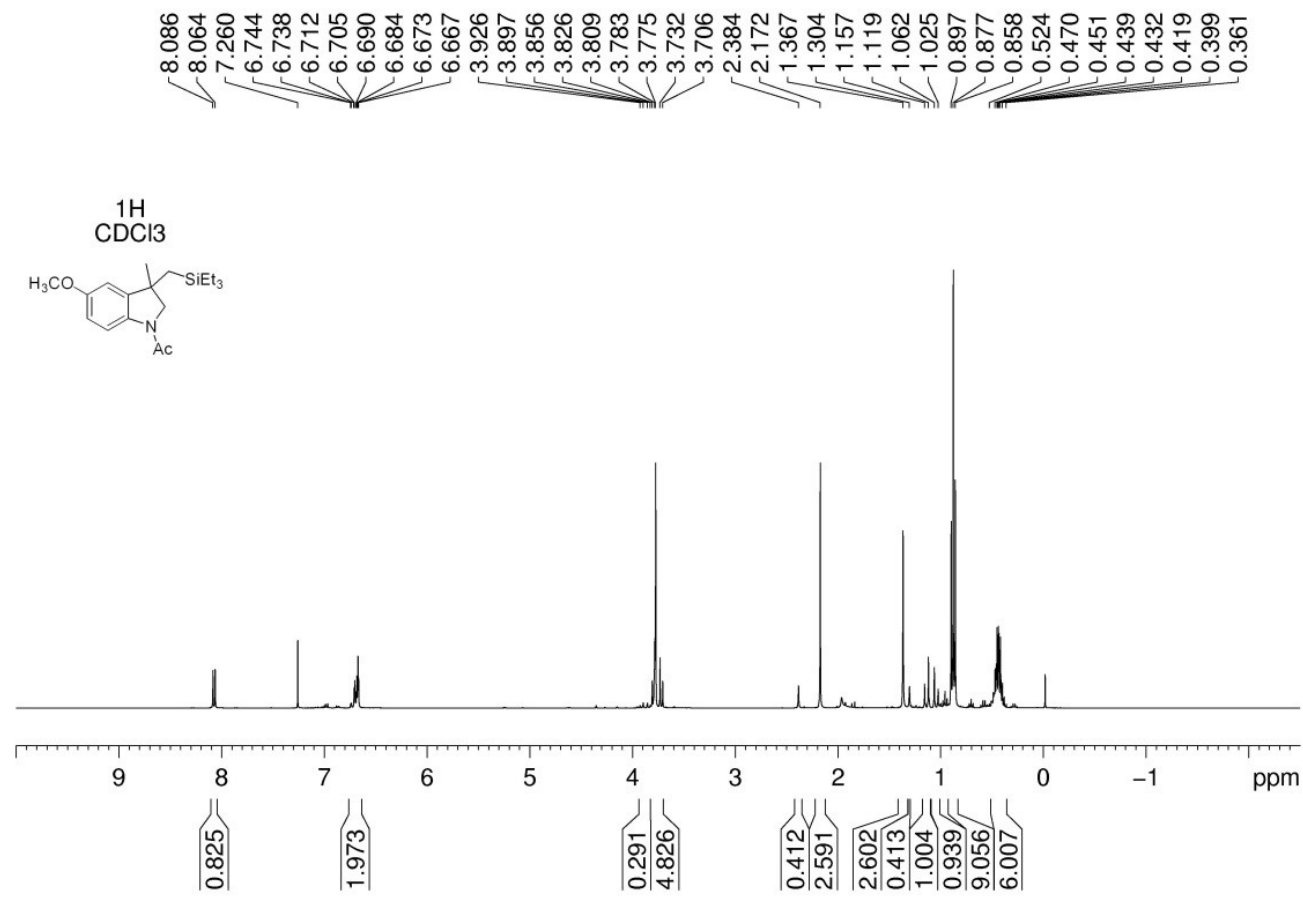

Figure S16. <sup>1</sup>H NMR (400 MHz, CDCl<sub>3</sub>) of compound 3fa



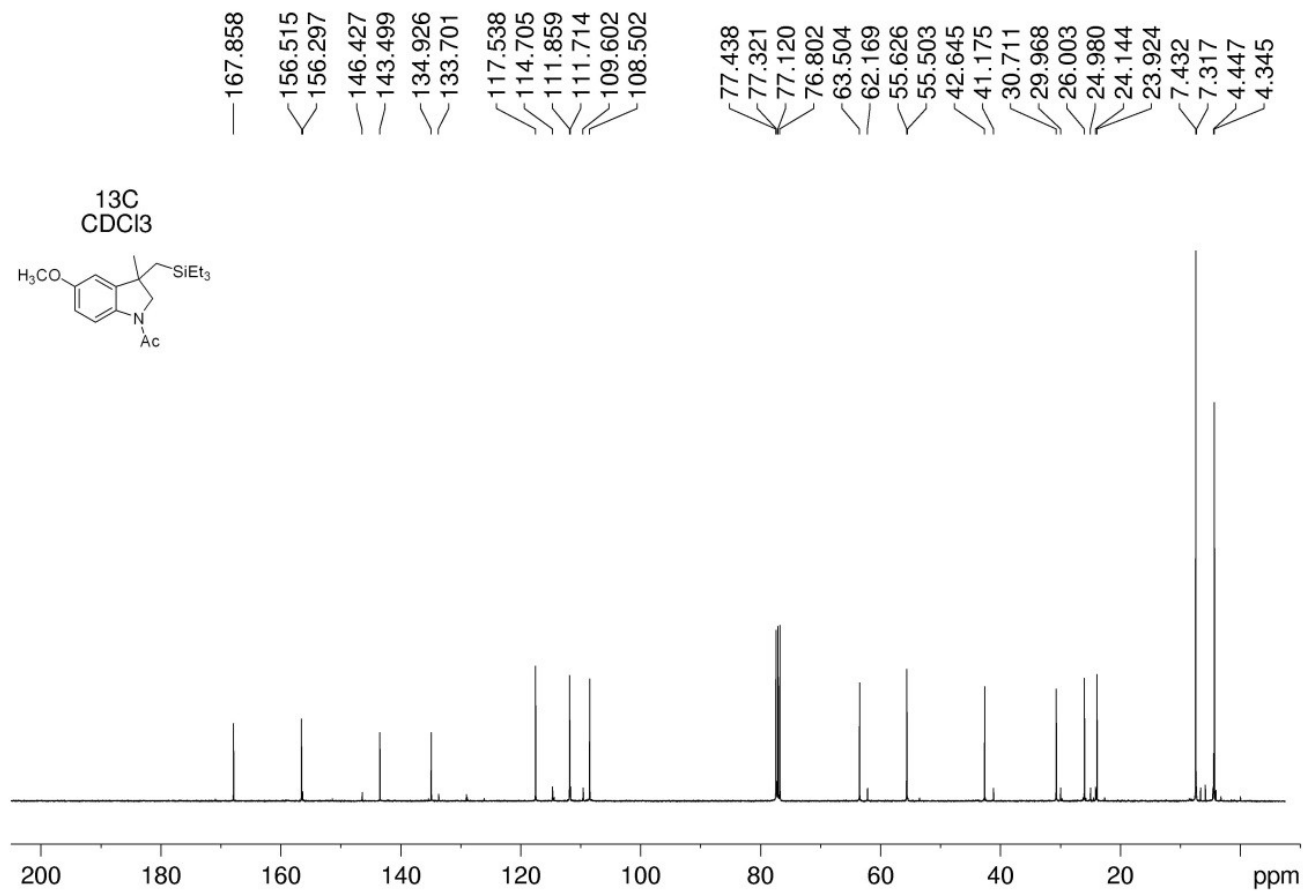

**Figure S17. <sup>13</sup>C NMR (100 MHz, CDCl<sub>3</sub>) of compound 3fa**

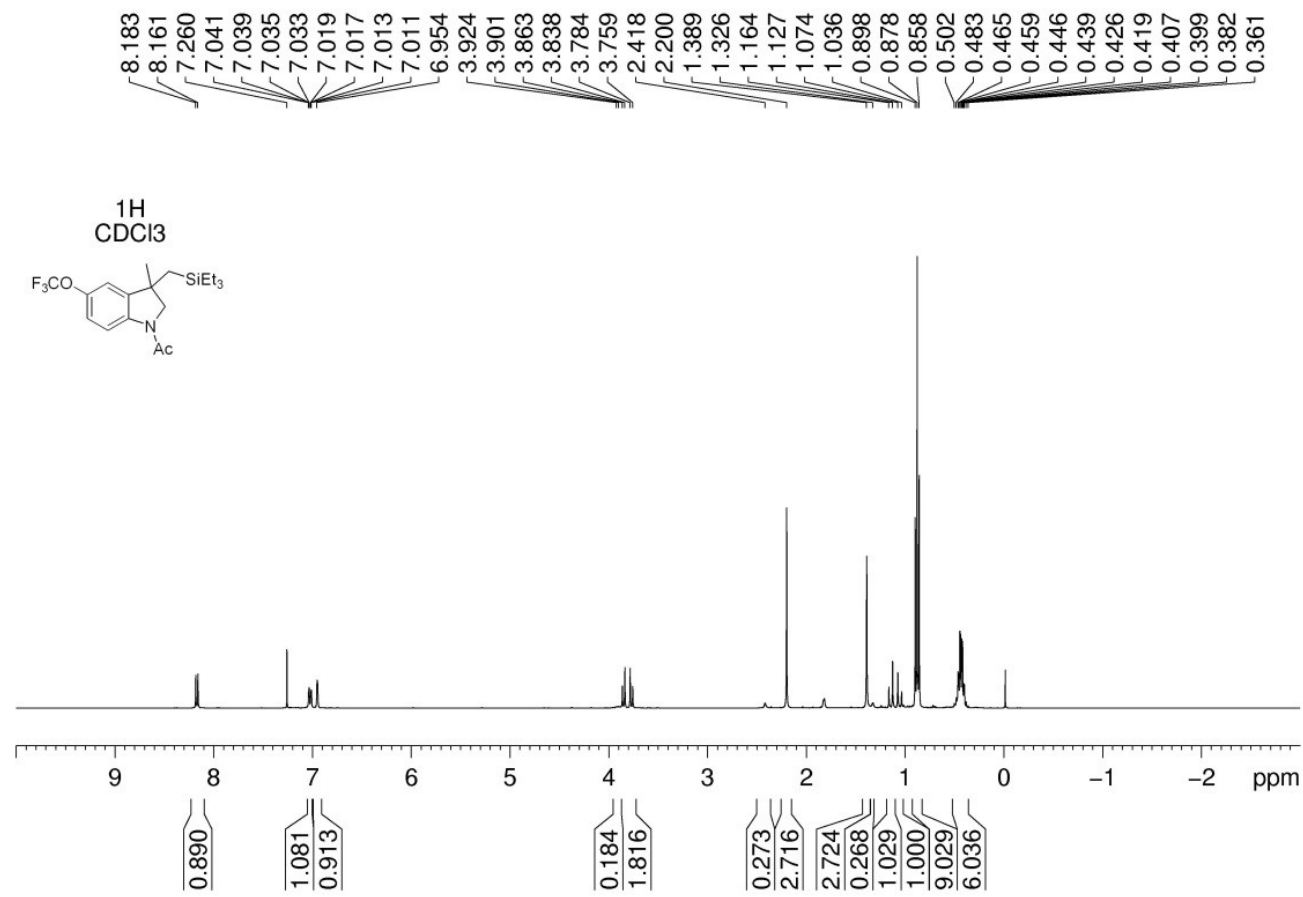

Figure S18. <sup>1</sup>H NMR (400 MHz, CDCl<sub>3</sub>) of compound 3ga

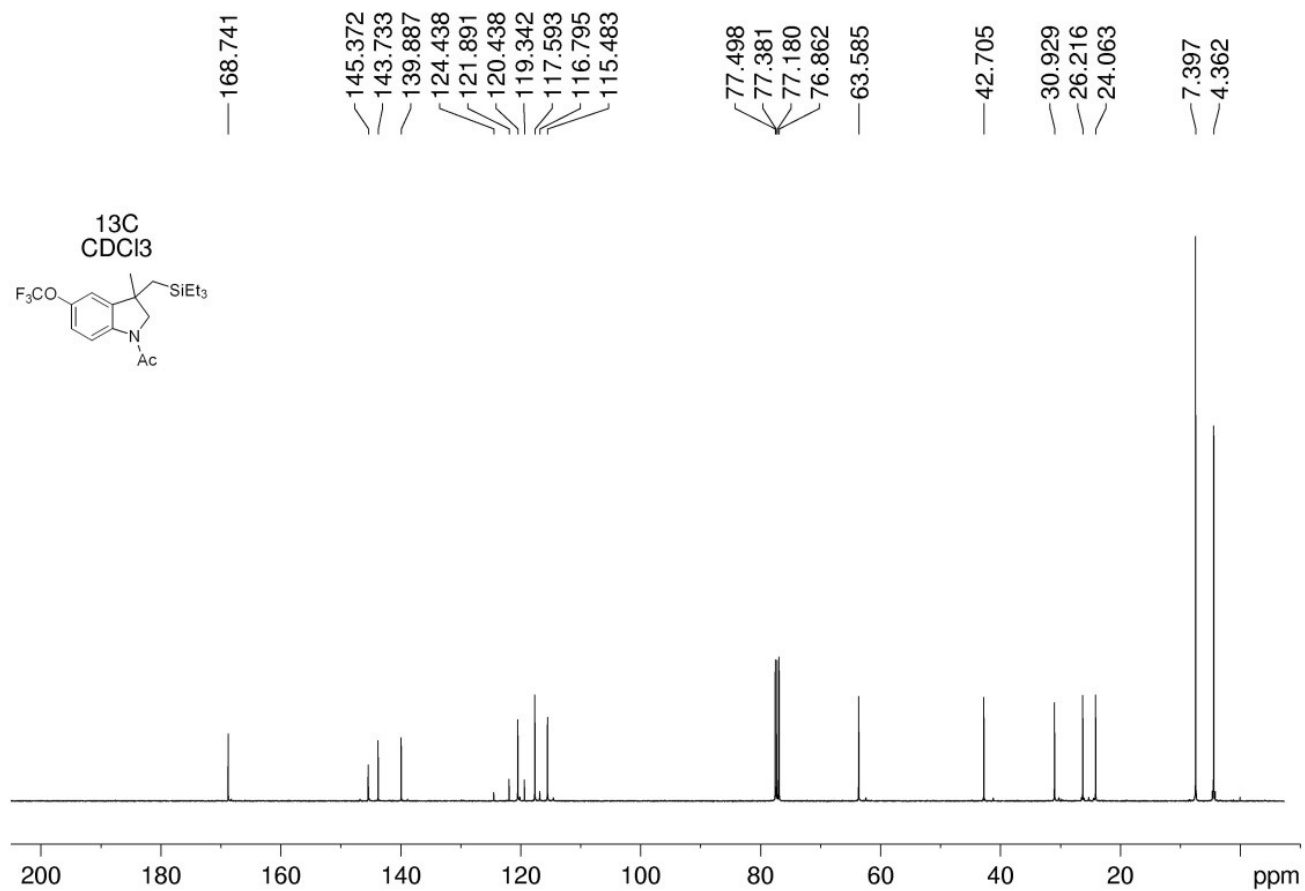

Figure S19. <sup>13</sup>C NMR (100 MHz, CDCl<sub>3</sub>) of compound 3ga

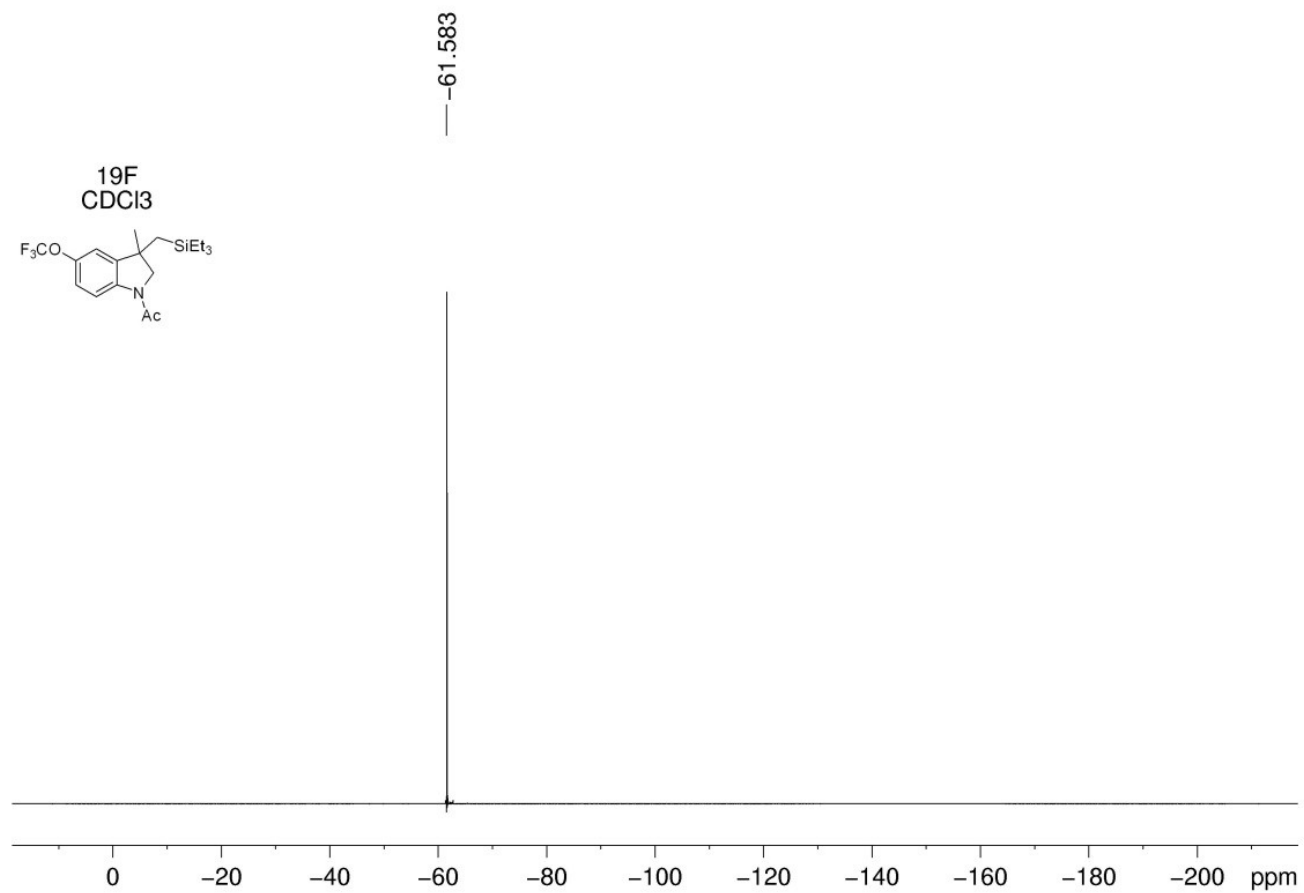

Figure S20.  $^{19}\text{F}$  NMR (376 MHz,  $\text{CDCl}_3$ ) of compound 3ga

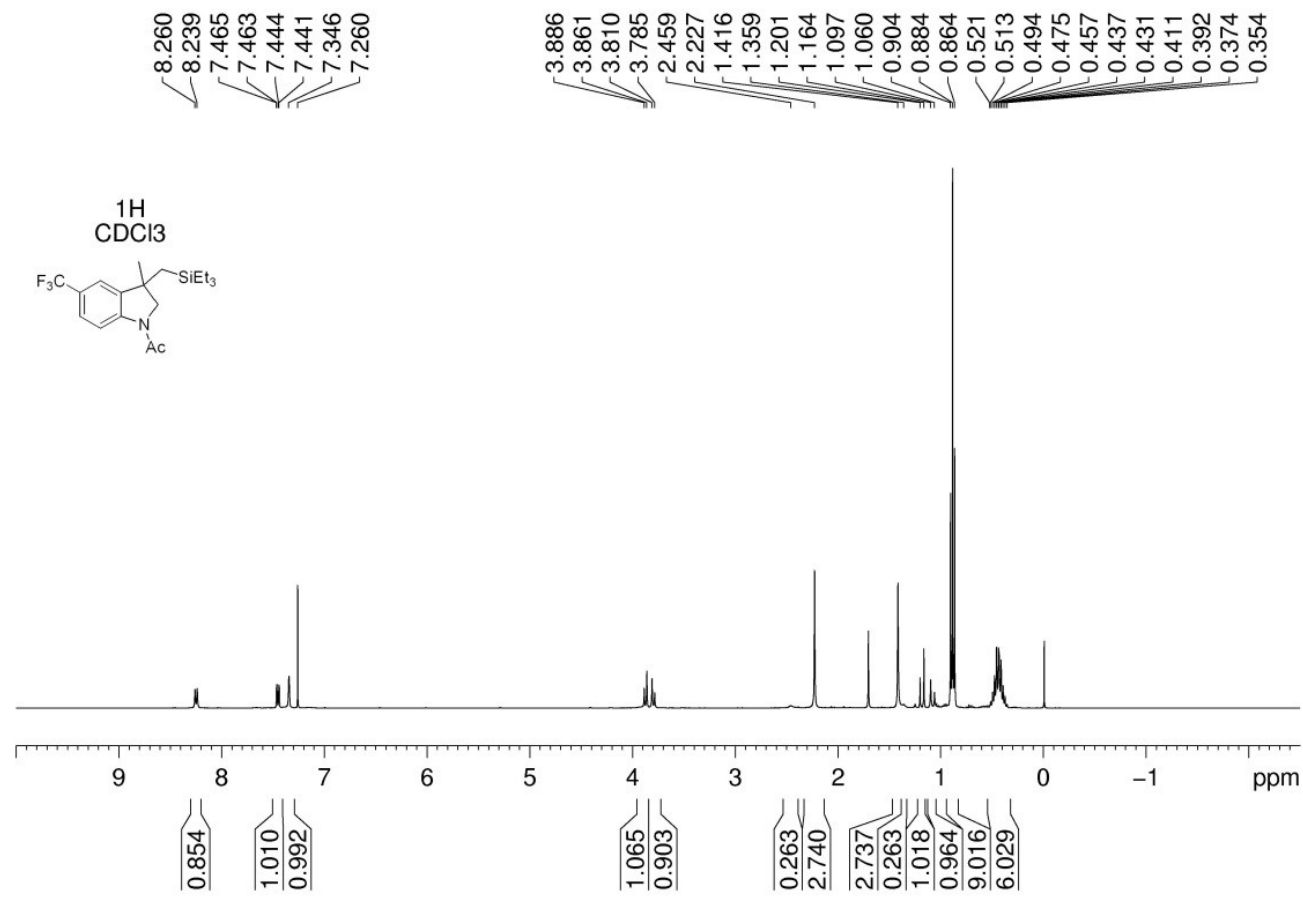

Figure S21. <sup>1</sup>H NMR (400 MHz, CDCl<sub>3</sub>) of compound 3ha

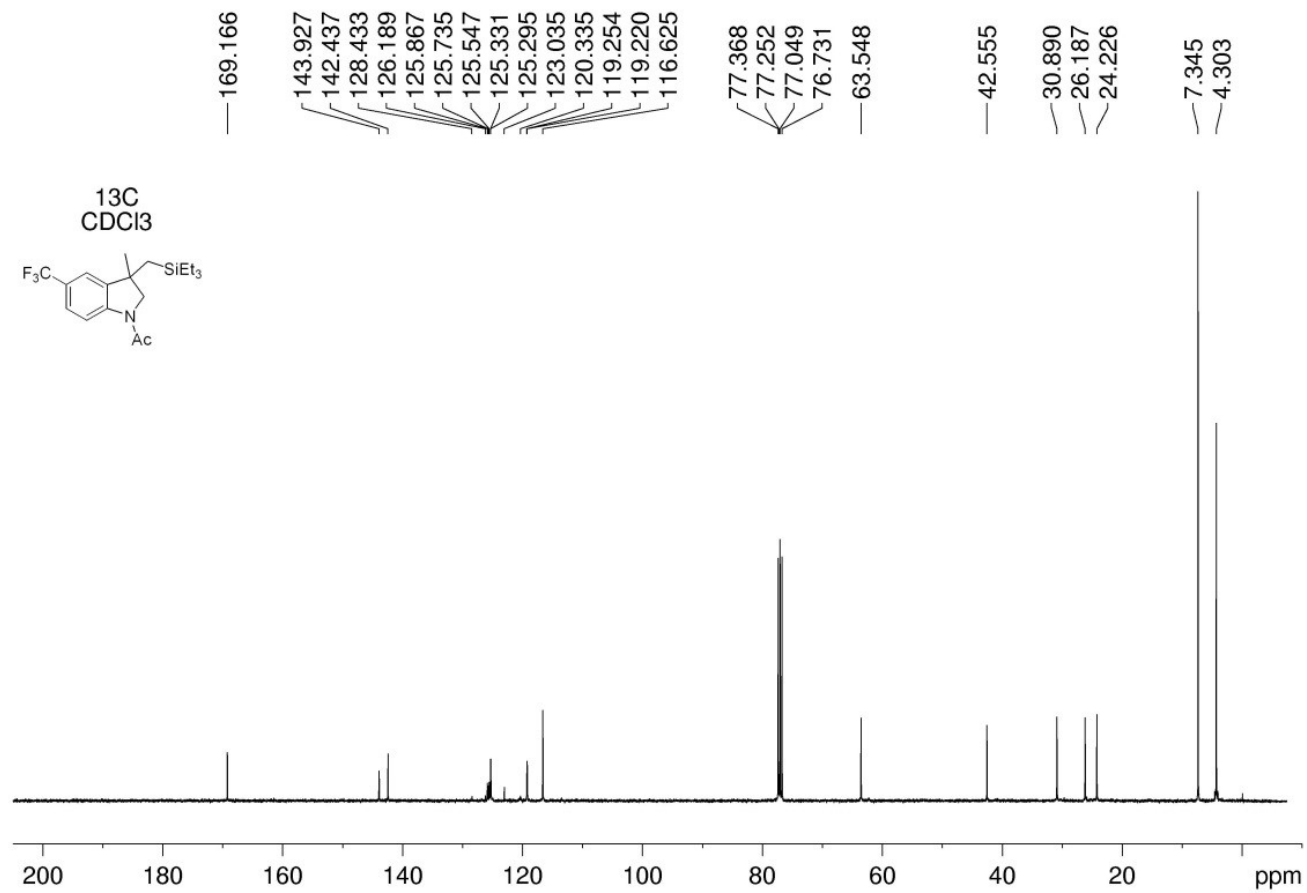

Figure S22. <sup>13</sup>C NMR (100 MHz, CDCl<sub>3</sub>) of compound 3ha

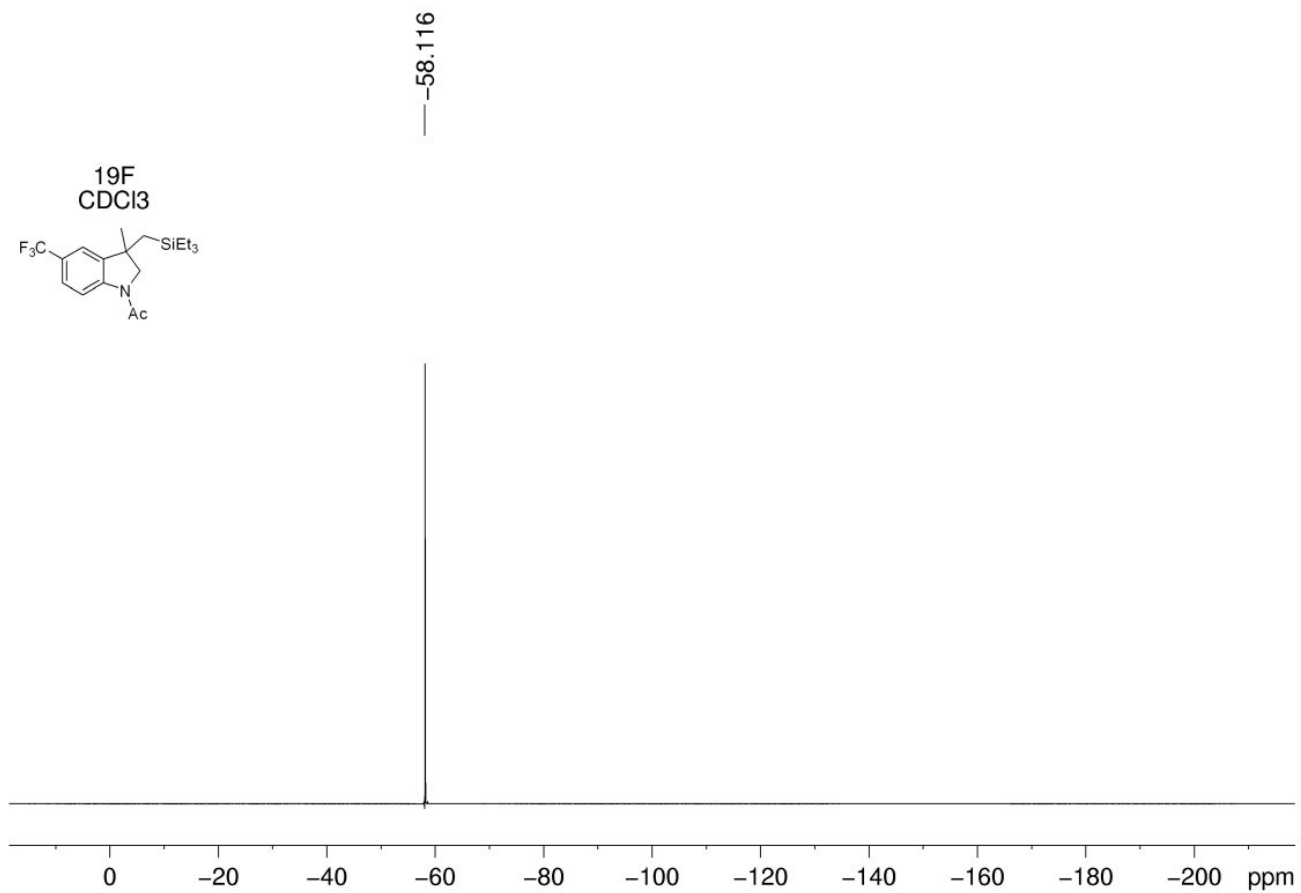

Figure S23.  $^{19}\text{F}$  NMR (376 MHz,  $\text{CDCl}_3$ ) of compound 3ha

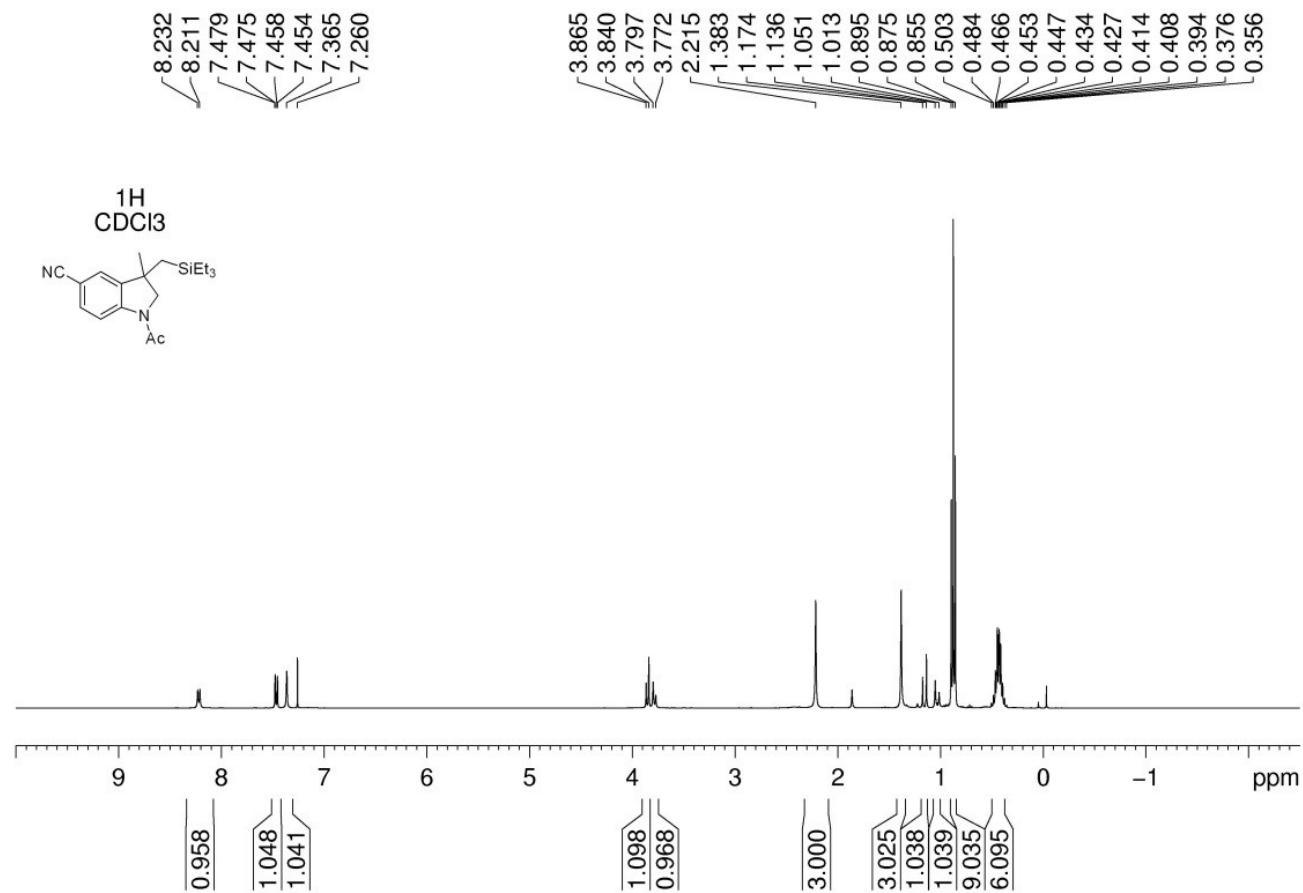

Figure S24. <sup>1</sup>H NMR (400 MHz, CDCl<sub>3</sub>) of compound 3ia



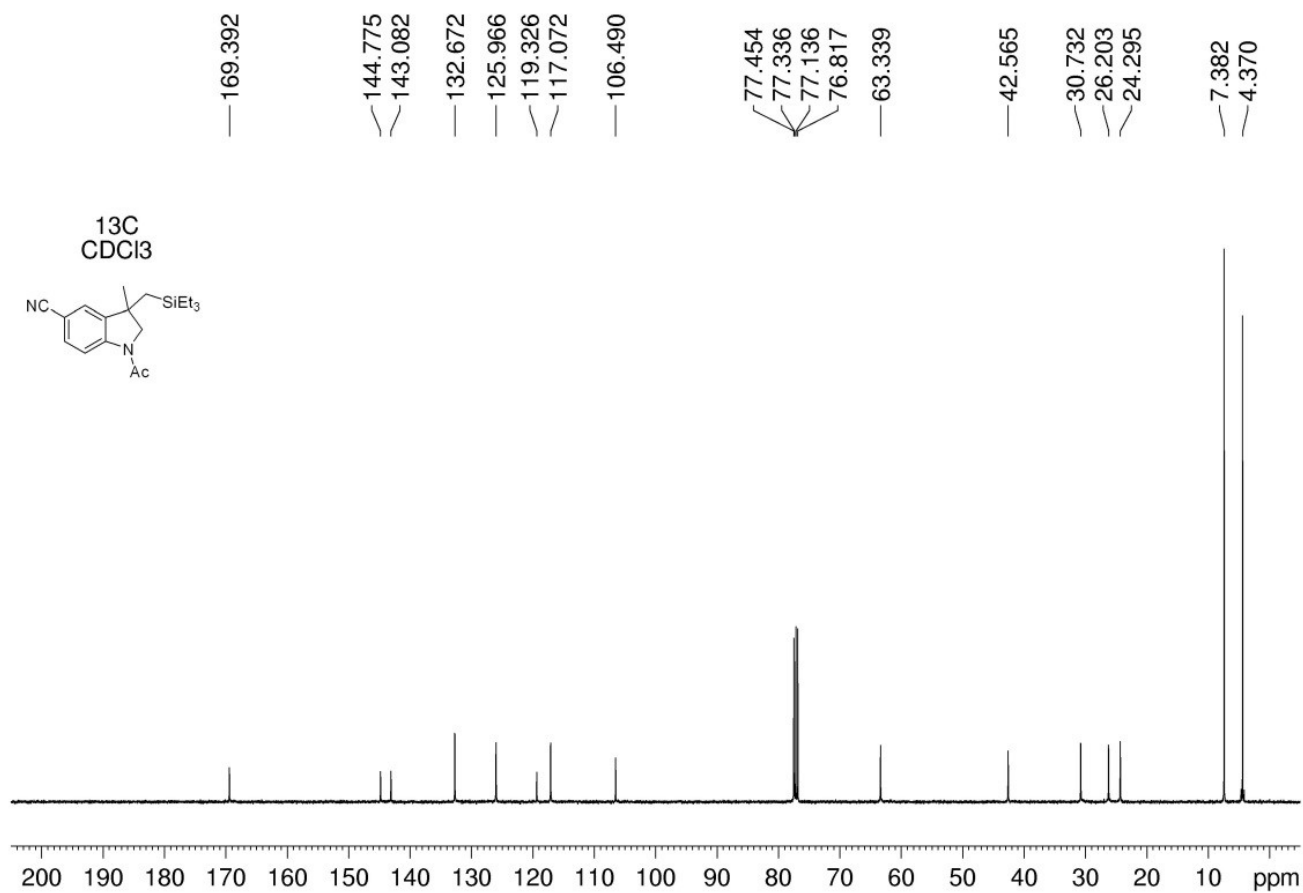

Figure S25. <sup>13</sup>C NMR (100 MHz, CDCl<sub>3</sub>) of compound 3ia

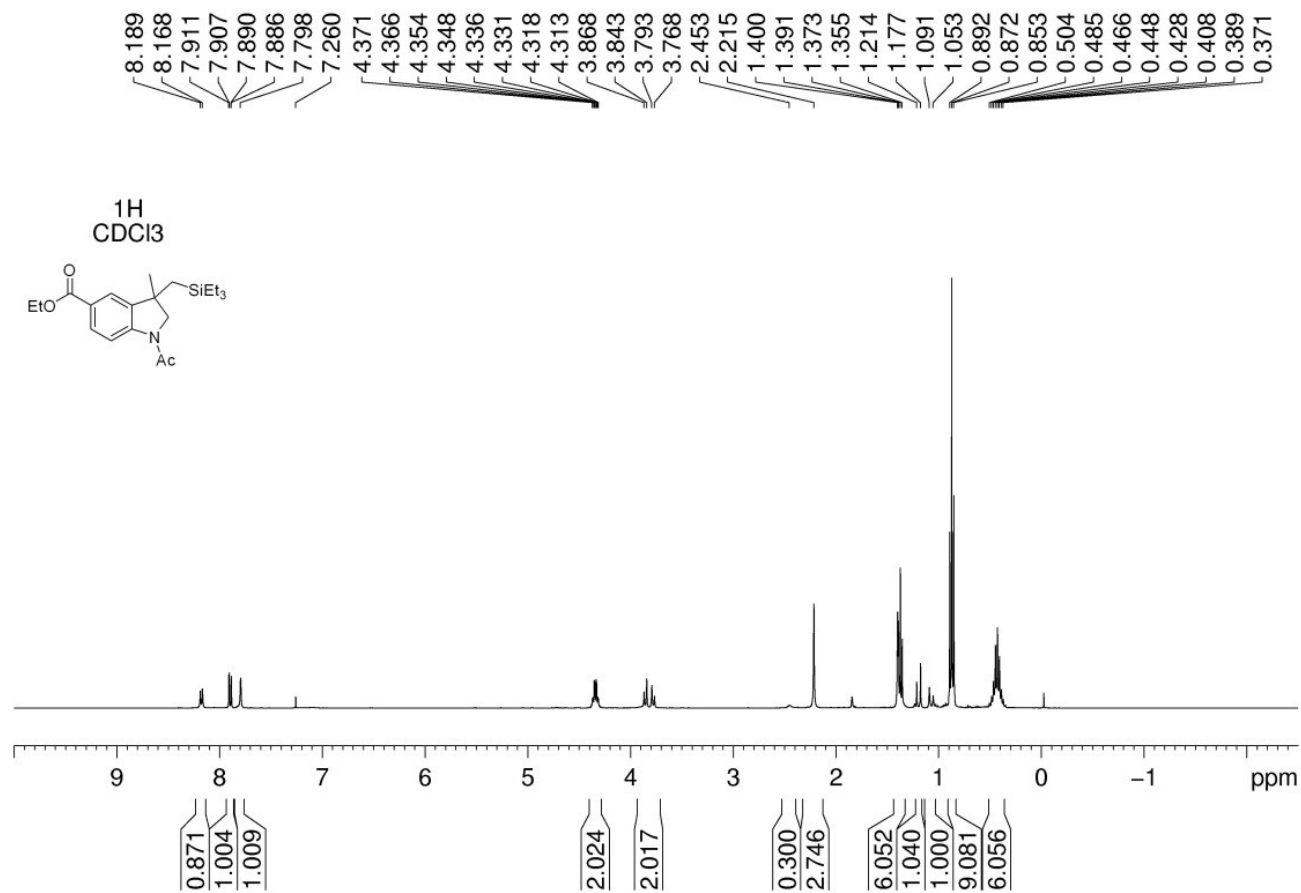

Figure S26. <sup>1</sup>H NMR (400 MHz, CDCl<sub>3</sub>) of compound 3ja

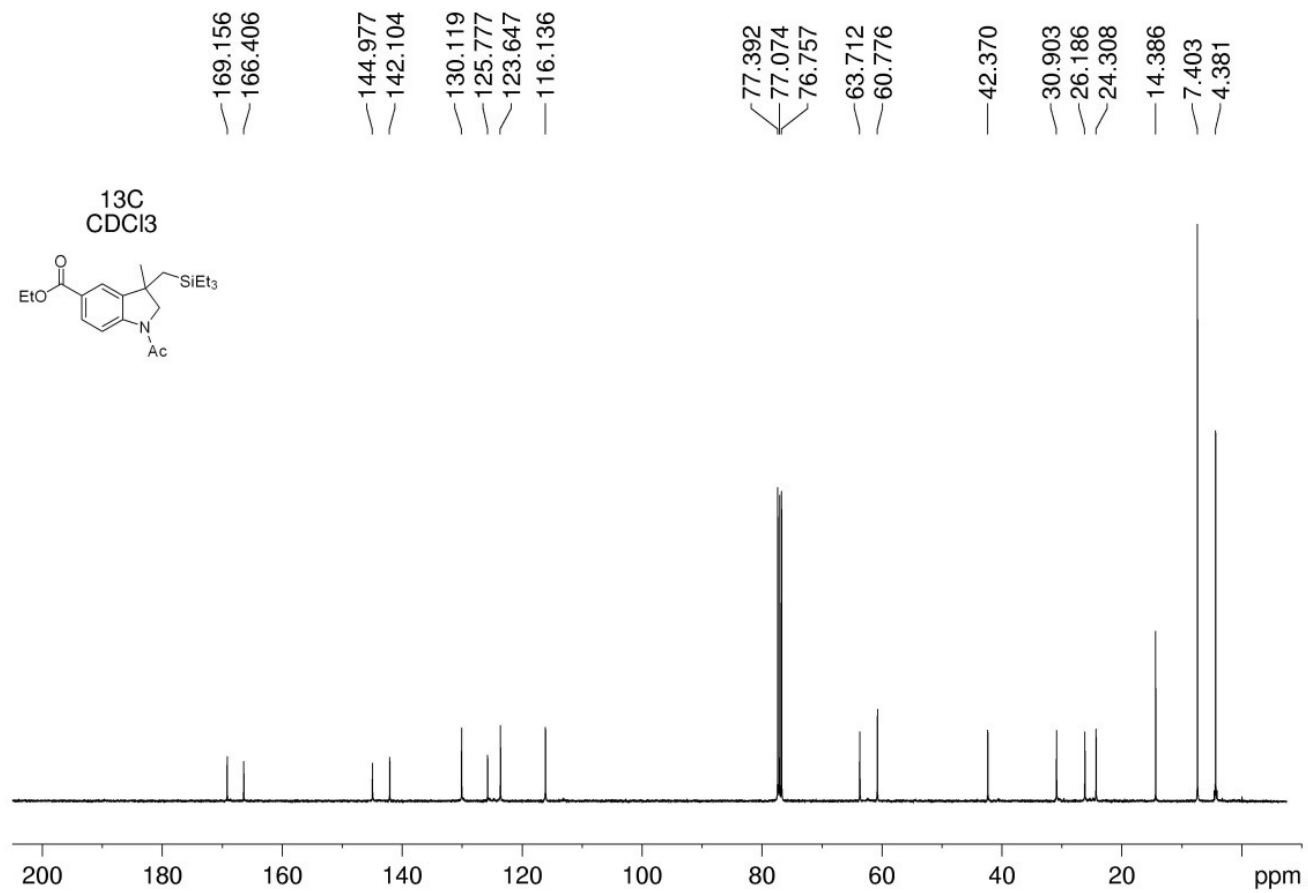

Figure S27. <sup>13</sup>C NMR (100 MHz, CDCl<sub>3</sub>) of compound 3ja

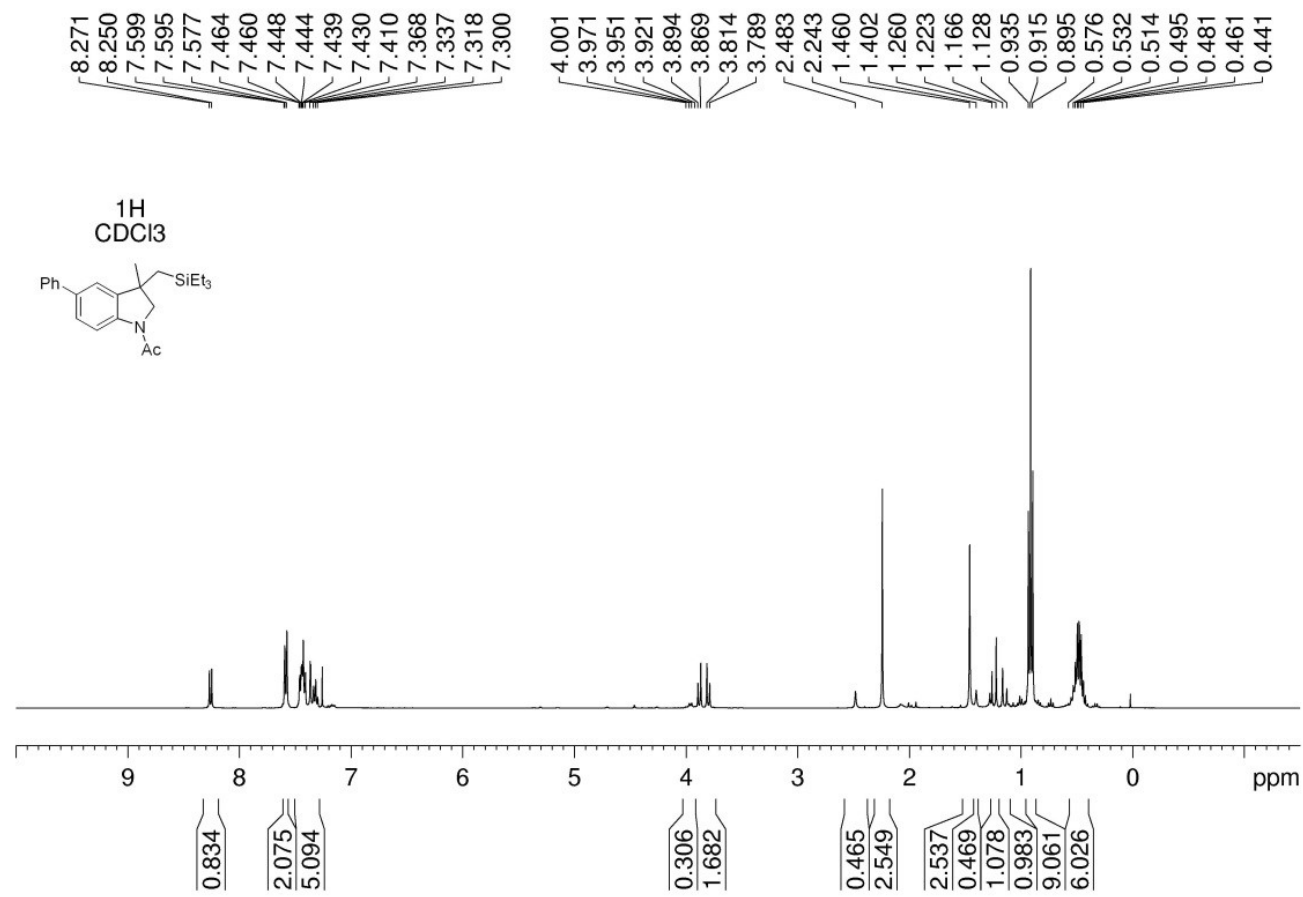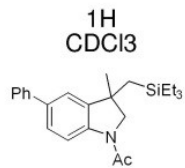

**Figure S28. <sup>1</sup>H NMR (400 MHz, CDCl<sub>3</sub>) of compound 3la**

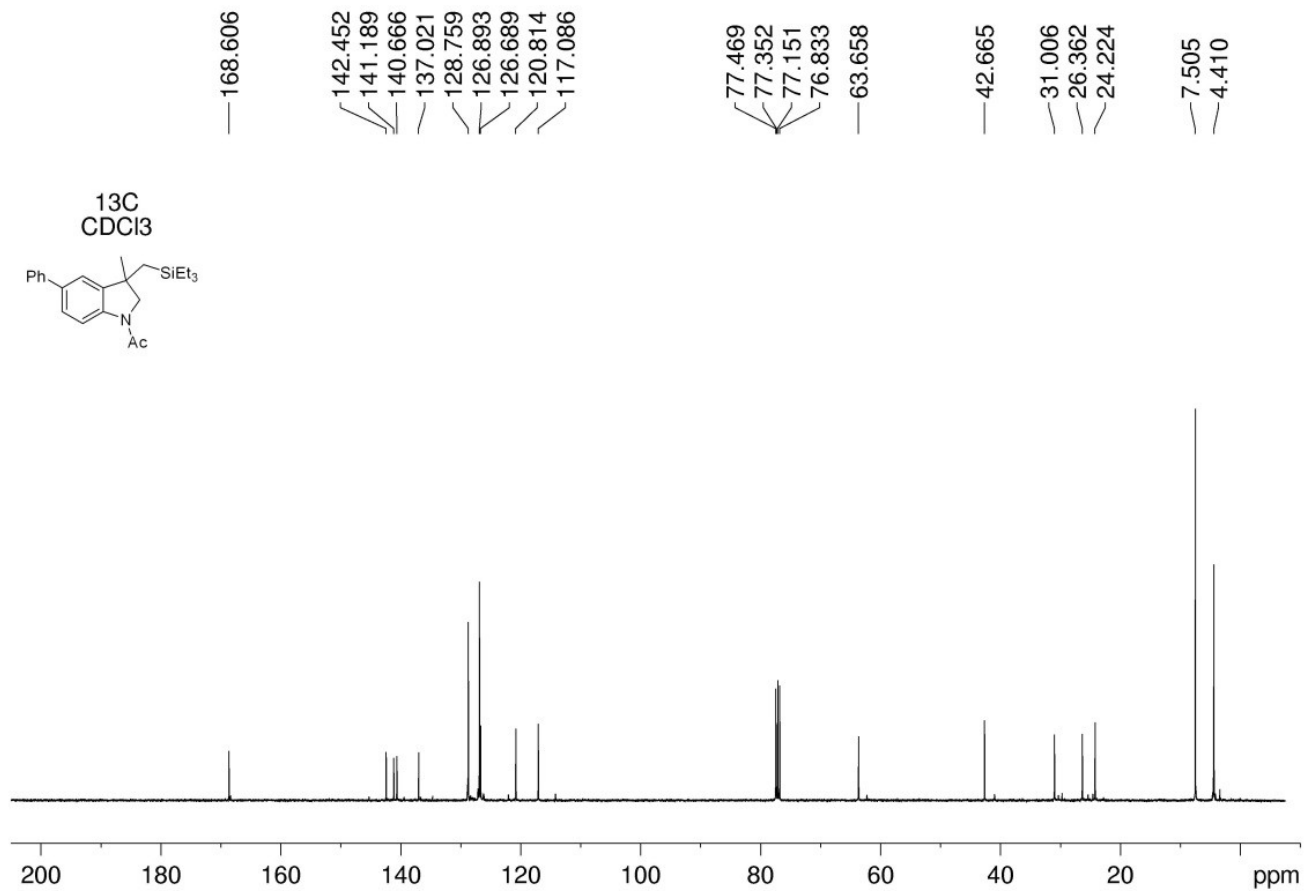

Figure S29. <sup>13</sup>C NMR (100 MHz, CDCl<sub>3</sub>) of compound 3la

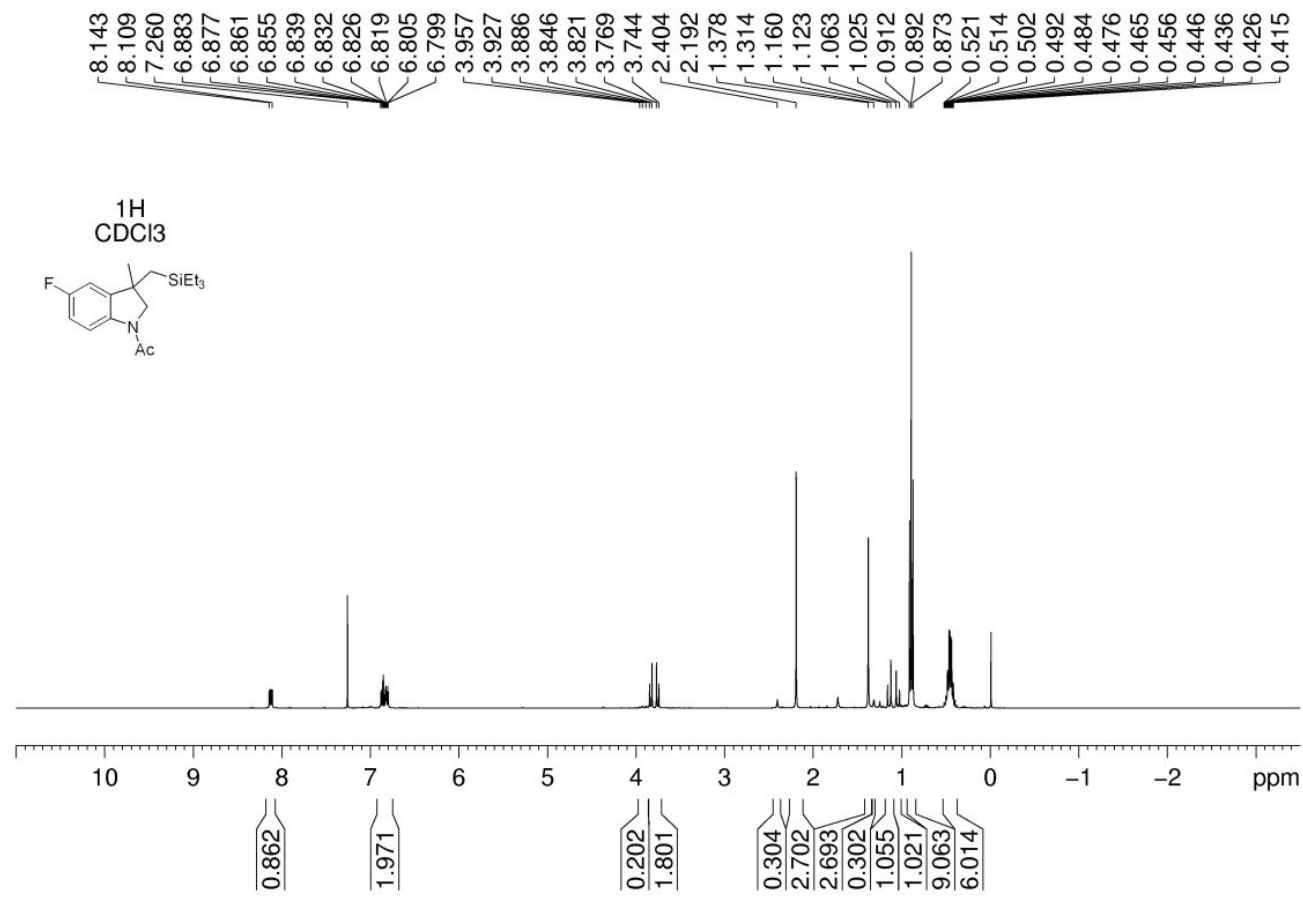

Figure S30. <sup>1</sup>H NMR (400 MHz, CDCl<sub>3</sub>) of compound 3ma

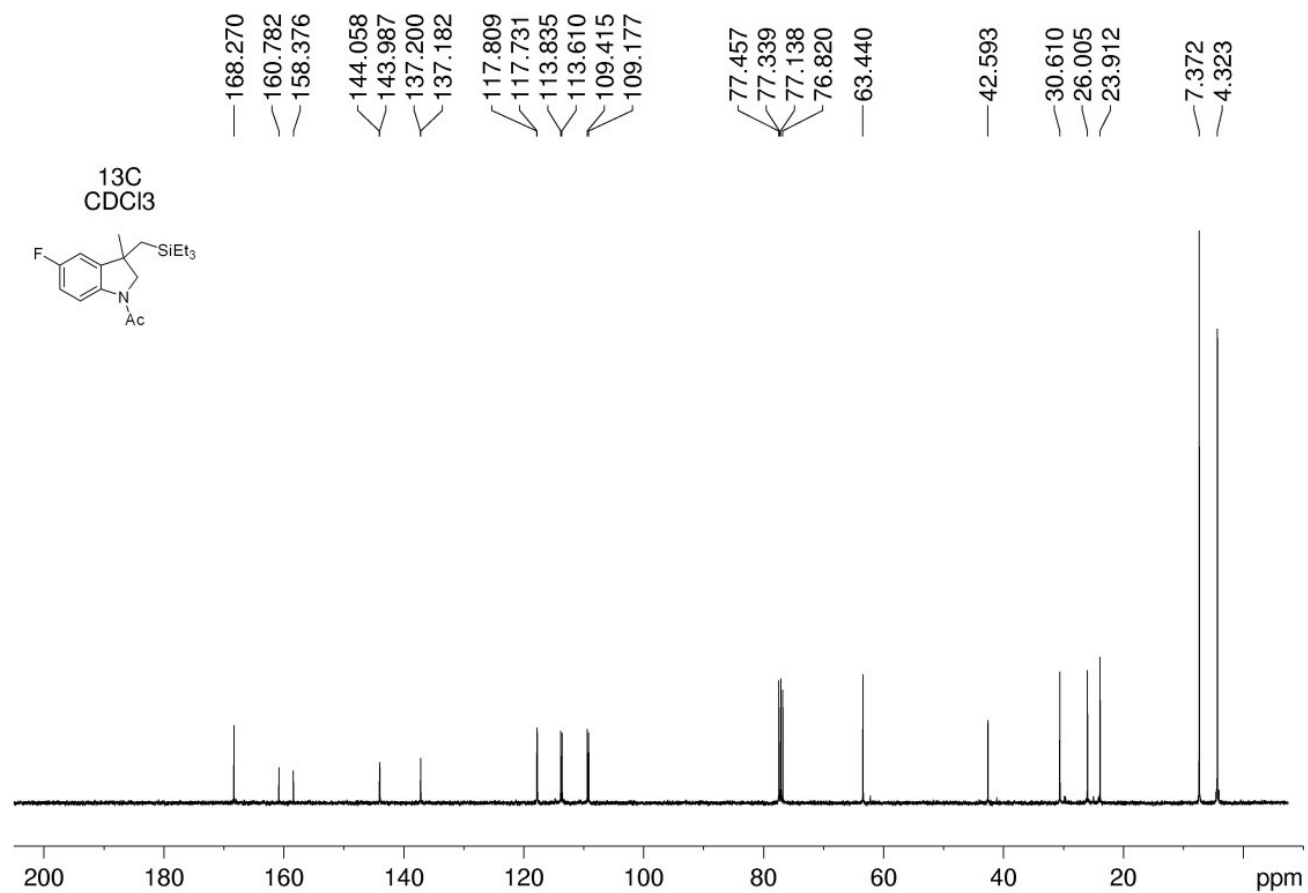

Figure S31. <sup>13</sup>C NMR (100 MHz, CDCl<sub>3</sub>) of compound 3ma

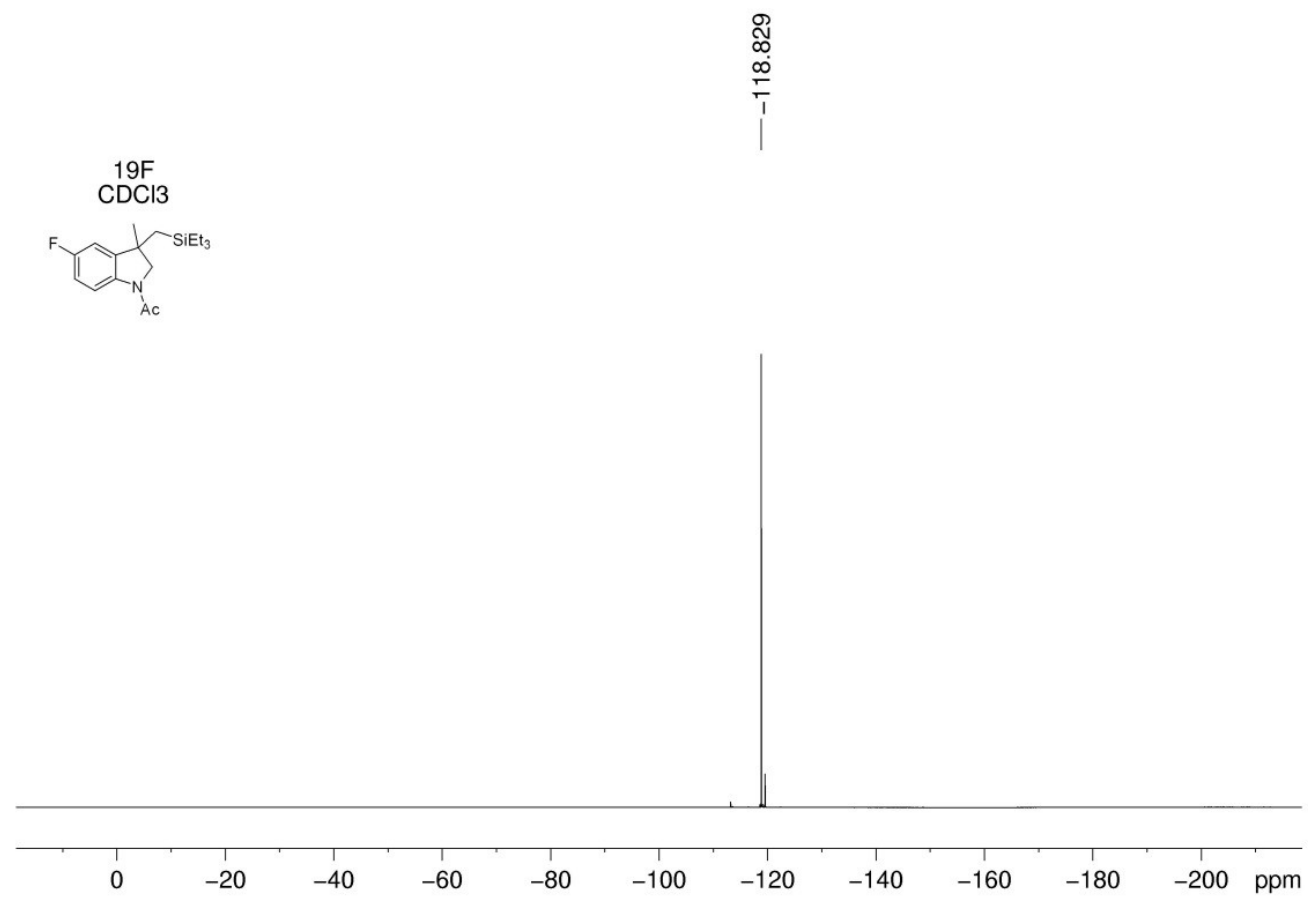

Figure S32. <sup>19</sup>F NMR (376 MHz, CDCl<sub>3</sub>) of compound 3ma



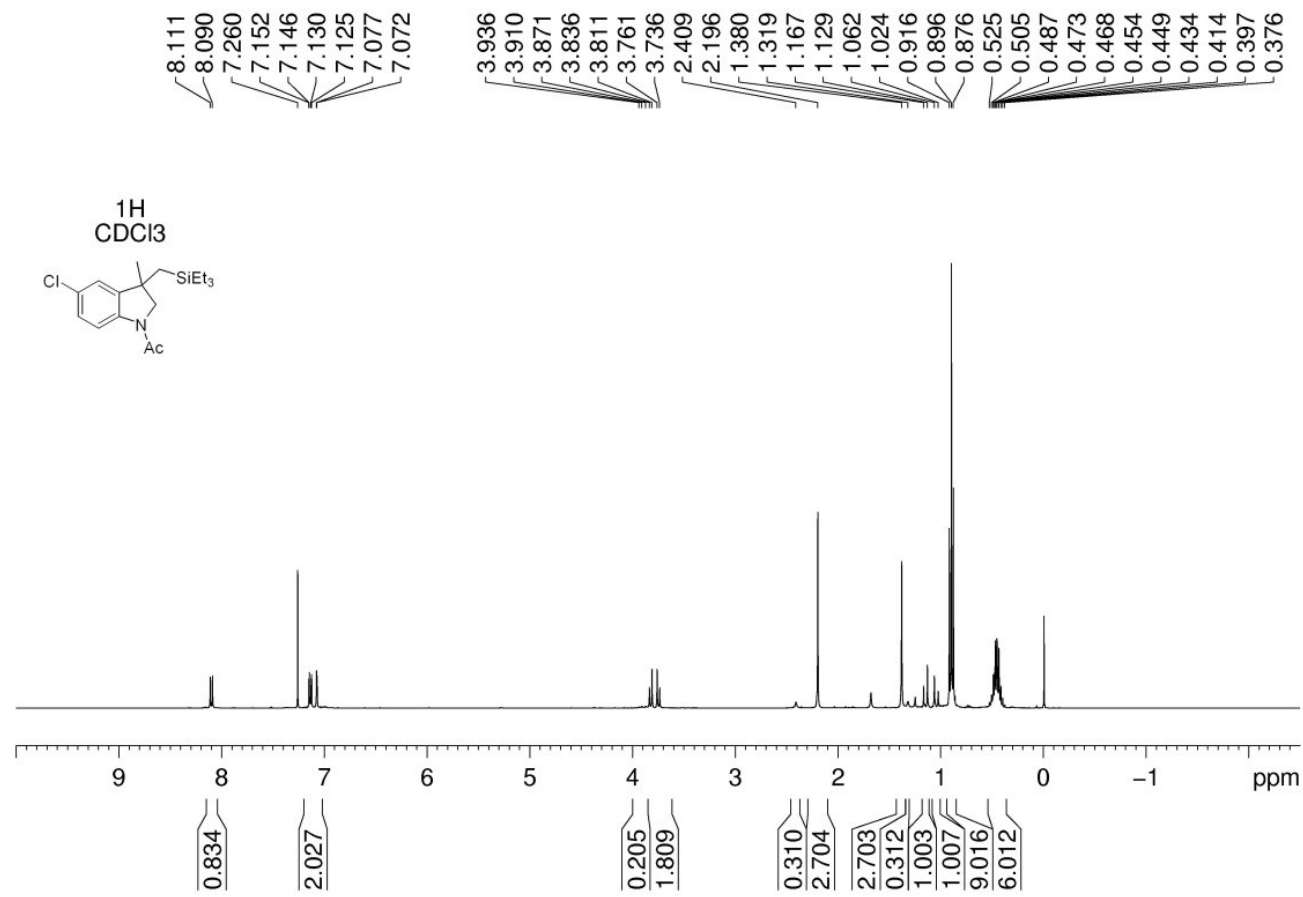

Figure S33. <sup>1</sup>H NMR (400 MHz, CDCl<sub>3</sub>) of compound 3na

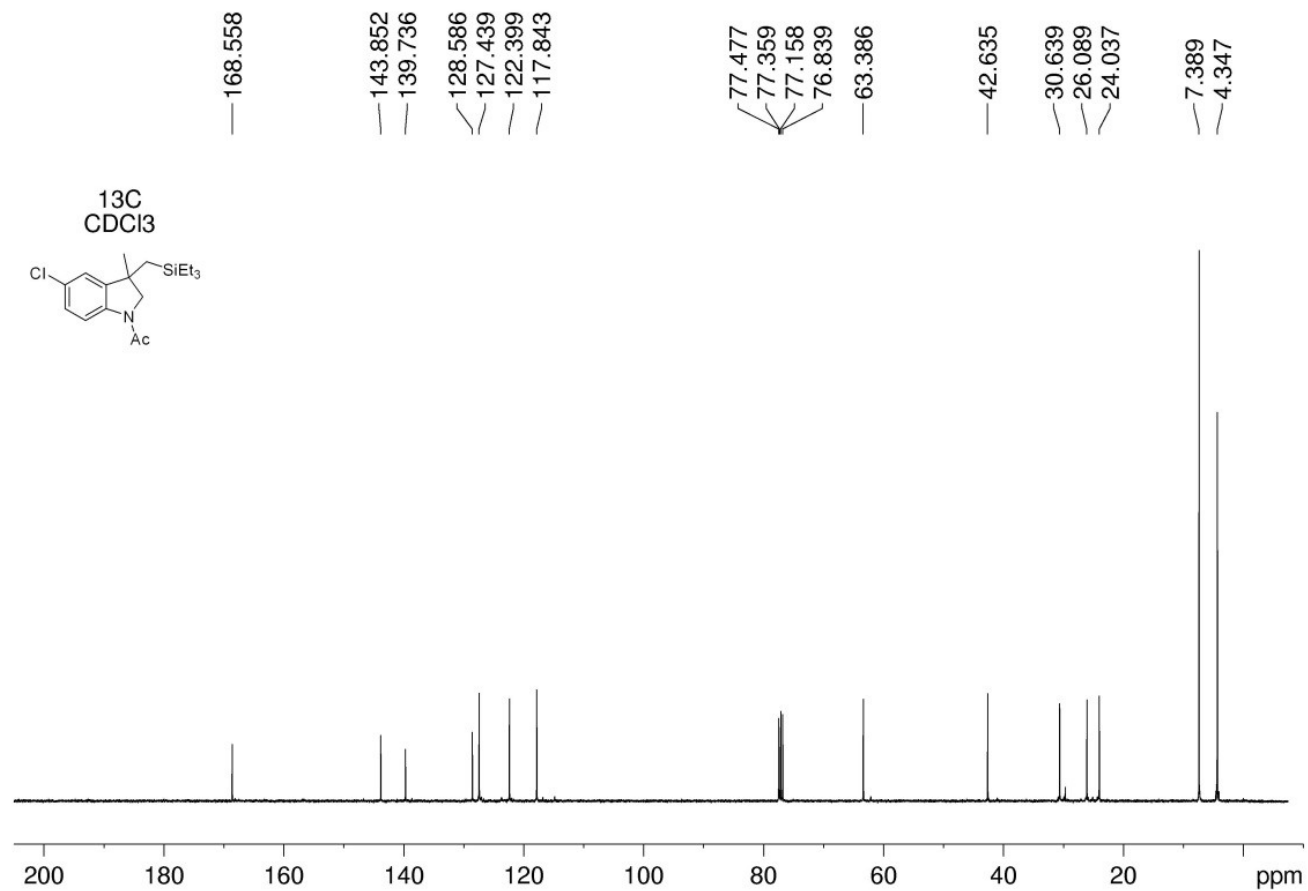

Figure S34. <sup>13</sup>C NMR (100 MHz, CDCl<sub>3</sub>) of compound 3na

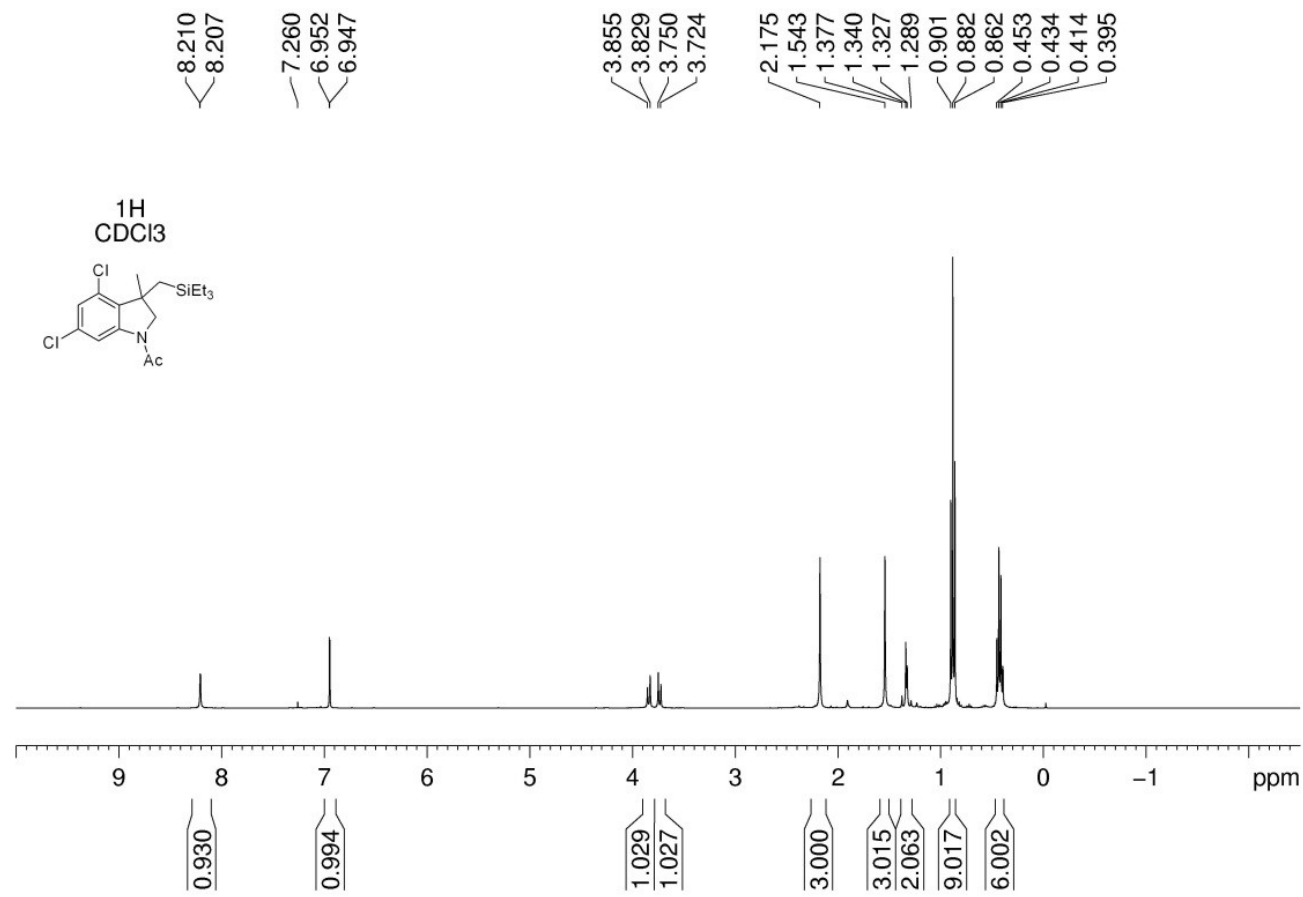

Figure S35. <sup>1</sup>H NMR (400 MHz, CDCl<sub>3</sub>) of compound 3pa

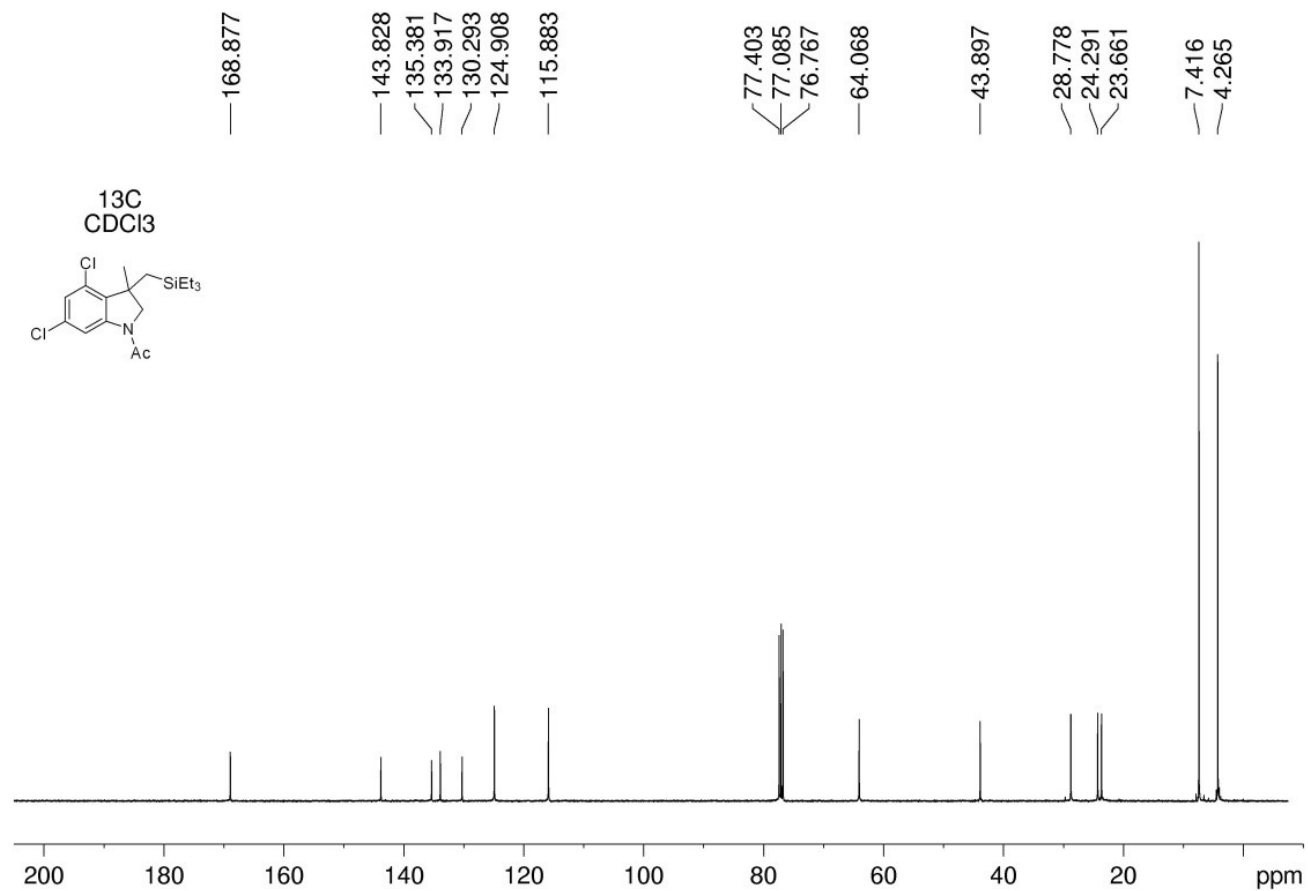

Figure S36. <sup>13</sup>C NMR (100 MHz, CDCl<sub>3</sub>) of compound 3ba

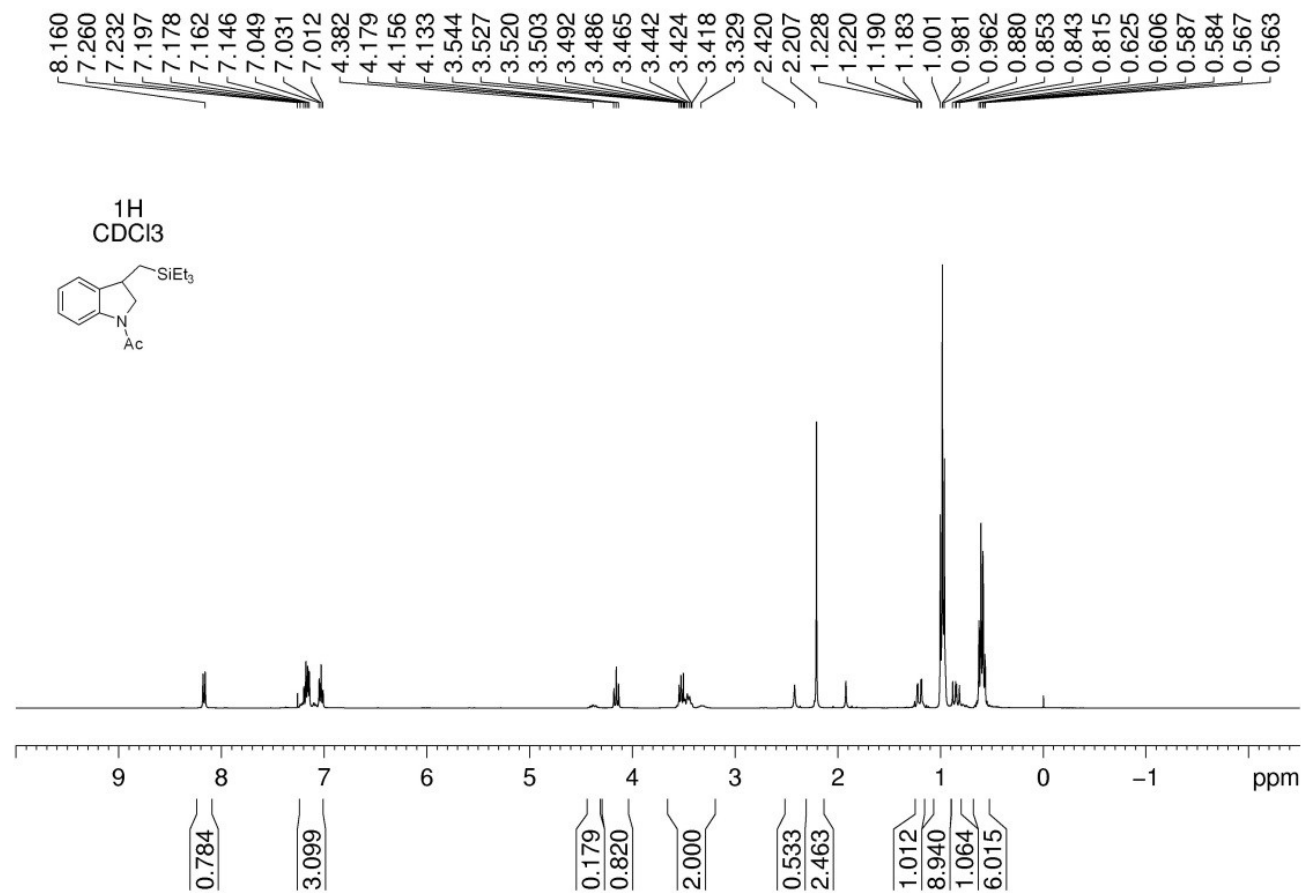

Figure S37. <sup>1</sup>H NMR (400 MHz, CDCl<sub>3</sub>) of compound 3qa

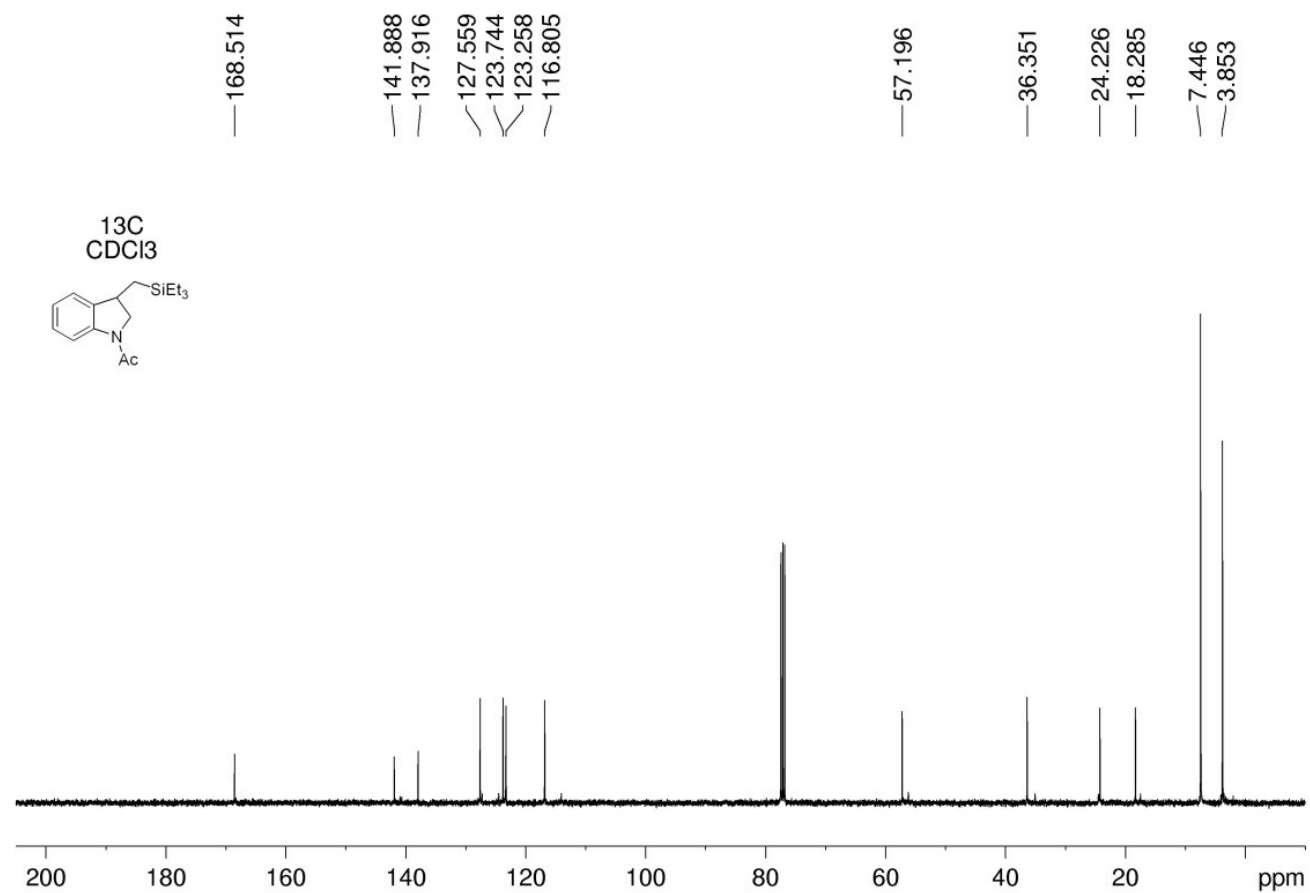

Figure S38. <sup>13</sup>C NMR (100 MHz, CDCl<sub>3</sub>) of compound 3qa

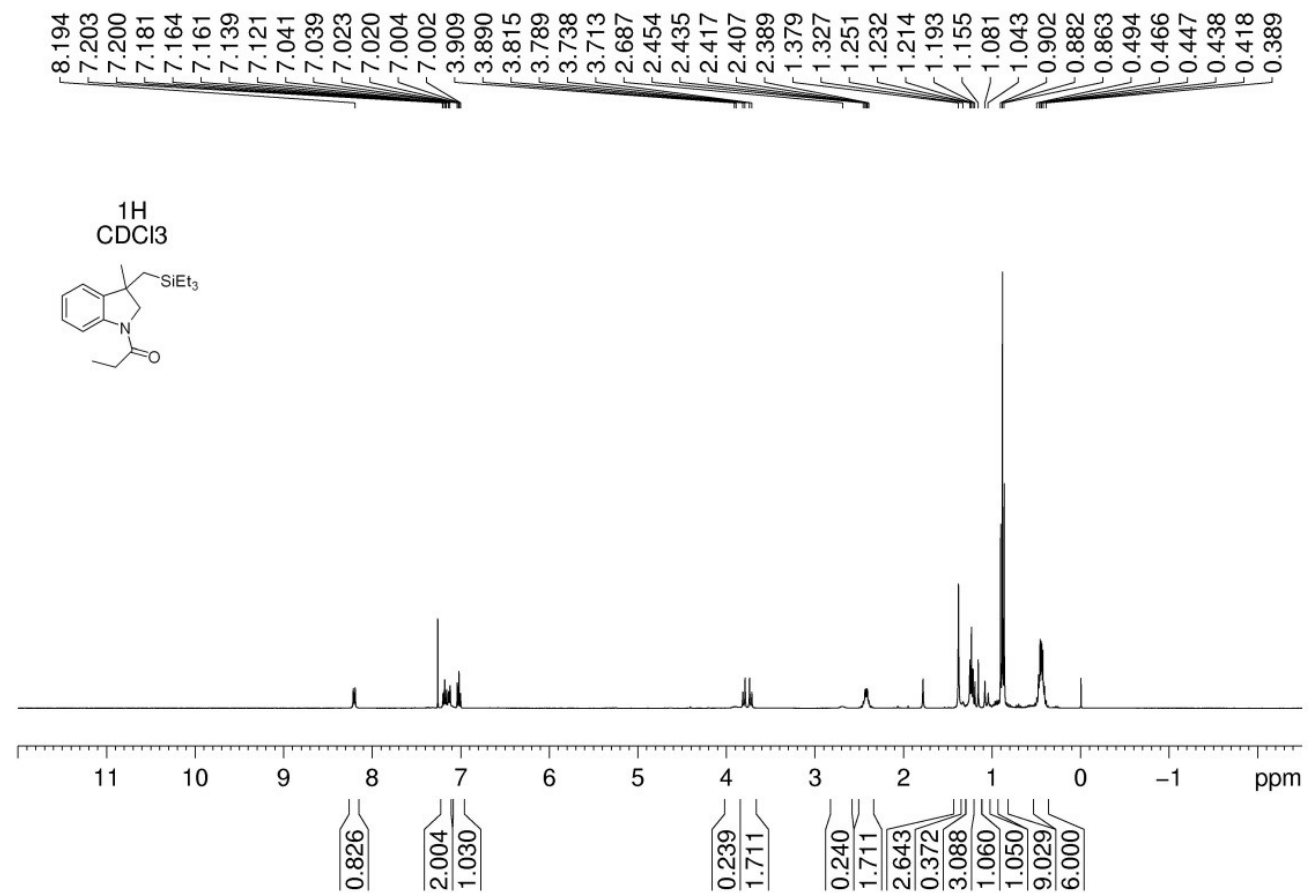

Figure S39. <sup>1</sup>H NMR (400 MHz, CDCl<sub>3</sub>) of compound 3ra

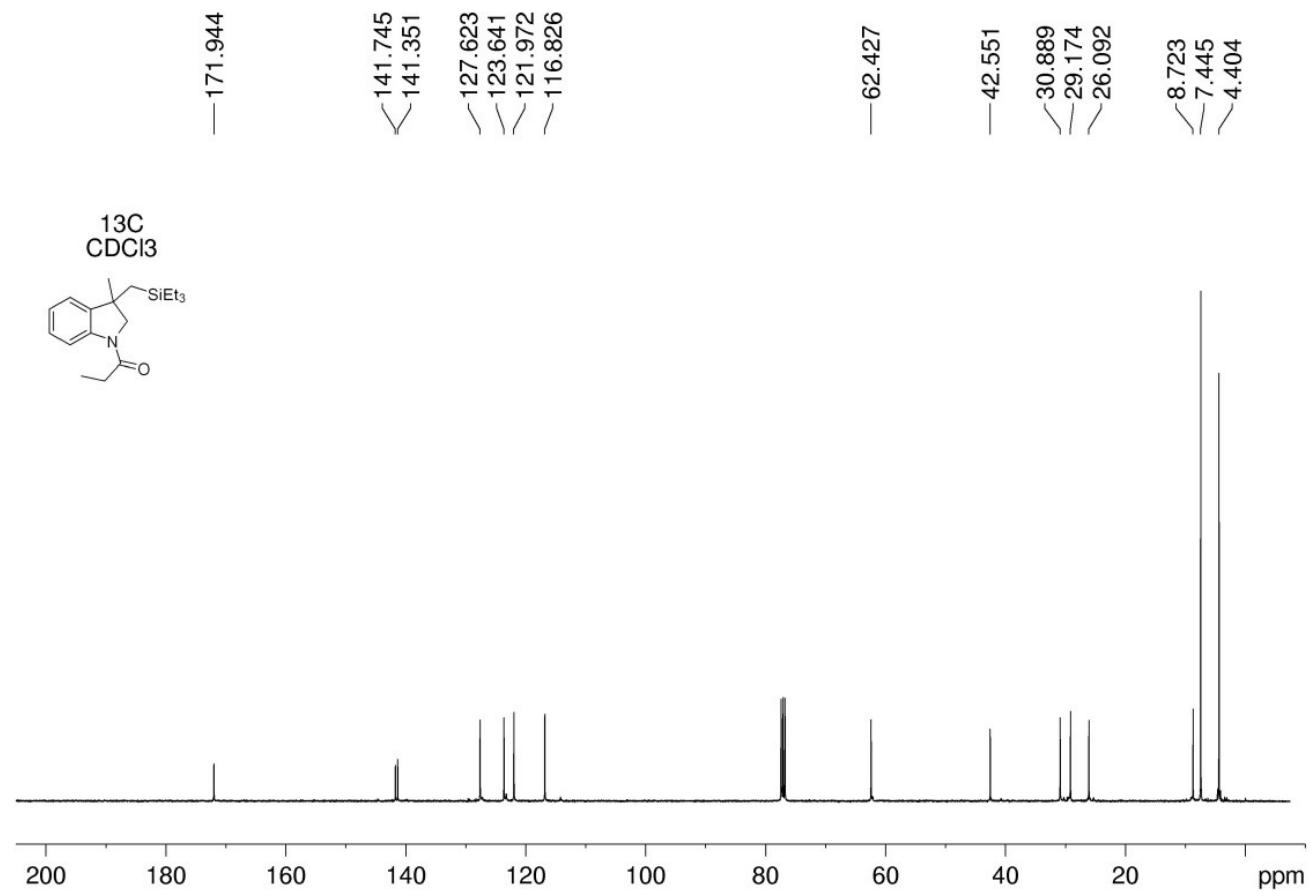

Figure S40. <sup>13</sup>C NMR (100 MHz, CDCl<sub>3</sub>) of compound 3ra



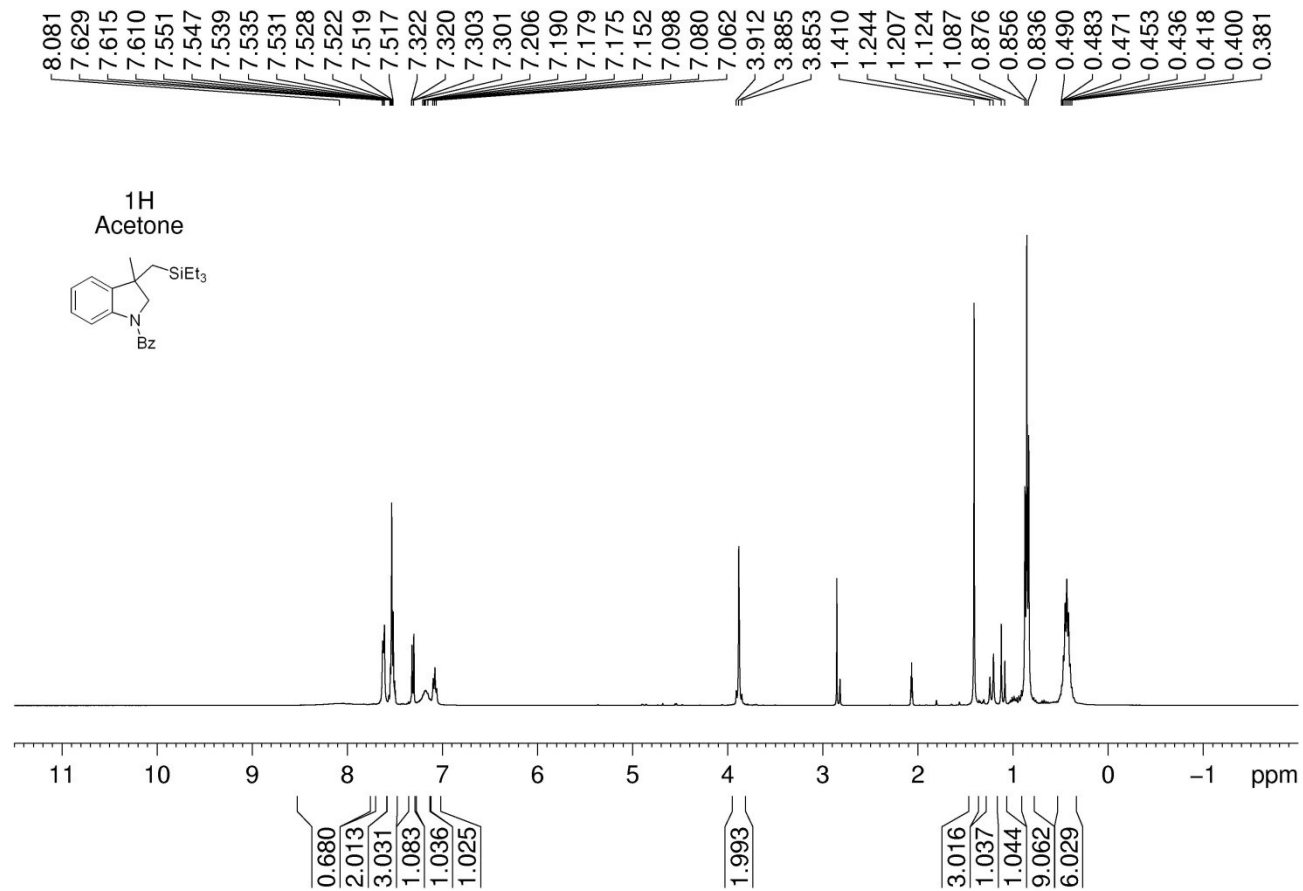

Figure S41. <sup>1</sup>H NMR (400 MHz, CDCl<sub>3</sub>) of compound 3sa

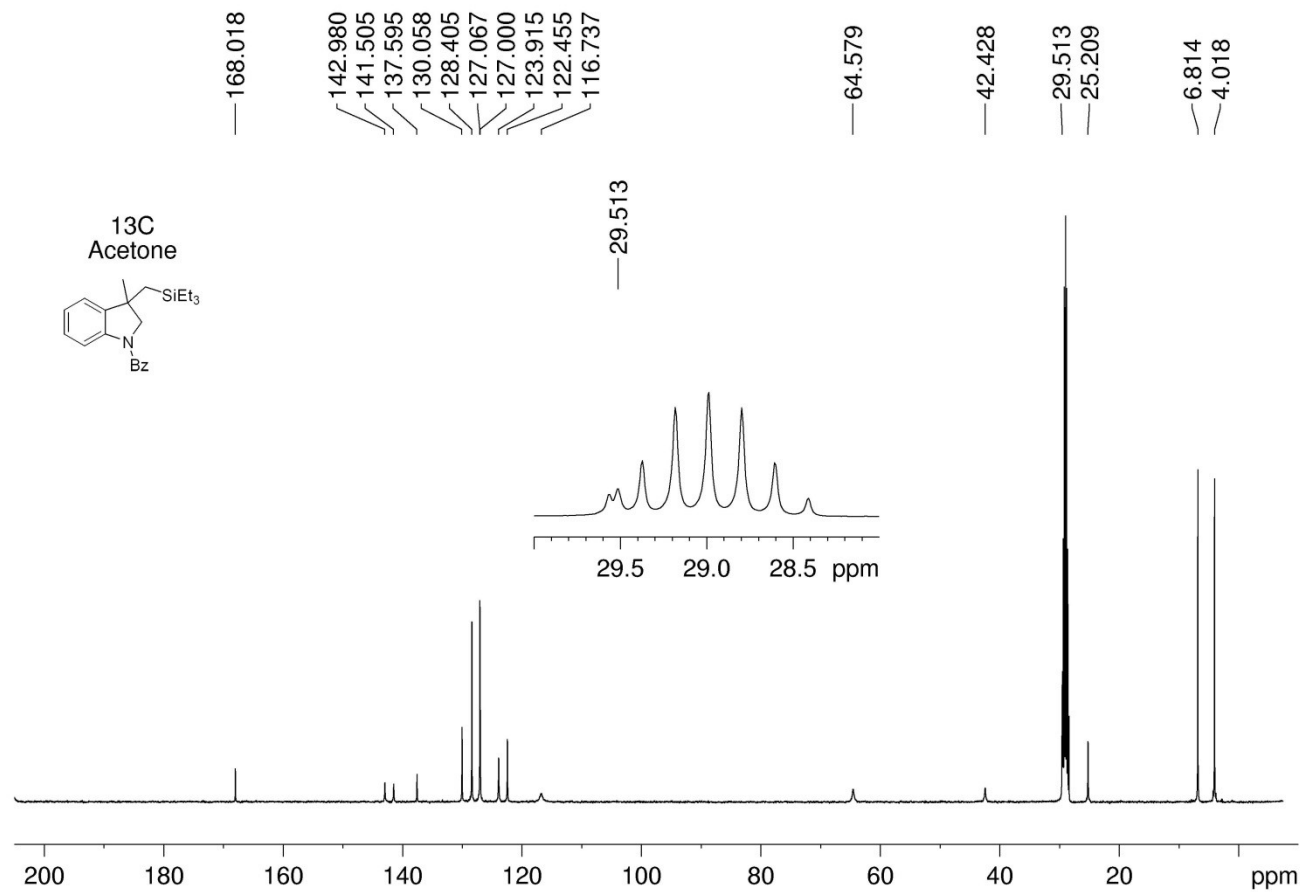

Figure S42. <sup>13</sup>C NMR (100 MHz, CDCl<sub>3</sub>) of compound 3sa

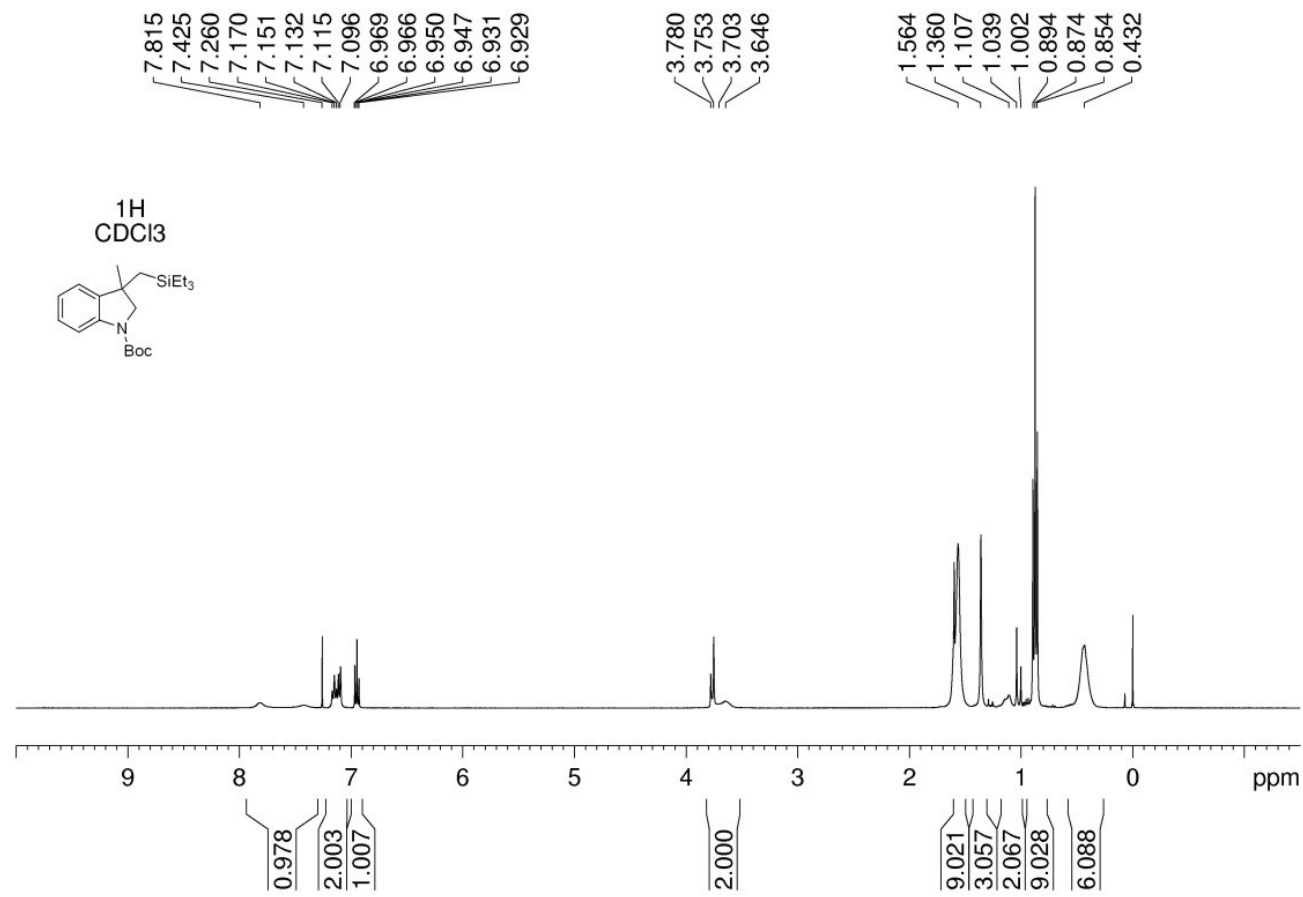

Figure S43. <sup>1</sup>H NMR (400 MHz, CDCl<sub>3</sub>) of compound 3ta

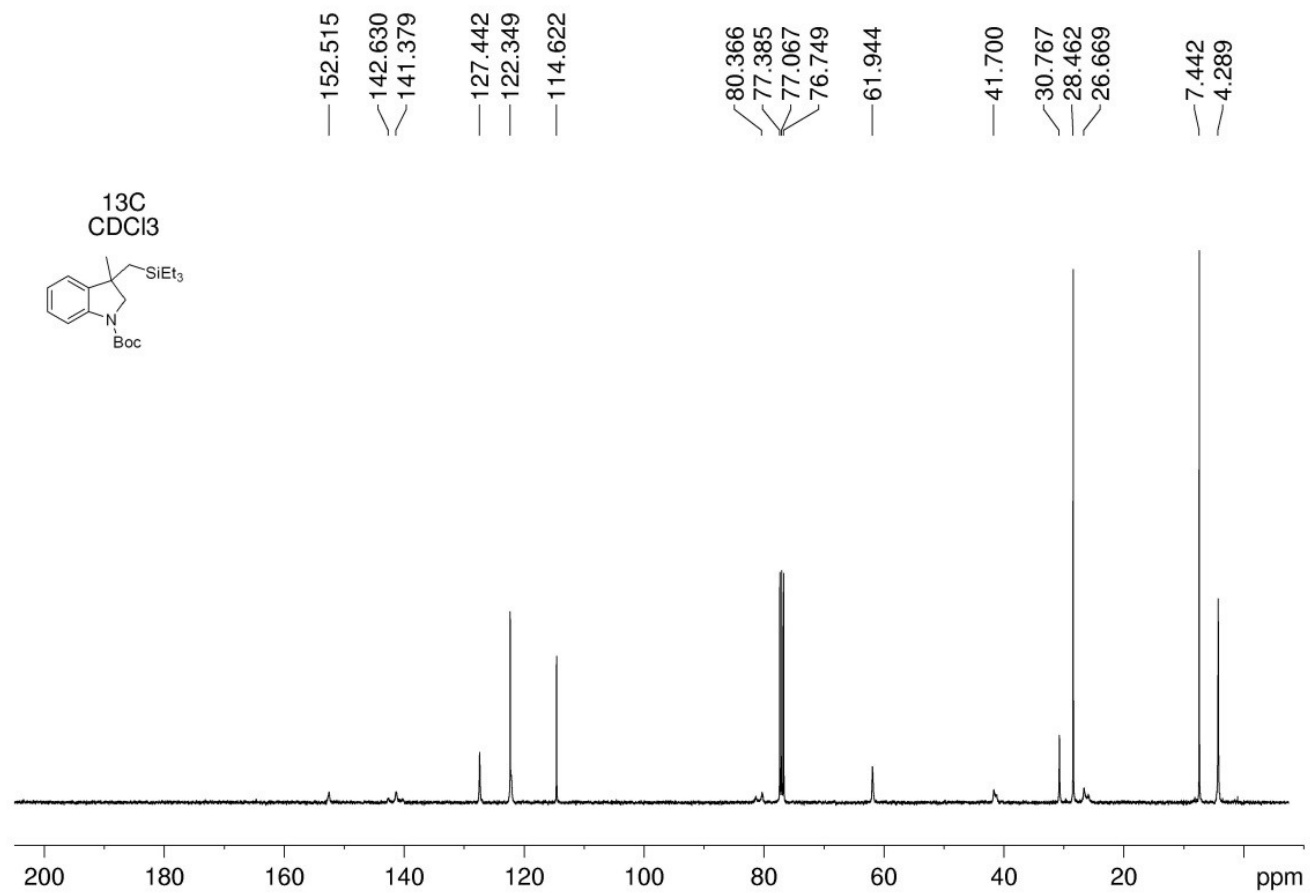

Figure S44. <sup>13</sup>C NMR (100 MHz, CDCl<sub>3</sub>) of compound 3ta

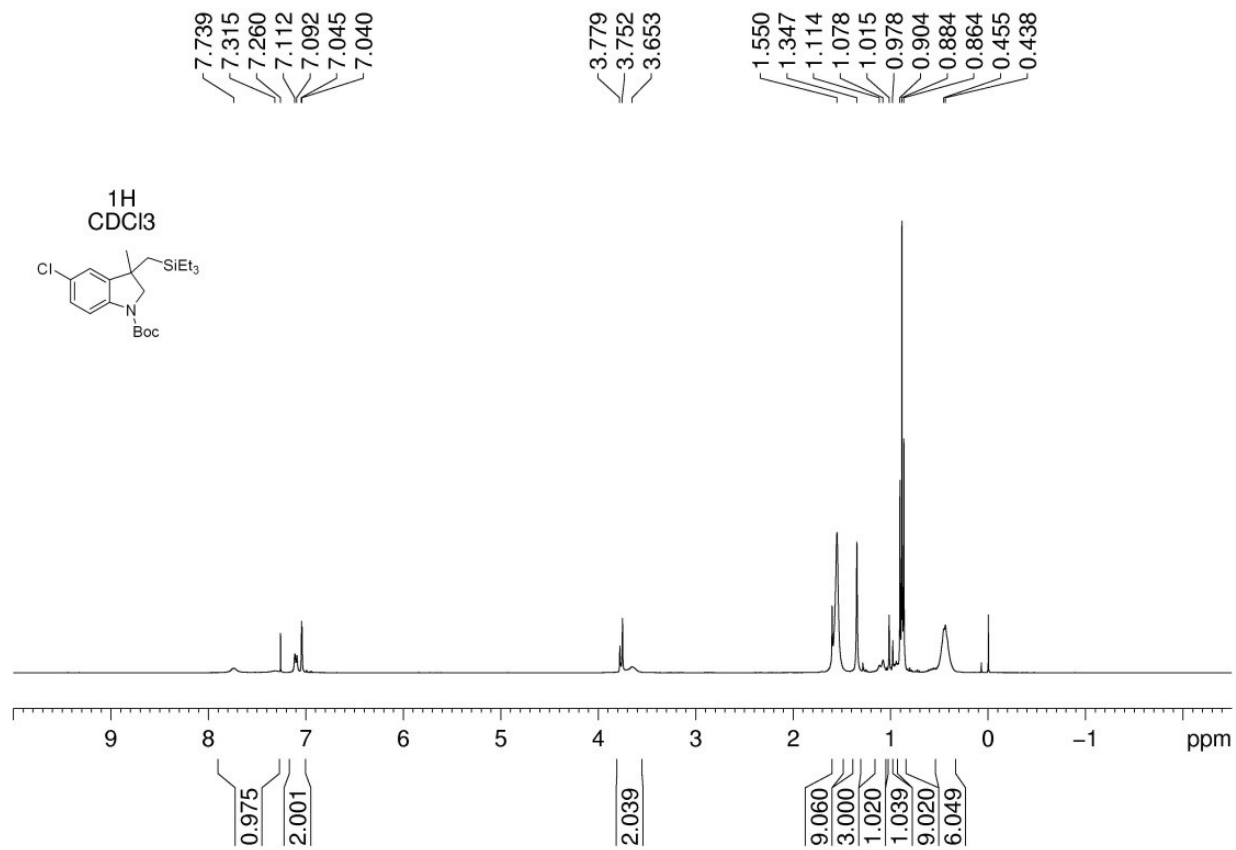

Figure S45. <sup>1</sup>H NMR (400 MHz, CDCl<sub>3</sub>) of compound 3ua

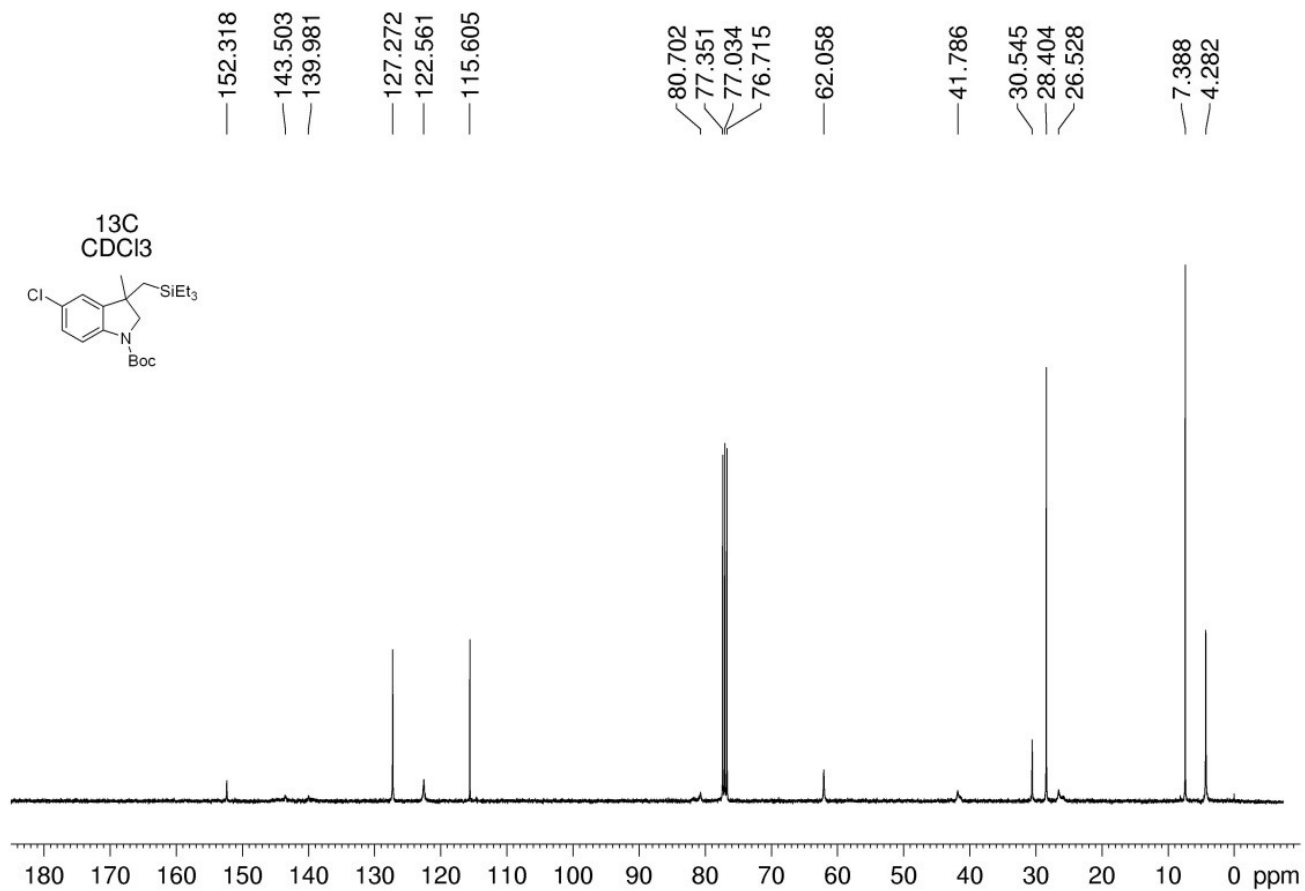

Figure S46. <sup>13</sup>C NMR (100 MHz, CDCl<sub>3</sub>) of compound 3ua

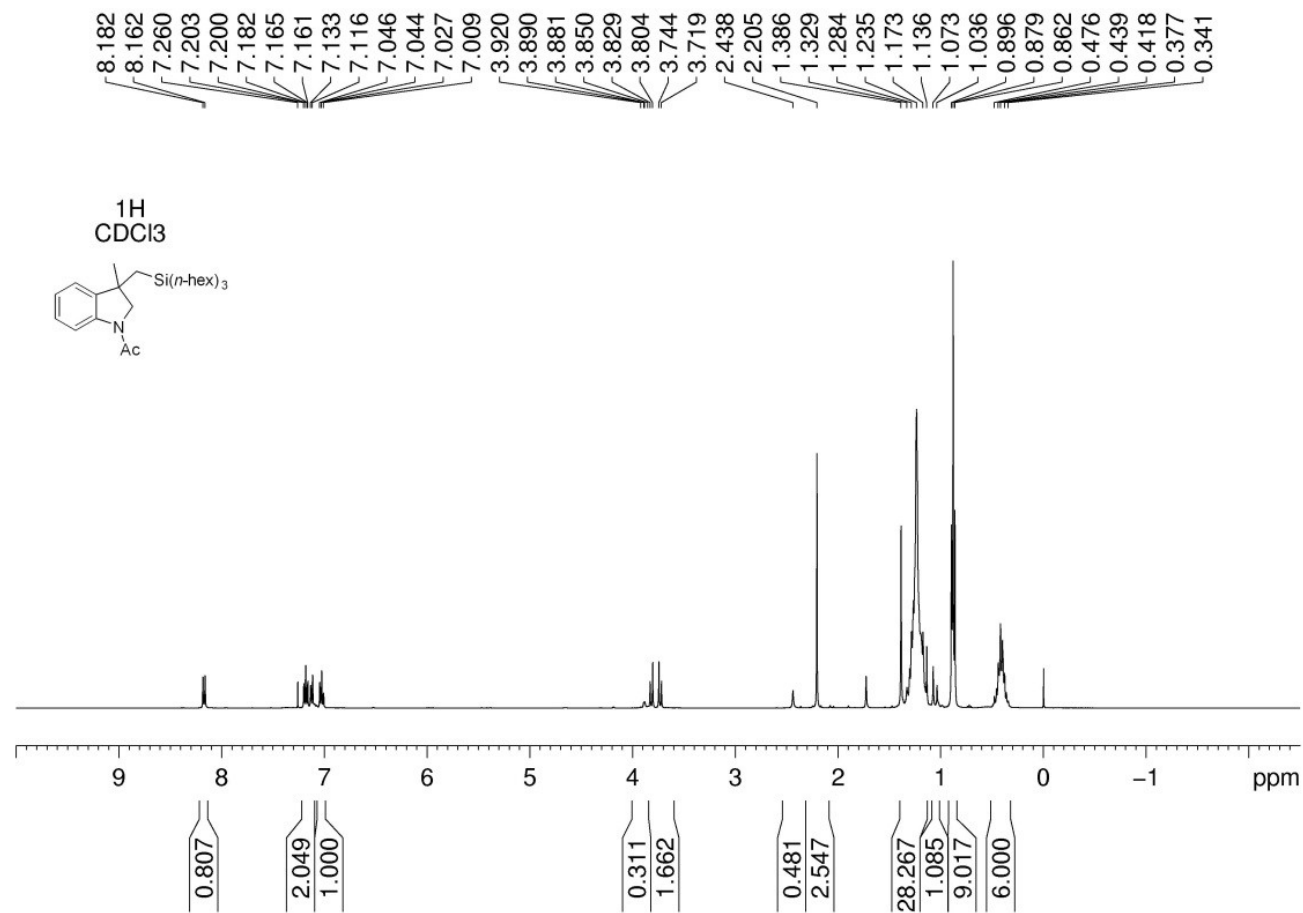

Figure S47. <sup>1</sup>H NMR (400 MHz, CDCl<sub>3</sub>) of compound 3ab

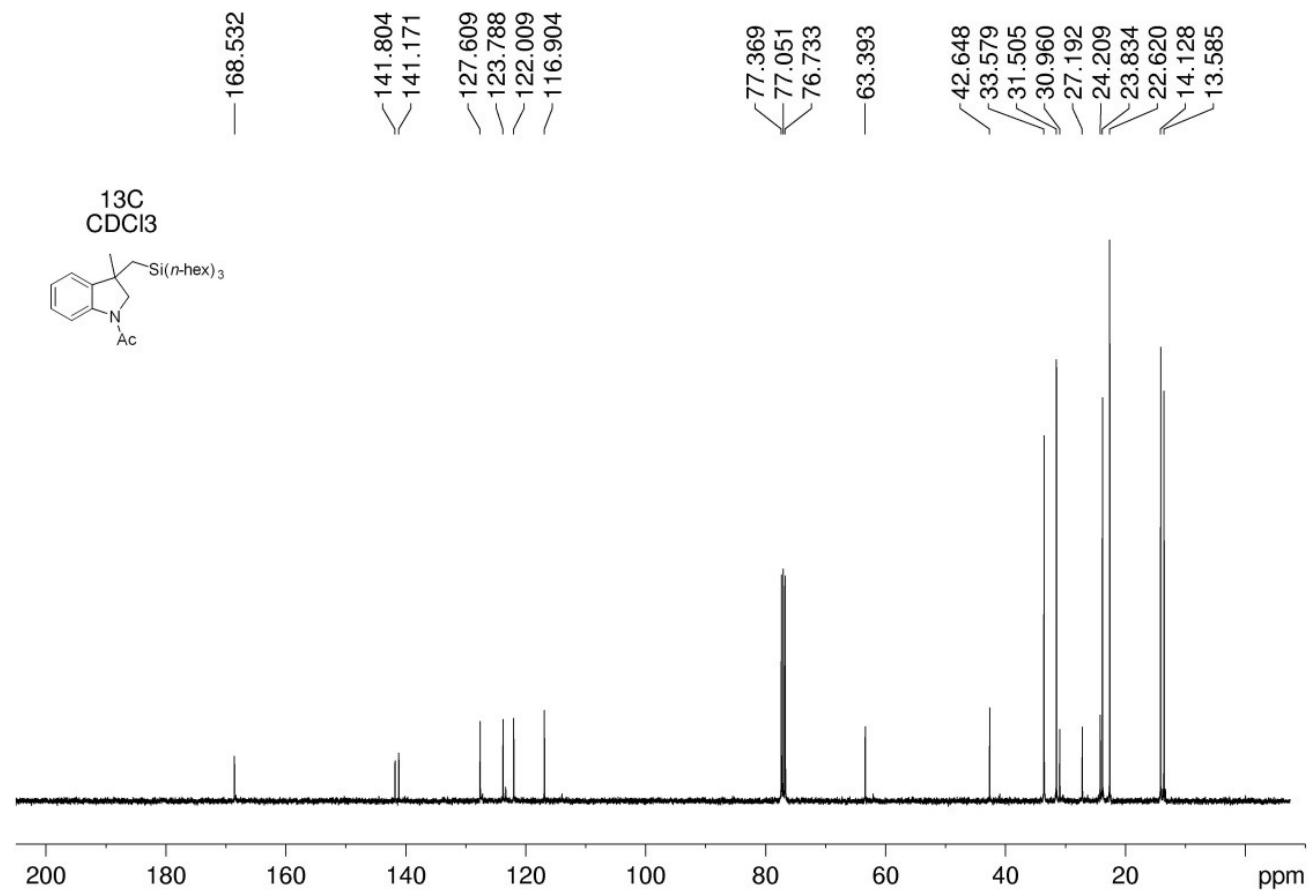

Figure S48. <sup>13</sup>C NMR (100 MHz, CDCl<sub>3</sub>) of compound 3ab



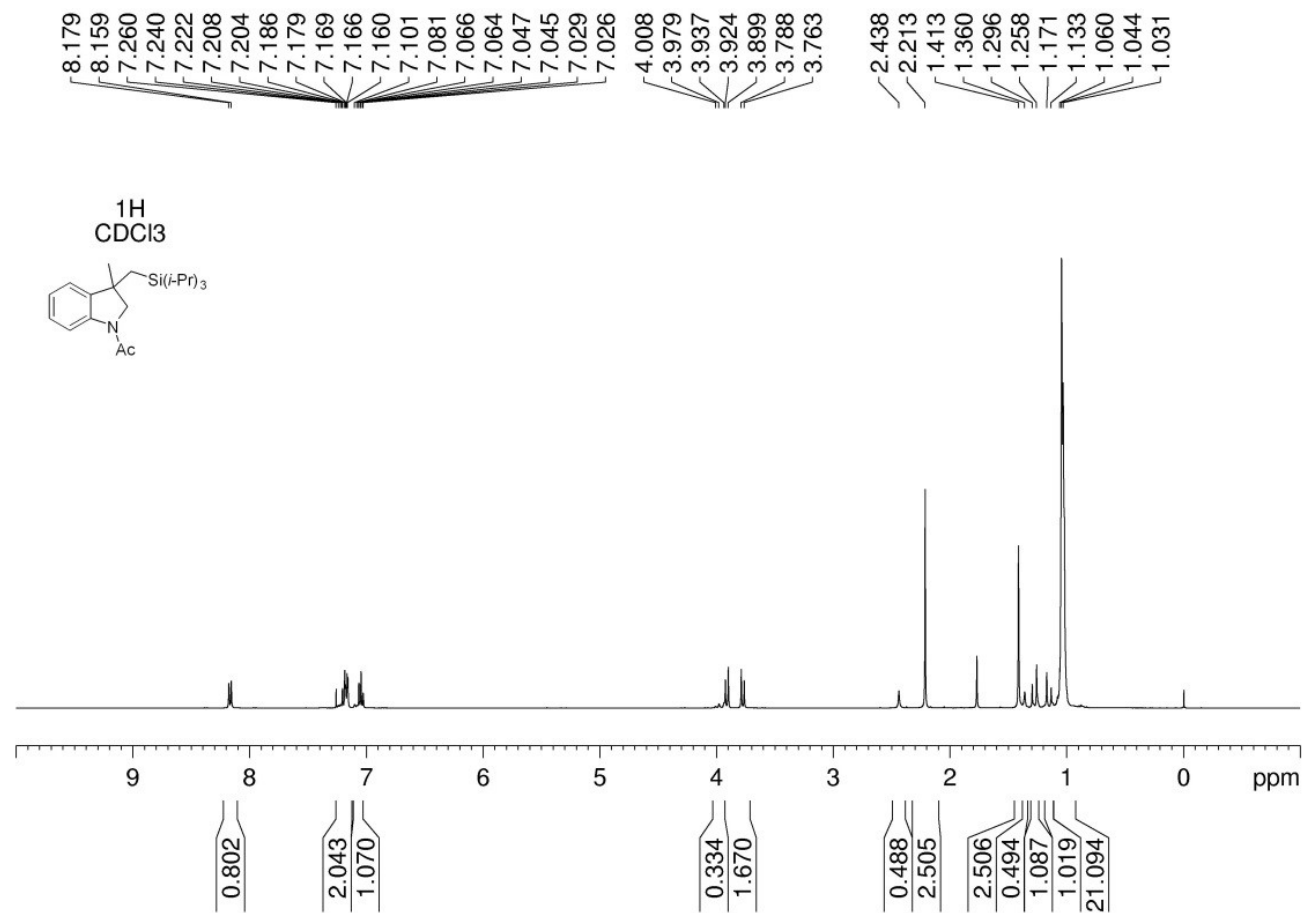

Figure S49. <sup>1</sup>H NMR (400 MHz, CDCl<sub>3</sub>) of compound 3ac

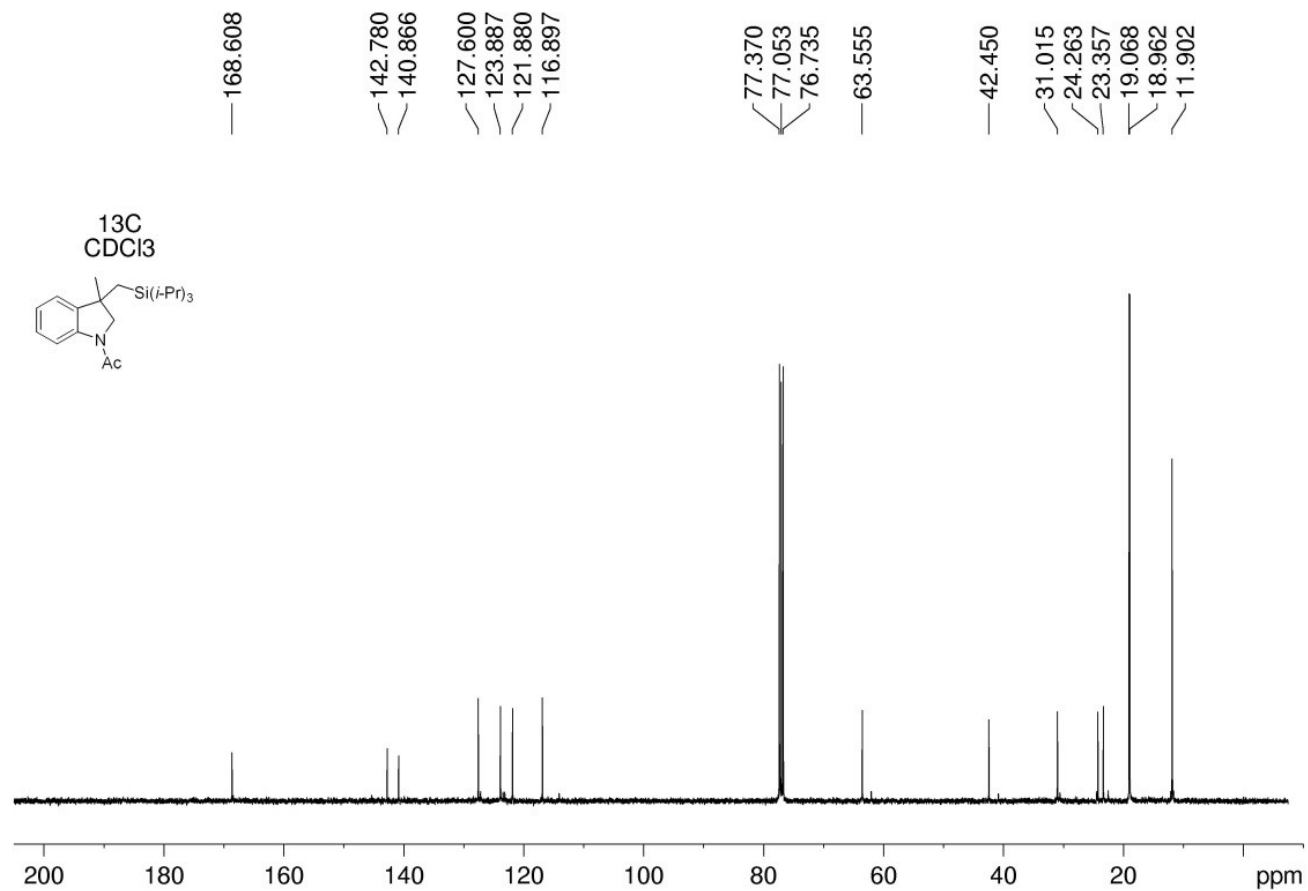

Figure S50. <sup>13</sup>C NMR (100 MHz, CDCl<sub>3</sub>) of compound 3ac

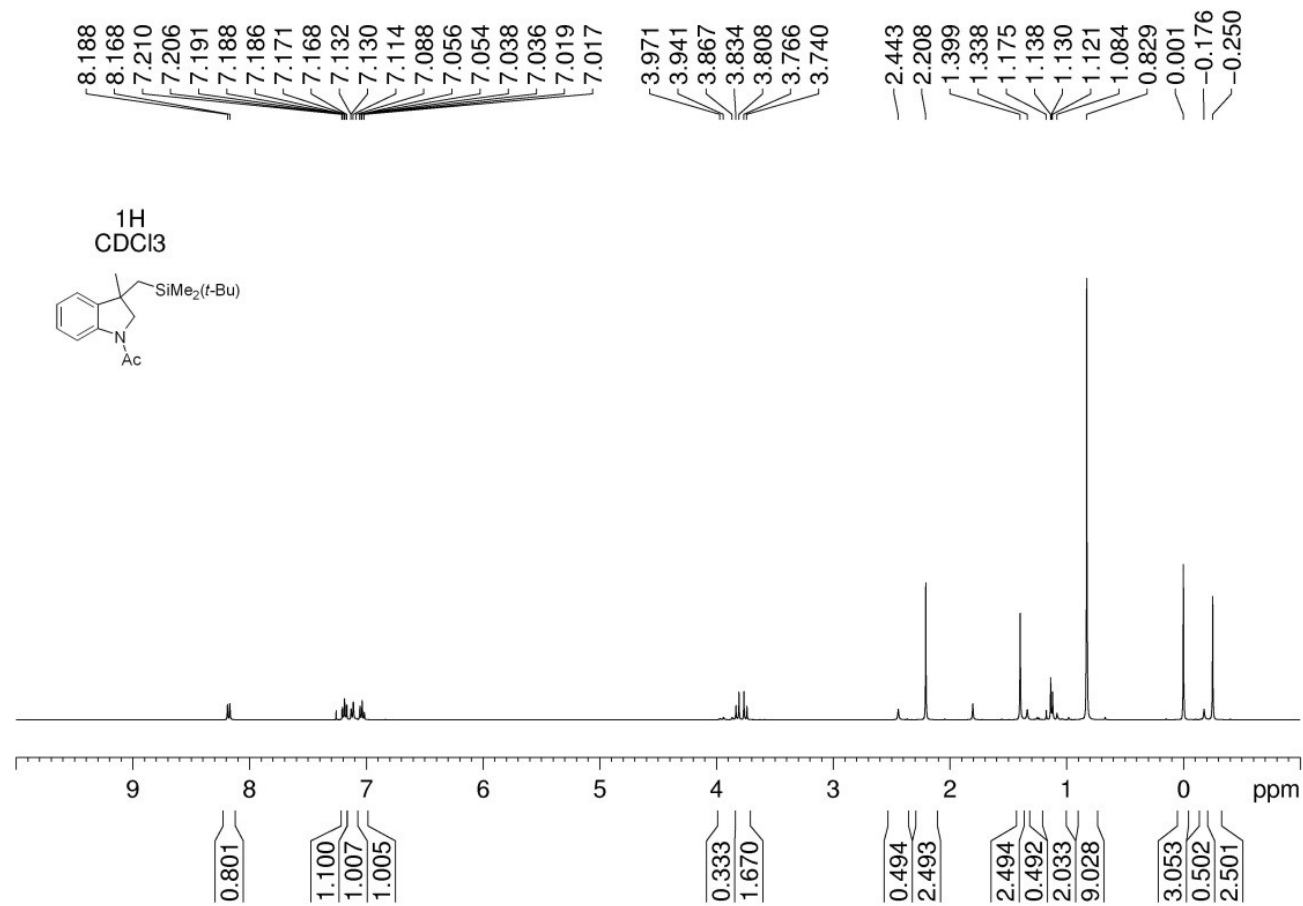

Figure S51. <sup>1</sup>H NMR (400 MHz, CDCl<sub>3</sub>) of compound 3ad

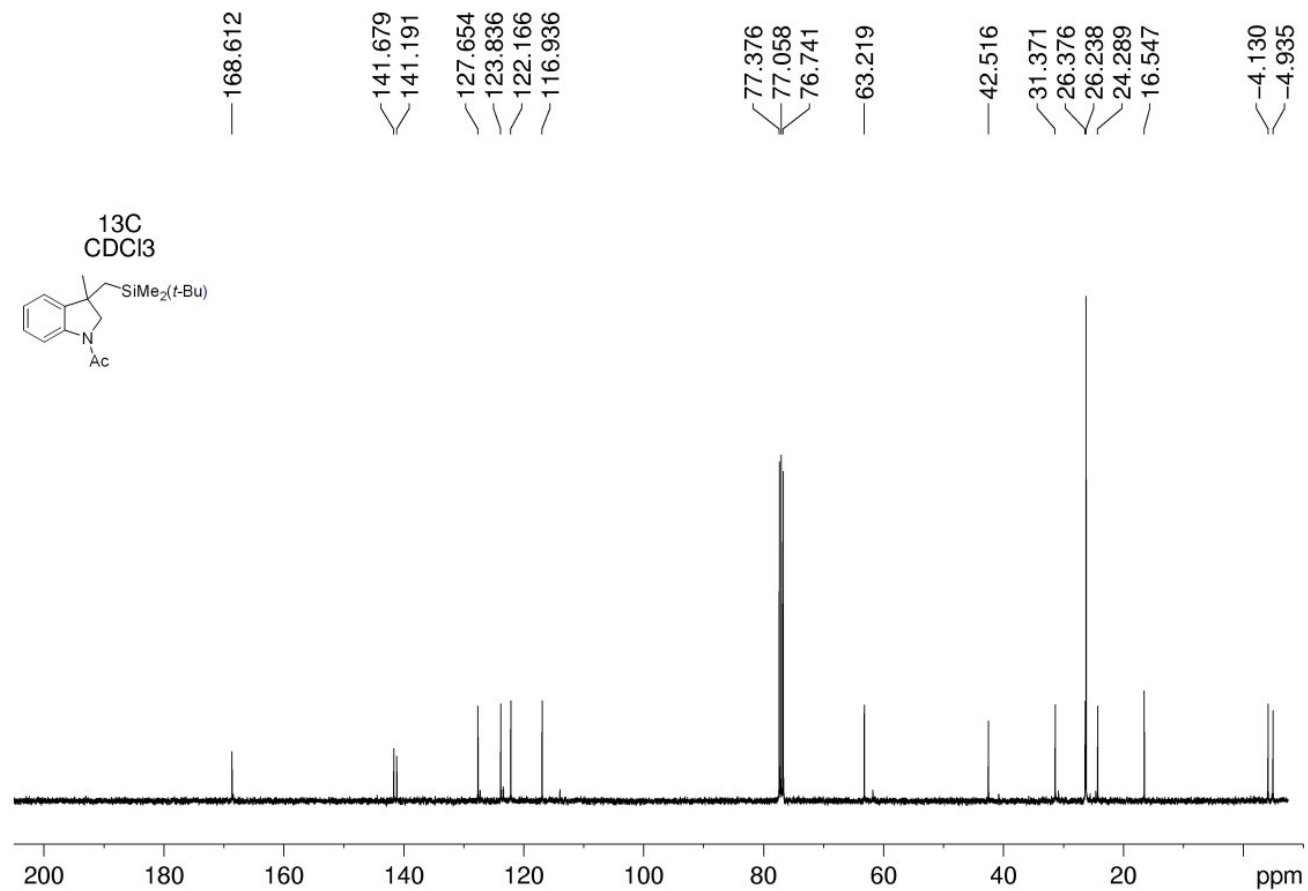

Figure S52. <sup>13</sup>C NMR (100 MHz, CDCl<sub>3</sub>) of compound 3ad

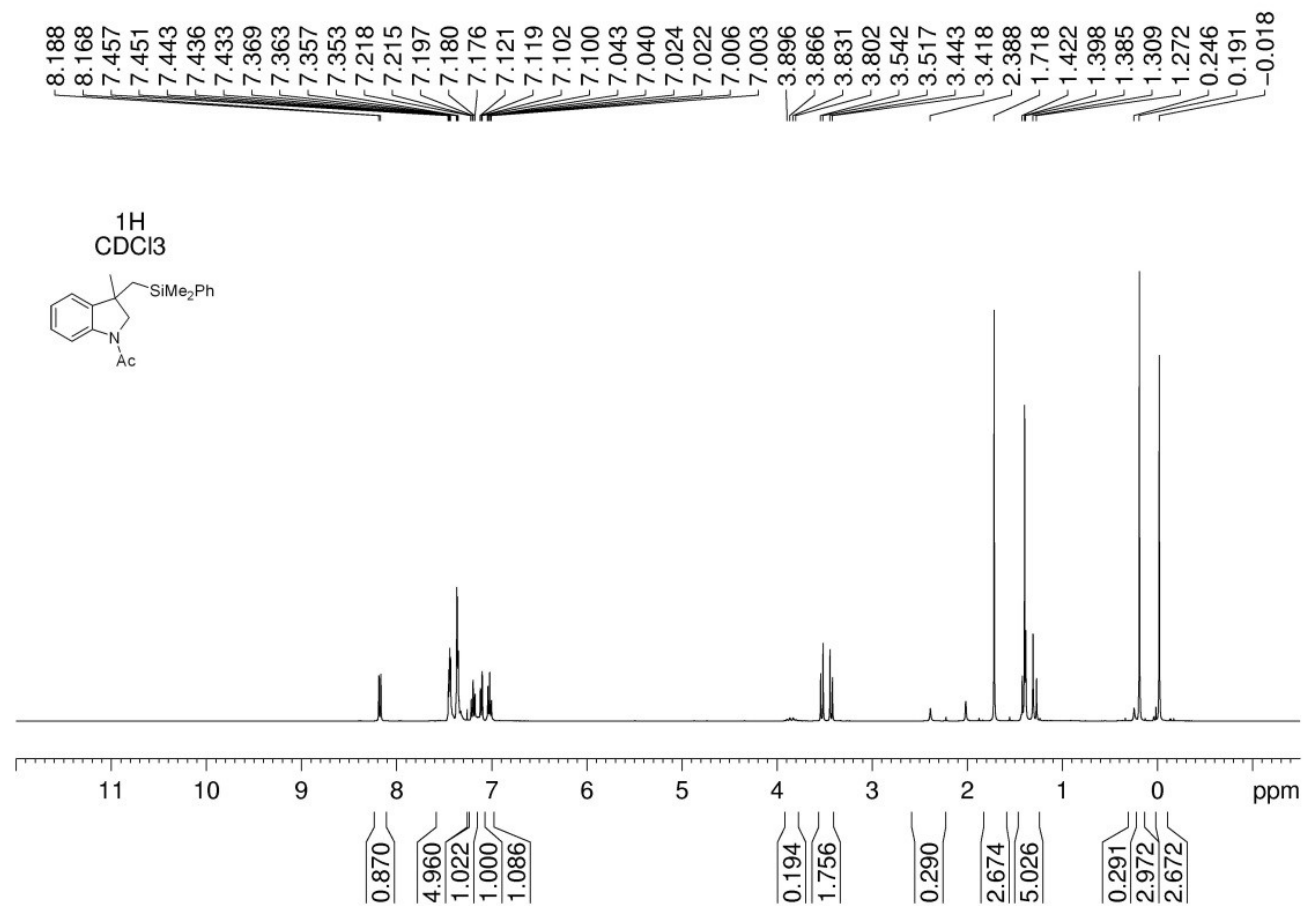

Figure S53. <sup>1</sup>H NMR (400 MHz, CDCl<sub>3</sub>) of compound 3ae

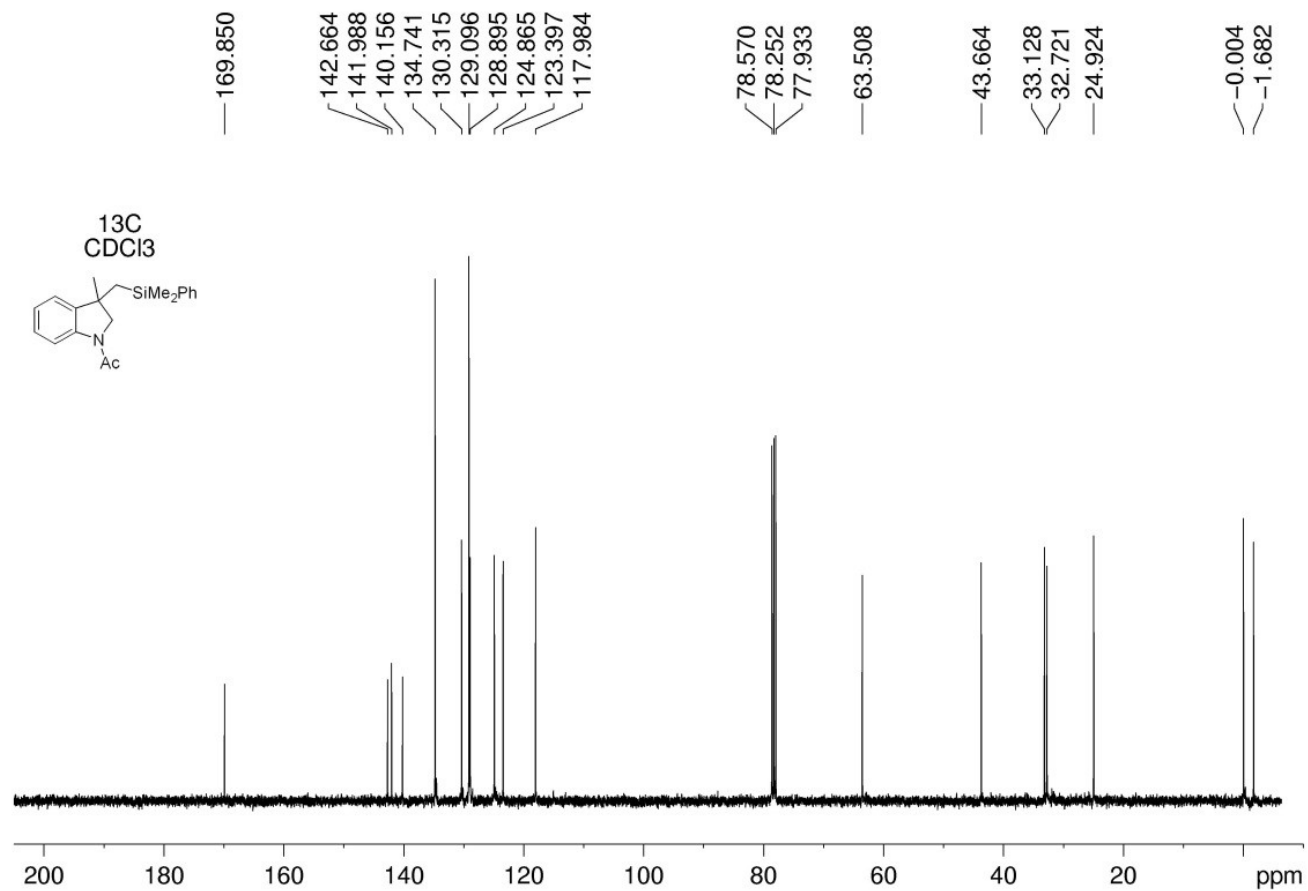

Figure S54. <sup>13</sup>C NMR (100 MHz, CDCl<sub>3</sub>) of compound 3ae

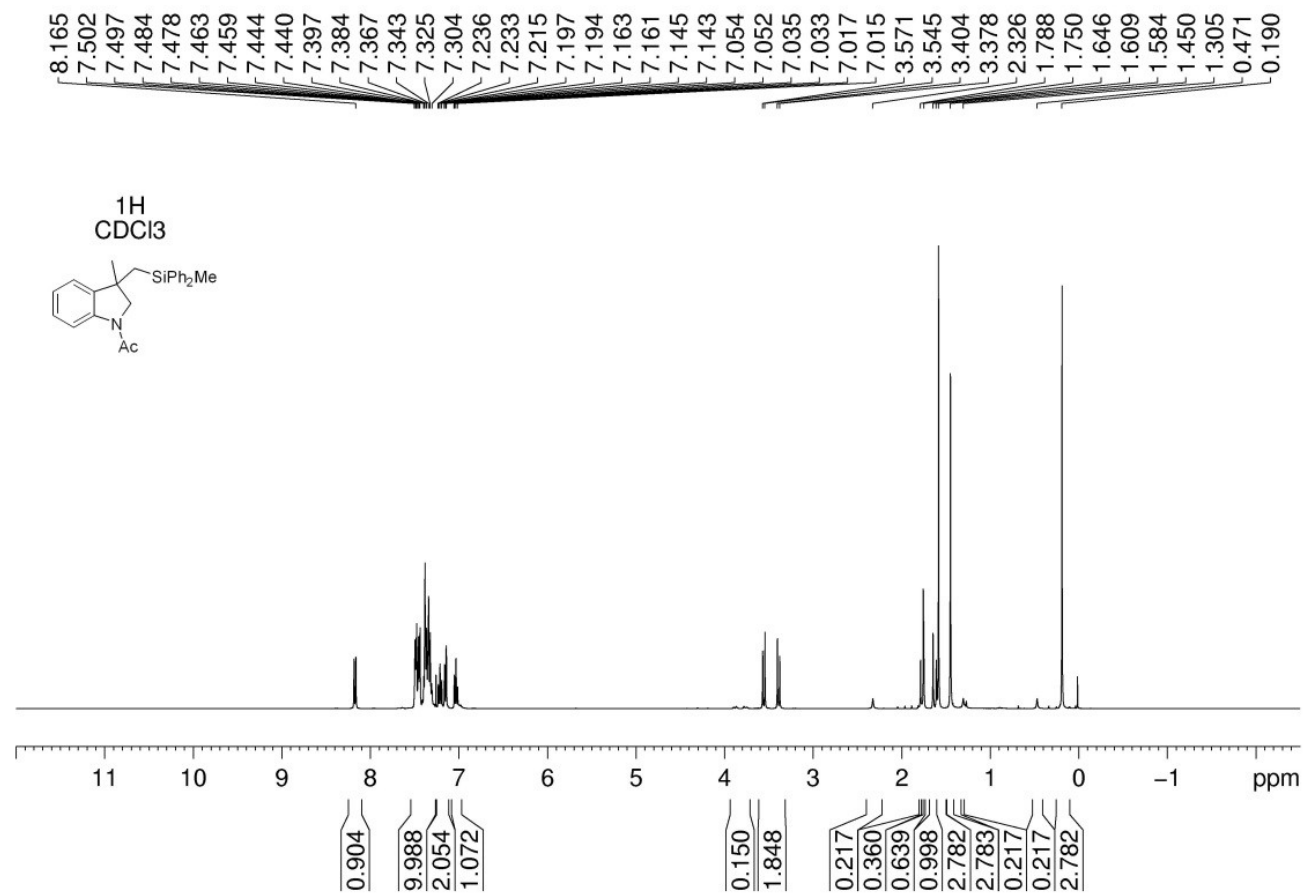

Figure S55. <sup>1</sup>H NMR (400 MHz, CDCl<sub>3</sub>) of compound 3af

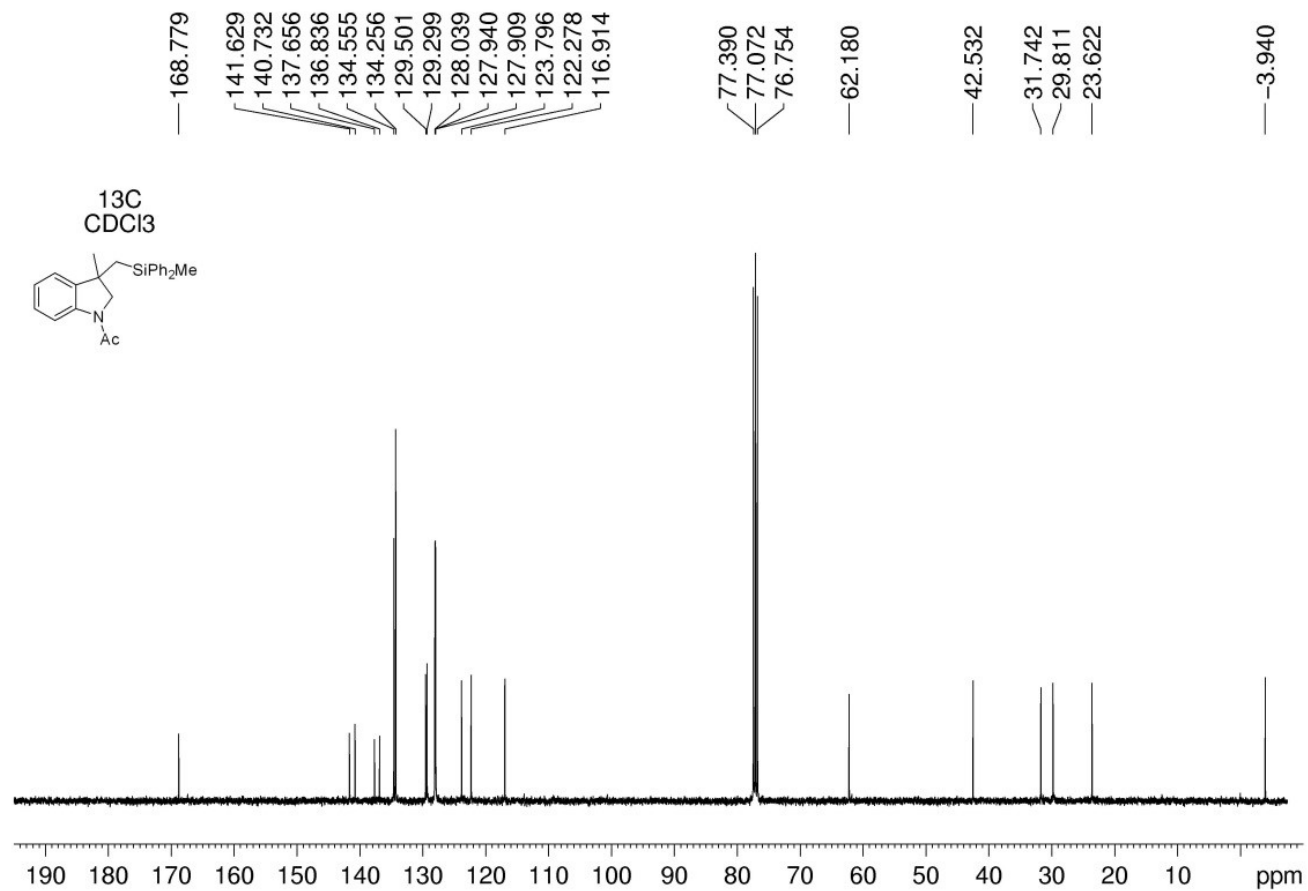

Figure S56. <sup>13</sup>C NMR (100 MHz, CDCl<sub>3</sub>) of compound 3f



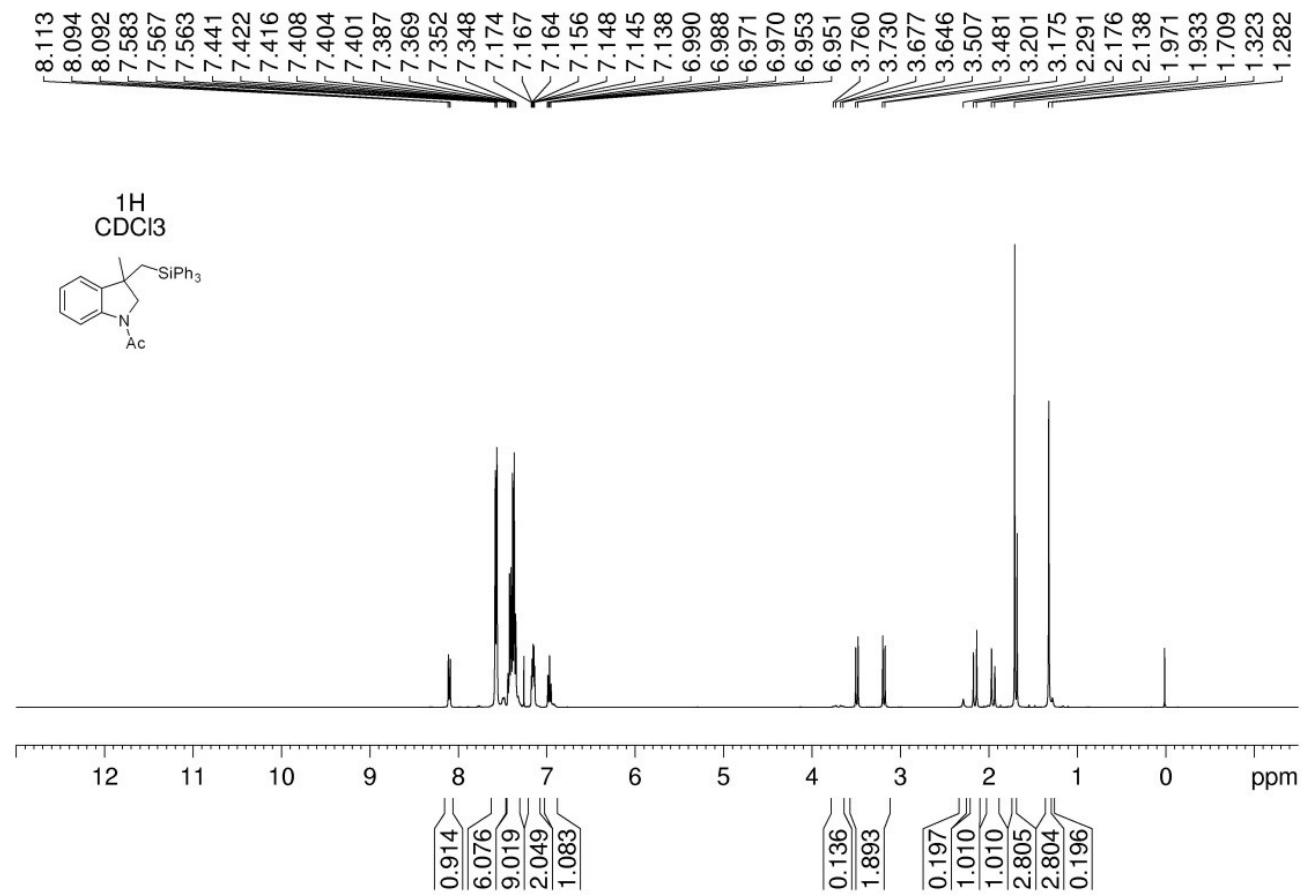

Figure S57. <sup>1</sup>H NMR (400 MHz, CDCl<sub>3</sub>) of compound 3ag

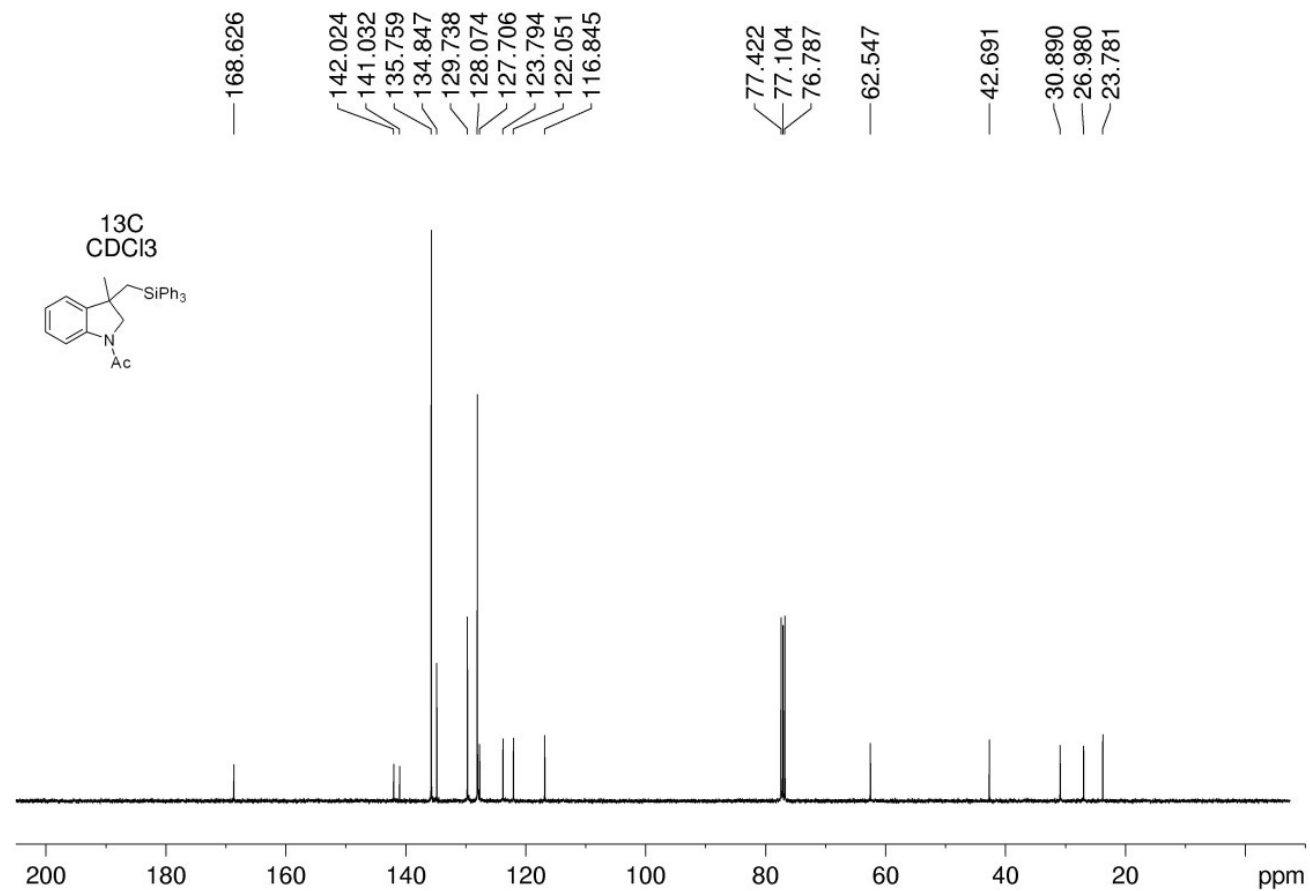

Figure S58. <sup>13</sup>C NMR (100 MHz, CDCl<sub>3</sub>) of compound 3ag
